# Supplementary material for: Chiral phosphoramide-catalyzed enantioselective synthesis of 2,3′-diindolylarylmethanes from indol-2-yl carbinols and indoles
Source: Royal Society of Chemistry journal article supplement (doi:10.1039/c4cc03605k), 2014-06-11
Supplement: c4cc03605k1.pdf [file c4cc03605k1.pdf]

*Supporting information*

*for*

**Chiral Phosphoramidate-Catalyzed Enantioselective Synthesis of  
2,3'-Diindolylarylmethanes from Indol-2-yl Carbinol and Indole**

Shuai Qi,<sup>a,b</sup> Chao-You Liu,<sup>a,b</sup> Jin-Ying Ding<sup>a</sup> and Fu-She Han<sup>a,c,\*</sup>

<sup>a</sup> *Changchun Institute of Applied Chemistry, Chinese Academy of Sciences,  
Changchun, Jilin 130022, China*

<sup>b</sup> *The University of Chinese Academy of Sciences, Beijing 100864, China*

<sup>c</sup> *Key Lab of Synthetic Chemistry of Natural Substances, Shanghai Institute of  
Organic Chemistry, CAS, China*

**CONTENTS:**

|                                                                                       |            |
|---------------------------------------------------------------------------------------|------------|
| <b>1 General Information.....</b>                                                     | <b>S2</b>  |
| <b>2 Experimental Section.....</b>                                                    | <b>S2</b>  |
| <b>2.1 Preparation and characterization of indol-2-yl carbinos.....</b>               | <b>S2</b>  |
| <b>2.2 General procedure and product characterization of asymmetric reaction...S8</b> |            |
| <b>3 Copies of <sup>1</sup>H- and <sup>13</sup>C-NMR spectra of products.....</b>     | <b>S22</b> |
| <b>4 Copies of HPLC spectra and the integration area.....</b>                         | <b>S50</b> |

## 1. General Information

Anhydrous solvents were prepared by distillation according to standard methods. All starting materials were purchased from Alfa or Aldrich and used without further purification. All catalysts were synthesized according to the literatures.<sup>1-12</sup> Unless otherwise noted, the <sup>1</sup>H NMR spectra were recorded at 400 MHz or 300 MHz (Bruker AV) and the <sup>13</sup>C NMR spectra were recorded at 100 MHz with TMS as internal standard. All shifts are given in ppm. All coupling constants (*J* values) were reported in Hertz (Hz). High resolution mass was measured by using Autoflex III Smartbeam MALDI-TOF, Bruker. HPLC analysis was performed on Waters-Breeze (2487 Dual  $\lambda$  Absorbance Detector and 1525 Binary HPLC Pump, UV detection monitored at 254nm). Chiralpak AD-H and OD-H columns were purchased from Daicel Chemical Industries, LTD. Column chromatography was performed on silica gel with 100–200 mesh.

## 2. Experimental Section

### 2.1 Preparation and characterization of indol-2-yl carbinols

The 3-methyl indoles<sup>13</sup>, 3-cyclopentyl indole<sup>13</sup> and 3-ethyl indoles<sup>14</sup> were prepared according to known procedures. The general procedure for the preparation of indol-2-yl carbinol substrates was represented by the synthesis of **8a**.

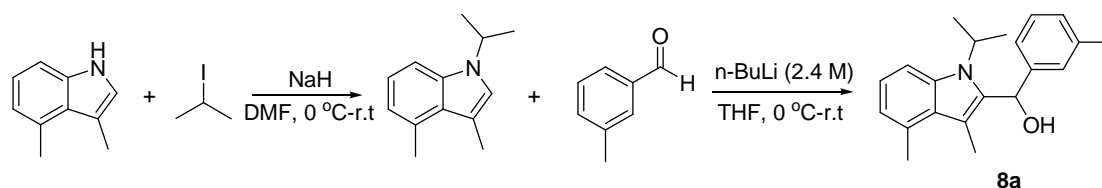

To a DMF solution (15 mL) of 3,4-dimethylindole (1.45 g, 10 mmol) was added NaH (60 percent in mineral oil, 0.8 g, 20 mmol) at 0 °C. The slurry thus formed was gradually warmed to room temperature over a 30 min period. Isopropyl iodide (0.26 g, 15 mmol) was added to the reaction mixture at room temperature and the mixture was stirred for an additional 14 hs. The reaction mixture was then treated with H<sub>2</sub>O (15 mL) and extracted with EtOAc (3 x 20 mL). The combined organic extracts were washed with H<sub>2</sub>O (3 x 20 mL) and dried over anhydrous Na<sub>2</sub>SO<sub>4</sub>. The solvent was removed under reduced pressure and the crude material was purified on silica gel (petroleum:AcOEt = 50:1) to provide

N-isopropyl-3,4-dimethylindole as a colorless oil (1.55 g, 83% yield).

To a solution of N-isopropyl-3,4-dimethylindole (2 mmol, 0.38 g) in dried THF (6 ml) was added *n*-BuLi (2.4 mmol, 2.4 M, 1 ml) at 0 °C. The mixture was stirred for 3 hs at room temperature. Then *m*-methylbenzaldehyde (0.24 g, 2 mmol) was added slowly, and the resulting mixture was stirred for 12 hs at room temperature. The mixture was carefully quenched with saturated *aq.* NH<sub>4</sub>Cl at 0 °C. The organic layer was separated and aqueous layer was extracted with Et<sub>2</sub>O twice. The combined organic layer was washed with brine and dried over anhydrous MgSO<sub>4</sub>. The solvent was removed under reduced pressure and the residue was purified by silica-gel column chromatography to give the corresponding alcohol **8a**.

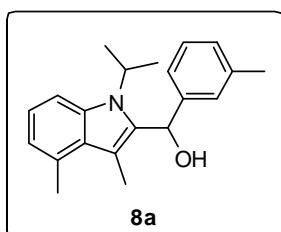

**(N-isopropyl-3,4-dimethyl-indol-2-yl)(*m*-tolyl)methanol:<sup>1</sup>**

<sup>1</sup>H NMR (400 MHz, DMSO) δ 0.87 (d, *J* = 7.2 Hz, 3H), 1.42 (d, *J* = 7.2 Hz, 3H), 2.25 (s, 3H), 2.53 (s, 3H), 2.68 (s, 3H), 4.76 (m, 1H), 6.13 (d, 2H), 6.67 (d, *J* = 7.2 Hz, 1H), 6.88 (t, 1H), 7.05 (m, 3H), 7.17 (d, 1H) 7.25 (d, *J* = 7.8 Hz, 1H); <sup>13</sup>C

NMR (101 MHz, DMSO) δ 143.71, 137.21, 130.89, 128.15, 128.07, 127.41, 127.28, 126.70, 126.11, 122.80, 120.92, 120.00, 110.22, 108.00, 65.02, 47.19, 21.46, 20.85, 20.76, 19.73, 12.04.

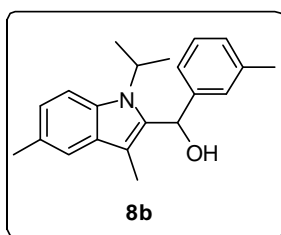

**(N-isopropyl-3,5-dimethyl-indol-2-yl)(*m*-tolyl)methanol:<sup>1</sup>**

<sup>1</sup>H NMR (400 MHz, DMSO) δ 0.88 (d, *J* = 6.8 Hz, 3H), 1.40 (d, *J* = 6.8 Hz, 3H), 2.23 (s, 3H), 2.28 (s, 3H), 2.36 (s, 3H), 4.71 (m, 1H), 6.11 (s, 2H), 6.86 (d, *J* = 8.4 Hz, 1H), 7.04 (m, 3H), 7.17 (m, 1H), 7.28 (s, 1H), 7.30 (d, *J* = 8.4 Hz, 1H); <sup>13</sup>C

NMR (101 MHz, DMSO) δ 143.25, 137.06, 136.87, 132.35, 128.96, 127.82, 126.99, 126.37, 125.86, 122.51, 122.33, 118.47, 111.57, 106.17, 65.25, 46.87, 21.12, 21.02, 20.67, 19.70, 8.68.

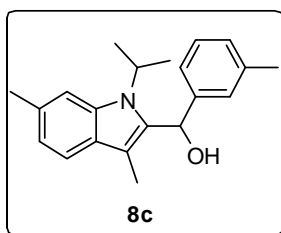

**(N-isopropyl-3,6-dimethyl-indol-2-yl)(*m*-tolyl)methanol:<sup>1</sup>**

<sup>1</sup>H NMR (400 MHz, DMSO) δ 0.91 (d, *J* = 6.8 Hz, 3H), 1.39 (d, *J* = 6.8 Hz, 3H), 2.25 (s, 3H), 2.30 (s, 3H), 2.39 (s, 3H), 4.73 (m, 1H), 6.12 (s, 2H), 6.82 (d, *J* = 8.0 Hz, 1H), 7.06 (m, 3H), 7.18 (t, 1H), 7.24 (s, 1H), 7.39(d, *J* = 8.0 Hz, 1H); <sup>13</sup>C

NMR (101 MHz, DMSO)  $\delta$  143.64, 137.19, 136.69, 134.74, 130.07, 128.14, 127.30, 127.07, 126.21, 122.87, 119.86, 118.88, 112.06, 106.92, 65.61, 47.21, 22.00, 21.45, 20.90, 19.97, 9.04.

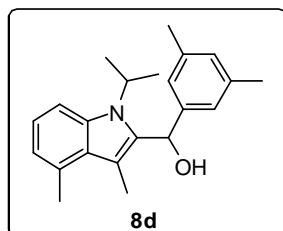

**(N-isopropyl-3,4-dimethyl-indol-2-yl)(3,5-dimethylphenyl)**

**methanol:**  $^1\text{H}$  NMR (600 MHz, DMSO)  $\delta$  0.89 (d,  $J = 6.6$  Hz, 3H), 1.44 (d,  $J = 6.6$  Hz, 3H), 2.20 (s, 6H), 2.52 (s, 3H), 2.67 (s, 3H), 4.74 (m, 1H), 6.08 (d, 2H), 6.66 (d,  $J = 7.2$  Hz, 1H), 6.85 (m, 4H), 7.25 (d,  $J = 8.4$  Hz, 1H);  $^{13}\text{C}$  NMR (151 MHz,

DMSO)  $\delta$  143.42, 136.83, 136.74, 130.63, 127.82, 127.11, 123.63, 123.12, 120.63, 119.73, 109.98, 107.68, 64.74, 46.93, 21.11, 21.05, 20.61, 20.49, 19.51, 11.80.

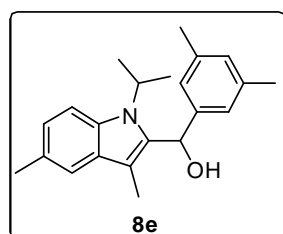

**(N-isopropyl-3,5-dimethyl-indol-2-yl)(3,5-dimethylphenyl)**

**methanol:**  $^1\text{H}$  NMR (600 MHz, DMSO)  $\delta$  0.92 (d,  $J = 6.6$  Hz, 3H), 1.41 (d,  $J = 6.6$  Hz, 3H), 2.23 (s, 6H), 2.27 (s, 3H), 2.36 (s, 3H), 4.71 (m, 1H), 6.05 (s, 2H), 6.81 (d, 1H), 6.85 (s, 2H), 6.88 (s, 1H), 7.27 (s, 1H), 7.32 (d,  $J = 8.4$  Hz, 1H);  $^{13}\text{C}$  NMR

(151 MHz, DMSO)  $\delta$  143.28, 136.81, 132.41, 127.92, 123.63, 123.18, 122.36, 118.55, 111.66, 106.17, 65.29, 46.94, 21.10, 21.05, 20.73, 19.80, 8.77.

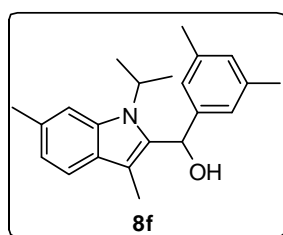

**(N-isopropyl-3,6-dimethyl-indol-2-yl)(3,5-dimethylphenyl)**

**methanol:**  $^1\text{H}$  NMR (600 MHz, DMSO)  $\delta$  0.82 (d,  $J = 6.8$  Hz, 3H), 1.31 (d,  $J = 6.8$  Hz, 3H), 2.10 (s, 6H), 2.19 (s, 3H), 2.28 (s, 3H), 4.60 (m, 1H), 5.96 (s, 2H), 6.72 (m, 3H), 6.78 (s, 1H), 7.13 (s, 1H), 7.28 (d,  $J = 7.8$  Hz, 1H);  $^{13}\text{C}$  NMR (151 MHz,

DMSO)  $\delta$  143.33, 136.80, 136.44, 129.77, 127.84, 126.80, 123.63, 123.20, 119.57, 118.62, 111.82, 106.58, 65.31, 46.94, 21.74, 21.10, 21.05, 20.63, 19.74, 8.80.

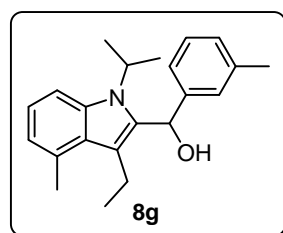

**(N-isopropyl-3-ethyl-4-methyl-indol-2-yl)(m-tolyl)methan**

**ol:**  $^1\text{H}$  NMR (400 MHz, DMSO)  $\delta$  0.89 (d,  $J = 6.8$  Hz, 3H), 1.23 (t, 3H), 1.42 (d,  $J = 6.8$  Hz, 3H), 2.25 (s, 3H), 2.67 (s, 3H), 2.94 (m, 2H), 4.70 (m, 1H), 6.14 (d,  $J = 3.6$  Hz, 1H), 6.18 (d,  $J = 3.6$  Hz, 1H), 6.71 (d,  $J = 7.2$  Hz, 1H), 6.91 (t,

1H), 7.02 (d,  $J = 7.2$  Hz, 1H), 7.07 (d,  $J = 7.2$  Hz, 1H), 7.12 (s, 1H), 7.19 (t, 1H), 7.28

(d,  $J = 8.0$  Hz, 1H);  $^{13}\text{C}$  NMR (101 MHz, DMSO)  $\delta$  143.40, 136.91, 136.50, 134.35, 129.92, 127.83, 127.02, 126.06, 125.92, 122.59, 120.46, 120.03, 114.75, 109.97, 64.67, 46.97, 21.15, 20.43, 20.11, 19.34, 18.41, 18.26.

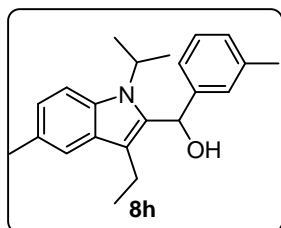

**(N-isopropyl-3-ethyl-5-methyl-indol-2-yl)(m-tolyl)methan**

**ol:**  $^1\text{H}$  NMR (600 MHz, DMSO)  $\delta$  0.88 (d,  $J = 6.6$  Hz, 3H), 1.21 (t, 3H), 1.40 (d,  $J = 6.8$  Hz, 3H), 2.24 (s, 3H), 2.35 (s, 3H), 2.77 (m, 2H), 4.65 (m, 1H), 6.09 (d,  $J = 3.6$  Hz, 1H),

6.14 (d,  $J = 3.6$  Hz, 1H), 6.86 (d,  $J = 9.0$  Hz, 1H), 7.01 (d,  $J = 7.2$  Hz, 1H), 7.04 (d,  $J = 7.2$  Hz, 1H), 7.08 (s, 1H), 7.17 (t, 1H), 7.32 (m, 2H);  $^{13}\text{C}$  NMR (151 MHz, DMSO)  $\delta$  143.35, 136.92, 136.39, 131.52, 128.70, 127.87, 127.07, 126.34, 126.00, 122.63, 122.32, 118.50, 113.41, 111.79, 65.05, 46.96, 21.21, 21.12, 20.69, 19.66, 17.11, 16.56.

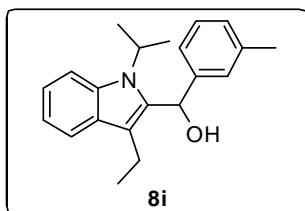

**(N-isopropyl-3-ethyl-indol-2-yl)(m-tolyl)methanol:**  $^1\text{H}$

NMR (400 MHz, DMSO)  $\delta$  0.91 (d,  $J = 6.8$  Hz, 3H), 1.22 (t, 3H), 1.41 (d,  $J = 7.2$  Hz, 3H), 2.24 (s, 3H), 2.80 (m, 2H), 4.70 (m, 1H), 6.12 (d, 1H), 6.16 (d, 1H), 7.00 (m, 4H), 7.09 (s, 1H), 7.18 (t, 1H), 7.44 (d,  $J = 8.0$  Hz, 1H), 7.55 (d,  $J =$

8.0 Hz, 1H);  $^{13}\text{C}$  NMR (101 MHz, DMSO)  $\delta$  143.67, 137.37, 136.75, 134.56, 128.30, 128.22, 127.50, 126.38, 123.03, 121.16, 119.29, 118.31, 114.33, 112.44, 65.51, 47.47, 21.61, 21.03, 20.02, 17.49, 16.95.

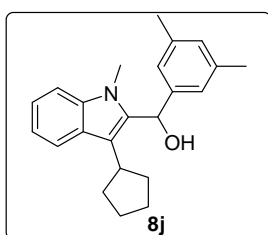

**(N-methyl-3-cyclopentyl-indol-2-yl)(3,5-dimethylphenyl)**

**methanol:**  $^1\text{H}$  NMR (600 MHz, DMSO)  $\delta$  1.66 (m, 4H), 1.95 (m, 4H), 2.23 (s, 6H), 3.42 (m, 1H), 3.47 (s, 3H), 6.09 (d, 1H), 6.17 (d, 1H), 6.85 (s, 1H), 6.93 (s, 2H), 6.99 (t, 1H), 7.10 (t, 1H), 7.30 (d,  $J = 8.4$  Hz, 1H) 7.61 (d,  $J = 8.4$  Hz, 1H);  $^{13}\text{C}$

NMR (151 MHz, DMSO)  $\delta$  143.26, 137.36, 136.93, 127.93, 125.11, 123.63, 123.27, 120.90, 119.63, 118.15, 115.14, 109.36, 65.28, 36.59, 33.38, 32.65, 30.68, 26.05, 21.13, 21.05.

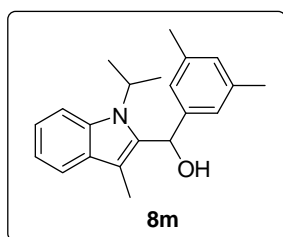

**(N-isopropyl-3-methyl-indol-2-yl)(3,5-dimethylphenyl)methanol:**  $^1\text{H}$  NMR (400 MHz, DMSO)  $\delta$  0.95 (d,  $J = 7.2$  Hz, 3H), 1.44 (d,  $J = 7.2$  Hz, 3H), 2.21 (s, 6H), 2.32 (s, 3H), 4.76 (m, 1H), 6.12 (d, 2H), 6.85 (d, 3H), 7.02 (dt, 2H), 7.46 (d,  $J = 7.8$  Hz, 1H) 7.51 (d,  $J = 7.8$  Hz, 1H);  $^{13}\text{C}$  NMR (101 MHz, DMSO)  $\delta$  143.47, 137.37, 137.11, 134.29, 129.06, 128.16, 123.43, 121.08, 119.16, 118.13, 112.18, 106.99, 65.54, 47.32, 21.36, 20.91, 20.02, 9.02.

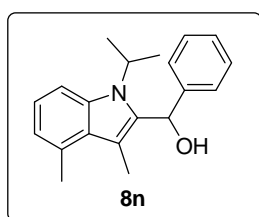

**(N-isopropyl-3,4-dimethyl-indol-2-yl)(phenyl)methanol:**  $^1\text{H}$  NMR (400 MHz, DMSO)  $\delta$  0.82 (d,  $J = 6.8$  Hz, 3H), 1.40 (d,  $J = 6.8$  Hz, 3H), 2.55 (s, 3H), 2.67 (s, 3H), 4.76 (m, 1H), 6.19 (d, 2H), 6.67 (d,  $J = 7.2$  Hz, 1H), 6.86 (t, 1H), 7.25 (m, 6H);  $^{13}\text{C}$  NMR (101 MHz, DMSO)  $\delta$  143.43, 136.73, 130.57, 127.89, 126.46, 126.28, 125.75, 125.28, 120.63, 119.69, 109.88, 107.74, 64.74, 46.88, 20.52, 20.46, 19.35, 11.70.

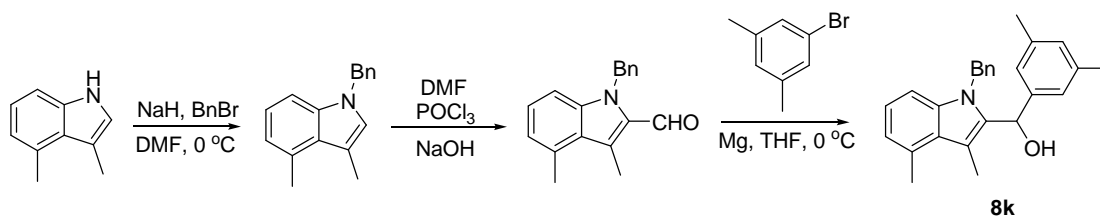

**Synthesis of 8k:** A solution of 3,4-dimethylindole (1.45 g, 10 mmol) in DMF (15 mL) at 0 °C was treated with NaH (60 percent in mineral oil, 0.8 g, 20 mmol) in 4 portions providing a slurry that was gradually warmed to room temperature over a 30 min period. BnBr (1.70 g, 10 mmol) was added to the reaction mixture slowly at 0 °C and the mixture was stirred for 1 h. The reaction mixture was then treated with H<sub>2</sub>O (15 mL) and extracted with AcOEt (3 x 20 mL). The combined organic extracts were washed with H<sub>2</sub>O (3 x 20 mL) and dried over anhydrous Na<sub>2</sub>SO<sub>4</sub>. The solvent was removed under reduced pressure and the crude material was purified on silica gel (petroleum:AcOEt = 25:1) to provide N-Bn-3,4-dimethylindole as a white solid (2.14 g, 91% yield).

A three-necked flask was charged with N-Bn-3,4-dimethylindole (4 mmol) and DMF (30 mmol). The mixture was stirred and cooled to 0 °C, then the freshly distilled POCl<sub>3</sub> (8 mmol) was added dropwise in 10 min. The solution was then heated at 40 °C for 2 hs. Then 2M NaOH aqueous solution (30 mL) was added slowly and the

reaction mixture was heated further at 90 °C for 1 h. AcOEt (20 mL) was added to dissolve the solid, and the aqueous layer was extracted with AcOEt (2 × 20 mL). The combined organic phase was washed with brine, dried over Na<sub>2</sub>SO<sub>4</sub>, separated, evaporated under reduced pressure. The crude material was purified on silica gel (petroleum:AcOEt = 10:1) to provide the N-Bn-3,4-dimethylindole-2-carbaldehyde as a white solid (0.74 g, 70% yield).

To a solution of the 3,5-dimethylphenyl magnesium bromide [prepared from magnesium turnings (1.5 equiv), 1-bromo-3,5-dimethyl benzene (1.5 equiv) and a catalytic amount of I<sub>2</sub> in dry THF] was added dropwise the N-Bn-3,4-dimethylindole-2-carbaldehyde (1 mmol) in dried THF at 0 °C through a dropping funnel. The mixture was stirred for 30 min at room temperature. The reaction mixture was then quenched with aq. NH<sub>4</sub>Cl solution and extracted with AcOEt. Organic layer was dried over sodium sulfate and the solvent was removed under reduced pressure. The crude material was purified by flash chromatography over silica gel column to provide the indol-2-yl carbinol **8g** as a white solid (0.35 g, 95% yield).

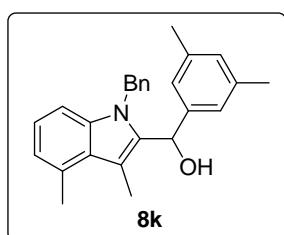

**(N-Bn-3,4-dimethyl-indol-2-yl)(3,5-dimethylphenyl)methanol:** <sup>1</sup>H NMR (400 MHz, DMSO) δ 2.11 (s, 6H), 2.55 (s, 3H), 2.67 (s, 3H), 5.72 (dd, 2H), 6.05 (d, *J* = 4.0 Hz, 1H), 6.14 (d, *J* = 4.0 Hz, 1H), 6.67 (m, 2H), 6.80 (m, 6H), 7.08 (m, 3H);

<sup>13</sup>C NMR (101 MHz, DMSO) δ 143.45, 138.88, 137.81, 137.09, 136.86, 130.63, 128.06, 126.64, 126.44, 123.52, 121.50, 120.70, 108.54, 108.33, 65.50, 47.42, 21.30, 20.56, 12.04.

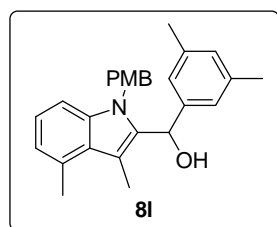

**(N-PMB-3,4-dimethyl-indol-2-yl)(3,5-dimethylphenyl)methanol:** <sup>1</sup>H NMR (400 MHz, DMSO) δ 2.13 (s, 6H), 2.53 (s, 3H), 2.66 (s, 3H), 3.64 (s, 3H), 5.18 (s, 2H), 6.07 (d, *J* = 4.0 Hz, 1H), 6.13 (d, *J* = 4.0 Hz, 1H), 6.67 (m, 3H), 6.72 (s, 1H), 6.79 (m, 6H); <sup>13</sup>C NMR (101 MHz, Acetone) δ 158.29, 143.67,

137.87, 137.21, 136.92, 130.92, 130.69, 128.19, 127.91, 126.78, 123.63, 121.53, 120.73, 113.67, 108.56, 65.63, 55.35, 47.01, 21.42, 20.67, 12.14.

### 2.3 General procedure and product characterization of the asymmetric reaction

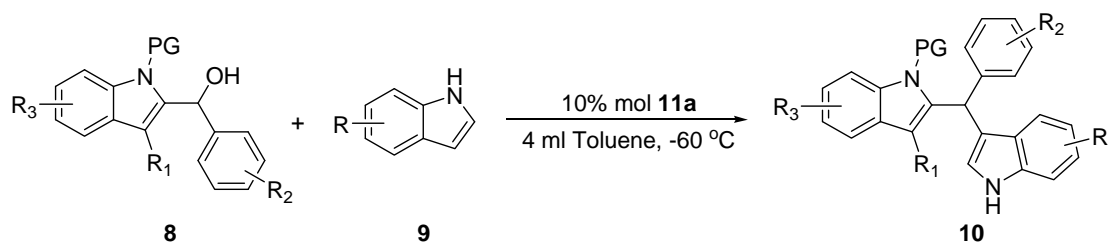

A 10 ml Schlenk tube equipped with a magnetic bar was charged with alcohol **8** (0.1 mmol), indole **9** (0.1 mmol, 1 eq) and catalyst **11a** (4.8 mg, 0.01 mmol) at  $-60\text{ }^{\circ}\text{C}$ . Then toluene solvent (4 ml) was added and the solution was stirred until the alcohol **8** had disappeared as monitored by TLC. Then one drop of pyridine was added to quench the reaction. The solvent was removed under reduced pressure and the crude mixture was purified by silical gel chromatography to afford the products **10**.

### Structures of catalysts

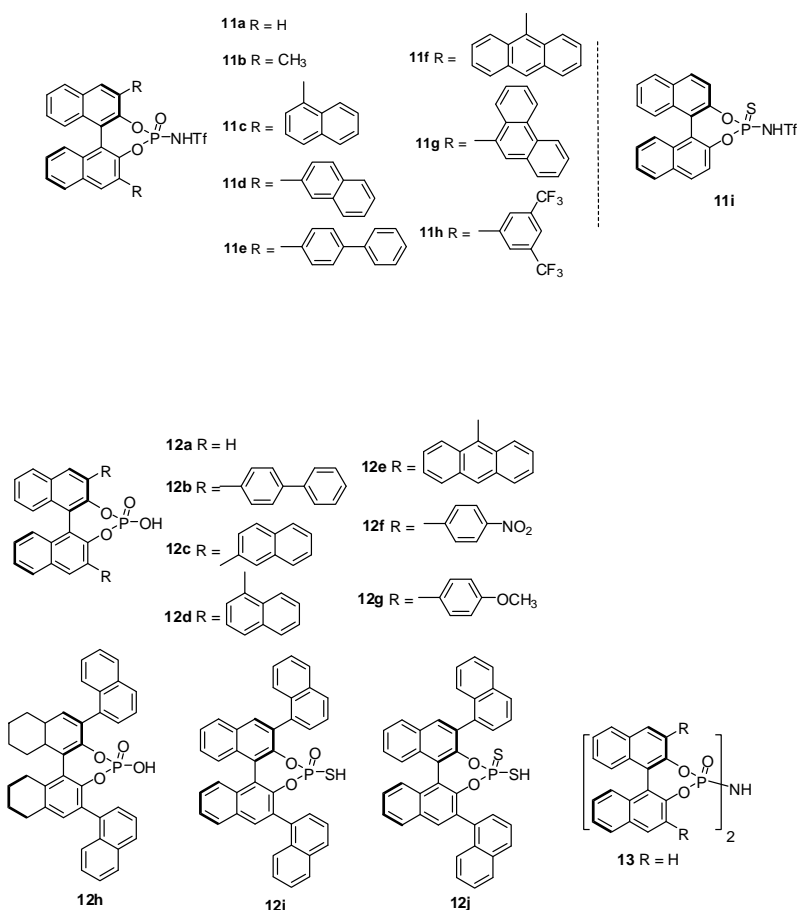



**Table S1. Screening of Catalysts.<sup>a</sup>**

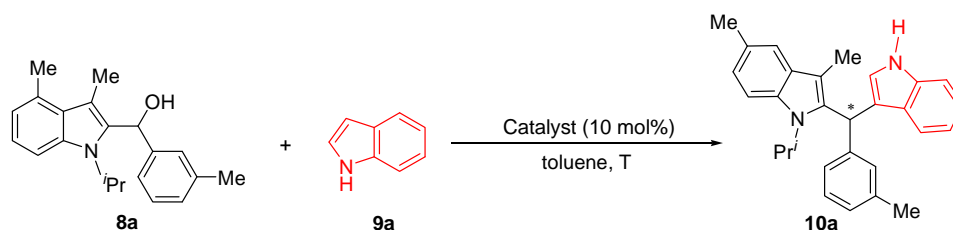

| Entry    | Catalyst   | T (°C)/t (h) | Yield (%) <sup>b</sup> | Ee (%) <sup>c</sup> |
|----------|------------|--------------|------------------------|---------------------|
| <b>1</b> | <b>11a</b> | <b>-60/3</b> | <b>92</b>              | <b>91</b>           |
| 2        | <b>11b</b> | -60/3        | 91                     | -7                  |
| 3        | <b>11c</b> | -60/12       | 77                     | -12                 |
| 4        | <b>11d</b> | -60/12       | 79                     | 9                   |
| 5        | <b>11e</b> | -60/12       | 82                     | -6                  |
| 6        | <b>11f</b> | -60/12       | 69                     | -26                 |
| 7        | <b>11g</b> | -60/12       | 75                     | -14                 |
| 8        | <b>11h</b> | -60/6        | 94                     | -15                 |
| 9        | <b>11i</b> | -60/12       | 90                     | 9                   |
| 10       | <b>12a</b> | r.t/10       | 80                     | 2 <sup>d</sup>      |
| 11       | <b>12b</b> | r.t/10       | 85                     | 25                  |
| 12       | <b>12c</b> | r.t/10       | 85                     | 12                  |
| 13       | <b>12d</b> | r.t/10       | 80                     | 3                   |
| 14       | <b>12e</b> | r.t/10       | 55                     | 1                   |
| 15       | <b>12f</b> | r.t/10       | 88                     | 18                  |
| 16       | <b>12g</b> | r.t/10       | 83                     | 17                  |
| 17       | <b>12h</b> | r.t/10       | 84                     | 2                   |
| 18       | <b>12i</b> | r.t/10       | Trace                  |                     |
| 19       | <b>12j</b> | r.t/10       | N.R.                   |                     |
| 20       | <b>13</b>  | r.t/10       | 89                     | 10                  |

<sup>a</sup> Reaction reactions: Indol-2-yl carbinol **8a** (0.05 mmol), indole **9a** (0.05 mmol), catalyst (10 mol%) in toluene (2 mL). <sup>b</sup> Isolated yield. <sup>c</sup> The ee value was determined by HPLC on AD-H column. <sup>d</sup> The reaction almost did not proceed at 0 °C for catalysts **12** and **13**.

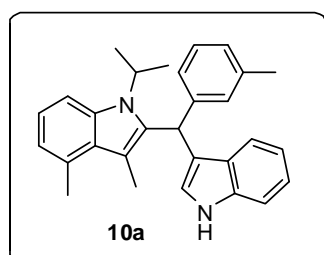

**(10a)**: yield: 92%; ee: 91%; (purified by flash column chromatography with petroleum ether and DCM eluents, v/v = 2.5/1); <sup>1</sup>H-NMR (d<sub>6</sub>-DMSO, 400 MHz) δ (ppm) 1.15 (m, 6H), 2.24 (s, 3H), 2.33 (s, 3H), 2.63 (s, 3H), 4.74 (m, 1H), 6.13 (s, 1H), 6.66 (d, *J* = 6.9 Hz, 1H), 6.80 (s, 1H), 6.88 (m, 2H), 7.05 (m, 5H), 7.20 (t, 1H), 7.28 (d, *J* = 8.1 Hz, 1H), 7.38 (d, *J* =

8.1 Hz, 1H), 10.96 (s, 1H);  $^{13}\text{C}$  NMR (151 MHz,  $\text{d}_6$ -Acetone)  $\delta$  141.67, 137.04, 136.72, 136.22, 134.33, 129.97, 129.02, 127.67, 127.56, 127.00, 126.39, 125.54, 123.74, 121.13, 119.72, 118.92, 118.35, 115.35, 111.02, 109.57, 46.88, 38.86, 20.23, 19.95, 19.48, 11.31. HRMS calcd. for  $\text{C}_{29}\text{H}_{30}\text{N}_2$  ( $\text{M}^+$ ): 406.2409, found: 406.2417; The enantiomeric excess of 91% ee was determined by HPLC [Daicel Chirapak AD-H, hexane/isopropanol = 95/5, flow rate 1 mL/min,  $T = 30\text{ }^\circ\text{C}$ , 254 nm,  $t\text{R}(\text{minor})$  6.866 min,  $t\text{R}(\text{major})$  9.745 min].

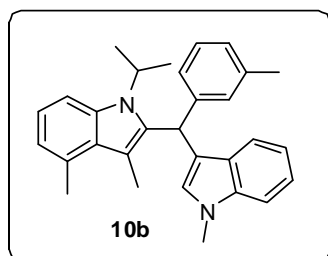

**(10b)**: yield: 90%; ee: 9%; (purified by flash column chromatography with petroleum ether and DCM eluents,  $v/v = 4/1$ );  $^1\text{H}$ -NMR ( $\text{d}_6$ -DMSO, 400 MHz)  $\delta$  (ppm) 1.15 (m, 6H), 2.23 (s, 3H), 2.33 (s, 3H), 2.63 (s, 3H), 3.71 (s, 3H), 4.71 (m, 1H), 6.12 (s, 1H), 6.66 (d,  $J = 6.9$  Hz, 1H), 6.93 (m, 6H), 7.17 (m, 3H), 7.29 (d,  $J = 8.4$  Hz, 1H), 7.42 (d,  $J = 8.4$  Hz, 1H);  $^{13}\text{C}$  NMR (101 MHz,  $\text{d}_6$ -Acetone)  $\delta$  141.88, 137.45, 137.30, 136.51, 130.23, 129.82, 129.26, 128.39, 127.82, 127.62, 126.65, 125.79, 123.73, 122.45, 121.34, 119.99, 119.42, 118.51, 114.52, 109.79, 109.44, 109.26, 47.13, 38.98, 31.74, 20.48, 20.18, 19.70, 11.60. HRMS calcd. for  $\text{C}_{30}\text{H}_{32}\text{N}_2$  ( $\text{M}^+$ ): 420.2565, found: 420.2544; The enantiomeric excess of 9% ee was determined by HPLC [Daicel Chirapak AD-H, hexane/isopropanol = 95/5, flow rate 0.5 mL/min,  $T = 30\text{ }^\circ\text{C}$ , 254 nm,  $t\text{R}(\text{minor})$  5.418 min,  $t\text{R}(\text{major})$  6.249 min].

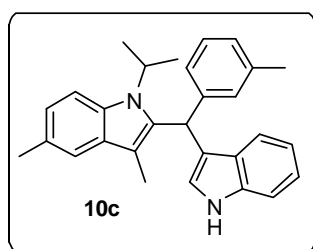

**(10c)**: yield: 93%; ee: 87%; (purified by flash column chromatography with petroleum ether and DCM eluents,  $v/v = 2.5/1$ );  $^1\text{H}$ -NMR ( $\text{d}_6$ -DMSO, 400 MHz)  $\delta$  (ppm) 1.20 (m, 6H), 1.85 (s, 3H), 2.24 (s, 3H), 2.35 (s, 3H), 4.70 (m, 1H), 6.05 (s, 1H), 6.68 (s, 1H), 6.86 (t, 2H), 7.05 (m, 5H), 7.19 (t, 2H), 7.37 (m, 2H), 10.93 (s, 1H);  $^{13}\text{C}$  NMR (151 MHz,  $\text{d}_6$ -Acetone)  $\delta$  141.72, 137.07, 136.75, 136.20, 132.30, 129.87, 129.10, 127.60, 126.98, 126.49, 126.21, 125.60, 123.77, 121.42, 121.12, 118.73, 118.34, 117.66, 115.85, 111.00, 106.31, 46.62, 39.68, 20.24, 20.18, 20.06, 8.01. HRMS calcd. for  $\text{C}_{29}\text{H}_{30}\text{N}_2$  ( $\text{M}^+$ ): 406.2409, found: 406.2397; The enantiomeric excess of 87% ee was determined by HPLC [Daicel Chirapak OD-H, hexane/isopropanol = 95/5, flow rate 0.5 mL/min,  $T = 30\text{ }^\circ\text{C}$ , 254 nm,  $t\text{R}(\text{minor})$  7.556 min,  $t\text{R}(\text{major})$  13.387 min].

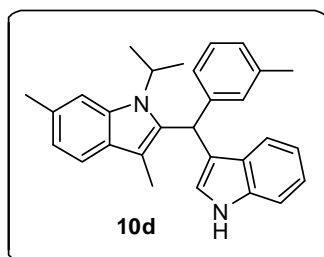

**(10d)**: yield: 91%; ee: 90%; (purified by flash column chromatography with petroleum ether and DCM eluents, v/v = 2.5/1);  $^1\text{H-NMR}$  ( $\text{CDCl}_3$ , 400 MHz)  $\delta$  (ppm) 1.30 (m, 6H), 1.94 (s, 3H), 2.26 (s, 3H), 2.48 (s, 3H), 4.66 (m, 1H), 6.01 (s, 1H), 6.66 (s, 1H), 6.91 (d,  $J = 8.0$  Hz, 1H), 7.01 (m, 3H), 7.06 (s, 1H), 7.16 (m, 2H), 7.28 (m, 2H), 7.35 (d,  $J = 8.0$  Hz, 1H), 7.42 (d,  $J = 8.0$  Hz, 1H), 7.94 (s, 1H);  $^{13}\text{C NMR}$  (101 MHz,  $\text{d}_6$ -Acetone)  $\delta$  142.03, 137.32, 137.01, 135.65, 134.57, 129.35, 127.84, 127.24, 126.73, 125.86, 124.03, 121.36, 119.44, 118.99, 118.59, 117.84, 116.16, 111.55, 111.25, 106.93, 46.85, 39.95, 21.05, 20.49, 20.24, 8.28. HRMS calcd. for  $\text{C}_{29}\text{H}_{30}\text{N}_2$  ( $\text{M}^+$ ): 406.2409, found: 406.2413; The enantiomeric excess of 89% ee was determined by HPLC [Daicel Chirapak OJ-H, hexane/isopropanol = 97/3, flow rate 0.3 mL/min,  $T = 30$  °C, 254 nm,  $t\text{R}(\text{minor})$  25.029 min,  $t\text{R}(\text{major})$  26.567 min].

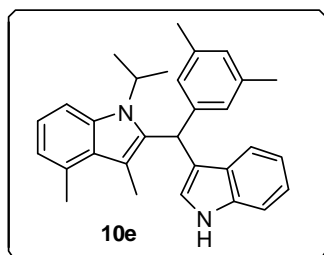

**(10e)**: yield: 92%; ee: 96%; (purified by flash column chromatography with petroleum ether and DCM eluents, v/v = 2.5/1);  $^1\text{H-NMR}$  ( $\text{d}_6$ -DMSO, 400 MHz)  $\delta$  (ppm) 1.11 (m, 6H), 2.19 (s, 3H), 2.35 (s, 6H), 2.63 (s, 3H), 4.74 (m, 1H), 6.09 (s, 1H), 6.66 (d,  $J = 6.2$  Hz, 1H), 6.85 (m, 6H), 7.08 (m, 2H), 7.28 (d,  $J = 8.4$  Hz, 1H), 7.37 (d,  $J = 7.8$  Hz, 1H), 10.95 (s, 1H);  $^{13}\text{C NMR}$  (151 MHz,  $\text{d}_6$ -Acetone)  $\delta$  141.54, 136.88, 136.69, 136.23, 134.34, 129.96, 127.68, 127.24, 127.05, 126.80, 126.21, 123.70, 121.10, 119.70, 118.91, 118.33, 115.53, 111.00, 109.57, 107.50, 46.89, 38.80, 20.15, 19.96, 19.80, 19.54, 11.35. HRMS calcd. for  $\text{C}_{30}\text{H}_{32}\text{N}_2$  ( $\text{M}^+$ ): 420.2565, found: 420.2551; The enantiomeric excess of 96% ee was determined by HPLC [Daicel Chirapak AD-H, hexane/isopropanol = 95/5, flow rate 0.5 mL/min,  $T = 30$  °C, 254 nm,  $t\text{R}(\text{minor})$  10.586 min,  $t\text{R}(\text{major})$  13.643 min].

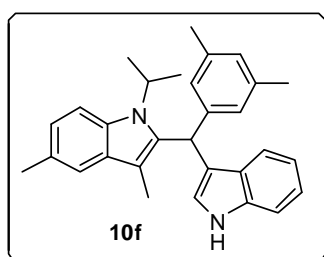

**(10f)**: yield: 92%; ee: 89%; (purified by flash column chromatography with petroleum ether and DCM eluents, v/v = 2.5/1);  $^1\text{H-NMR}$  ( $\text{d}_6$ -DMSO, 400 MHz)  $\delta$  (ppm) 1.19 (m, 6H), 1.87 (s, 3H), 2.19 (s, 6H), 2.35 (s, 3H), 4.70 (m, 1H), 6.01 (s, 1H), 6.70 (s, 1H), 6.85 (m, 5H), 7.06 (m, 2H), 7.20 (s, 1H), 7.36 (d,  $J = 5.1$  Hz, 2H), 10.92 (s, 1H);  $^{13}\text{C NMR}$  (151 MHz,

$d_6$ -Acetone)  $\delta$  141.61, 136.90, 136.71, 136.24, 132.28, 129.86, 127.30, 127.01, 126.25, 126.16, 123.74, 121.35, 121.06, 118.70, 118.29, 117.65, 115.96, 110.96, 46.61, 39.60, 20.13, 19.99, 8.00. HRMS calcd. for  $C_{30}H_{32}N_2$  ( $M^+$ ): 420.2565, found: 420.2552; The enantiomeric excess of 89% ee was determined by HPLC [Daicel Chirapak OD-H, hexane/isopropanol = 9/1, flow rate 0.5 mL/min, T = 30 °C, 254 nm, tR(minor) 8.520 min, tR(major) 12.907 min].

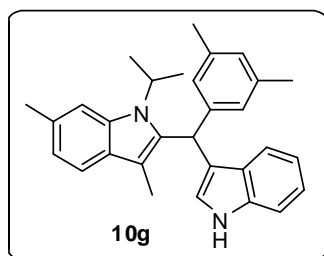

**(10g):** yield: 94%; ee: 91%; (purified by flash column chromatography with petroleum ether and DCM eluents, v/v = 2.5/1);  $^1H$ -NMR ( $d_6$ -DMSO, 400 MHz)  $\delta$  (ppm) 1.21 (m, 6H), 1.87 (s, 3H), 2.19 (s, 6H), 2.38 (s, 3H), 4.70 (m, 1H), 6.00 (s, 1H), 6.70 (s, 1H), 6.81 (m, 5H), 7.06 (m, 2H), 7.28 (m, 2H), 7.37 (d,  $J$  = 8.1 Hz, 1H), 10.92 (s, 1H);  $^{13}C$  NMR (101 MHz,  $d_6$ -Acetone)  $\delta$  141.92, 137.15, 136.97, 135.75, 134.31, 129.30, 127.86, 127.56, 127.28, 126.52, 124.01, 121.32, 119.41, 118.97, 118.55, 117.84, 116.28, 111.55, 111.22, 106.67, 46.86, 39.88, 21.04, 20.39, 20.21, 8.30. HRMS calcd. for  $C_{30}H_{32}N_2$  ( $M^+$ ): 420.2565, found: 420.2551; The enantiomeric excess of 91% ee was determined by HPLC [Daicel Chirapak OD-H, hexane/isopropanol = 95/5, flow rate 0.5 mL/min, T = 30 °C, 254 nm, tR(minor) 22.115 min, tR(major) 18.284 min].

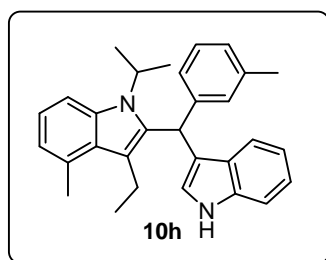

**(10h):** yield: 91%; ee: 82%; (purified by flash column chromatography with petroleum ether and DCM eluents, v/v = 2.5/1);  $^1H$ -NMR ( $d_6$ -DMSO, 400 MHz)  $\delta$  (ppm) 0.97 (m, 6H), 1.17 (d,  $J$  = 6.0 Hz, 3H), 2.22 (s, 3H), 2.64 (s, 3H), 2.84 (m, 2H), 4.67 (m, 1H), 6.14 (s, 1H), 6.71 (d,  $J$  = 6.9 Hz, 1H), 6.81 (s, 1H), 6.90 (m, 2H), 7.08 (m, 6H), 7.30 (d,  $J$  = 8.1 Hz, 1H), 7.39 (d,  $J$  = 8.1 Hz, 1H), 10.97 (s, 1H);  $^{13}C$  NMR (101 MHz, Acetone)  $\delta$  141.56, 136.94, 136.66, 136.32, 134.36, 129.34, 129.10, 127.45, 126.92, 126.62, 126.31, 125.59, 123.77, 121.08, 119.97, 119.54, 119.07, 118.29, 114.98, 114.28, 111.01, 109.58, 47.10, 38.58, 20.15, 19.77, 19.42, 19.18, 18.39, 16.74. HRMS calcd. for  $C_{30}H_{32}N_2$  ( $M^+$ ): 420.2565, found: 420.2552; The enantiomeric excess of 82% ee was determined by HPLC [Daicel Chirapak AD-H, hexane/isopropanol = 95/5, flow rate 0.5 mL/min, T = 30 °C, 254 nm, tR(minor) 12.093 min, tR(major) 16.363 min].

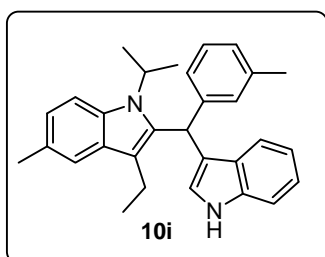

**(10i)**: yield: 88%; ee: 85%; (purified by flash column chromatography with petroleum ether and DCM eluents, v/v = 2.5/1);  $^1\text{H-NMR}$  ( $d_6$ -DMSO, 400 MHz)  $\delta$  (ppm) 0.84 (m, 3H), 1.17 (m, 6H), 2.23 (s, 3H), 2.36 (s, 3H), 2.45 (m, 2H), 4.65 (m, 1H), 6.07 (s, 1H), 6.73 (s, 1H), 6.86 (t, 2H), 6.98 (d,  $J = 7.5$  Hz, 1H), 7.08 (m, 4H), 7.19 (t, 1H), 7.25 (s, 1H), 7.37 (t, 2H), 10.94 (s, 1H);  $^{13}\text{C NMR}$  (101 MHz, Acetone)  $\delta$  141.62, 136.92, 136.67, 135.83, 132.25, 129.11, 128.82, 127.45, 126.88, 126.37, 126.18, 125.56, 123.76, 121.31, 121.07, 118.90, 118.24, 117.78, 115.37, 113.14, 111.12, 110.97, 46.73, 39.29, 20.14, 19.97, 19.70, 16.97, 14.72. HRMS calcd. for  $\text{C}_{30}\text{H}_{32}\text{N}_2$  ( $\text{M}^+$ ): 420.2565, found: 420.2557; The enantiomeric excess of 85% ee was determined by HPLC [Daicel Chirapak AD-H, hexane/isopropanol = 95/5, flow rate 0.5 mL/min,  $T = 30$  °C, 254 nm,  $t_R(\text{minor})$  11.580 min,  $t_R(\text{major})$  16.663 min].

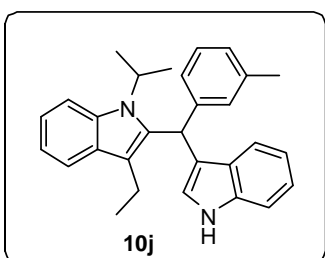

**(10j)**: yield: 94%; ee: 84%; (purified by flash column chromatography with petroleum ether and DCM eluents, v/v = 2.5/1);  $^1\text{H-NMR}$  ( $d_6$ -DMSO, 400 MHz)  $\delta$  (ppm) 0.85 (t, 3H), 1.19 (m, 6H), 2.23 (s, 3H), 2.51 (m, 2H), 4.69 (m, 1H), 6.10 (s, 1H), 6.74 (d,  $J = 6.2$  Hz, 1H), 6.87 (t, 1H), 7.05 (m, 8H), 7.38 (d,  $J = 8.1$  Hz, 1H), 7.48 (m, 2H), 10.96 (s, 1H);  $^{13}\text{C NMR}$  (101 MHz,  $d_6$ -Acetone)  $\delta$  141.55, 136.97, 136.68, 135.80, 134.08, 129.13, 128.57, 127.49, 126.86, 126.42, 125.58, 123.83, 121.10, 119.78, 118.88, 118.27, 118.00, 117.51, 115.29, 113.66, 111.41, 111.00, 46.83, 39.31, 20.15, 19.93, 19.67, 16.96, 14.71. HRMS calcd. for  $\text{C}_{29}\text{H}_{30}\text{N}_2$  ( $\text{M}^+$ ): 406.2409, found: 406.2398; The enantiomeric excess of 84% ee was determined by HPLC [Daicel Chirapak AD-H, hexane/isopropanol = 95/5, flow rate 0.5 mL/min,  $T = 30$  °C, 254 nm,  $t_R(\text{minor})$  13.091 min,  $t_R(\text{major})$  22.664 min].

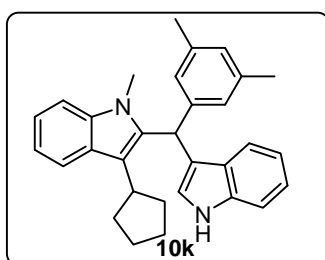

**(10k)**: yield: 95%; ee: 80%; (purified by flash column chromatography with petroleum ether and DCM eluents, v/v = 2.5/1);  $^1\text{H-NMR}$  ( $d_6$ -DMSO, 400 MHz)  $\delta$  (ppm) 1.34 (m, 4H), 1.73 (m, 4H), 2.19 (s, 6H), 3.07 (m, 1H), 3.57 (s, 3H), 6.04 (s, 1H), 6.64 (s, 1H), 6.85 (m, 4H),

6.94 (t, 1H), 7.07 (m, 3H), 7.36 (t, 2H), 7.48 (d,  $J = 7.8$  Hz, 1H), 10.89 (s, 1H);  $^{13}\text{C}$  NMR (101 MHz, Acetone)  $\delta$  141.98, 137.52, 137.18, 137.04, 127.55, 127.13, 126.47, 126.22, 123.97, 121.38, 120.22, 119.47, 119.18, 118.48, 117.87, 116.26, 115.22, 111.21, 109.41, 109.06, 39.35, 36.89, 32.19, 32.03, 29.76, 25.99, 25.95, 20.39. HRMS calcd. for  $\text{C}_{31}\text{H}_{32}\text{N}_2$  ( $\text{M}^+$ ): 432.2565, found: 432.2555; The enantiomeric excess of 80% ee was determined by HPLC [Daicel Chirapak AD-H, hexane/isopropanol = 95/5, flow rate 0.5 mL/min,  $T = 30$  °C, 254 nm,  $t_R(\text{minor})$  13.748 min,  $t_R(\text{major})$  15.763 min].

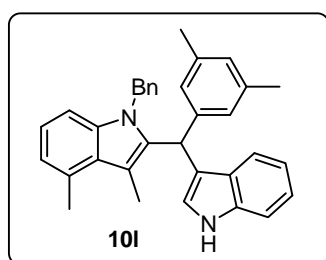

**(10l)**: yield: 95%; ee: 83%; (purified by flash column chromatography with petroleum ether and DCM eluents,  $v/v = 2.5/1$ );  $^1\text{H}$ -NMR ( $d_6$ -DMSO, 400 MHz)  $\delta$  (ppm) 2.11 (s, 3H), 2.12 (s, 6H), 2.61 (s, 3H), 5.32 (s, 2H), 5.81 (s, 1H), 6.60 (s, 1H), 6.70 (m, 3H), 6.85 (m, 6H), 7.05 (m, 2H), 7.18 (m, 3H), 7.34 (d,  $J = 8.1$  Hz, 1H)), 10.88 (s, 1H);  $^{13}\text{C}$  NMR (101 MHz,  $d_6$ -Acetone)  $\delta$  141.85, 138.70, 137.28, 137.13, 136.78, 130.29, 128.16, 127.67, 127.24, 126.71, 126.53, 126.06, 124.31, 121.43, 121.00, 120.81, 119.02, 118.67, 116.04, 111.33, 109.17, 107.48, 46.72, 39.69, 20.49, 20.02, 11.40. HRMS calcd. for  $\text{C}_{34}\text{H}_{32}\text{N}_2$  ( $\text{M}^+$ ): 468.2565, found: 468.2543; The enantiomeric excess of 83% ee was determined by HPLC [Daicel Chirapak AD-H, hexane/isopropanol = 95/5, flow rate 0.5 mL/min,  $T = 30$  °C, 254 nm,  $t_R(\text{minor})$  14.259 min,  $t_R(\text{major})$  17.174 min].

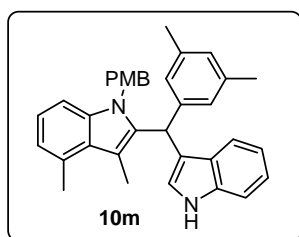

**(10m)**: yield: 91%; ee: 81%; (purified by flash column chromatography with petroleum ether and DCM eluents,  $v/v = 1.5/1$ );  $^1\text{H}$ -NMR ( $d_6$ -DMSO, 400 MHz)  $\delta$  (ppm) 2.09 (s, 3H), 2.13 (s, 6H), 2.60 (s, 3H), 3.66 (s, 3H), 5.24 (s, 2H), 5.82 (s, 1H), 6.59 (s, 1H), 6.73 (m, 9H), 6.89 (m, 2H), 7.04 (t, 1H), 7.11 (d,  $J = 8.1$  Hz, 1H), 7.34 (d,  $J = 8.1$  Hz, 1H)), 10.86 (s, 1H);  $^{13}\text{C}$  NMR (101 MHz, Acetone)  $\delta$  158.81, 141.93, 137.24, 137.14, 136.81, 130.58, 130.22, 127.60, 127.27, 126.52, 124.26, 121.38, 120.89, 120.71, 119.02, 118.63, 116.15, 113.62, 111.26, 109.14, 107.48, 54.54, 46.20, 39.69, 20.43, 19.93, 11.38. HRMS calcd. for  $\text{C}_{35}\text{H}_{34}\text{N}_2\text{O}$  ( $\text{M}^+$ ): 498.2671, found: 498.2627; The enantiomeric excess of 81% ee was determined by HPLC [Daicel Chirapak AD-H, hexane/isopropanol = 95/5, flow

rate 1 mL/min, T = 30 °C, 254 nm, tR(minor) 10.111 min, tR(major) 12.127 min].

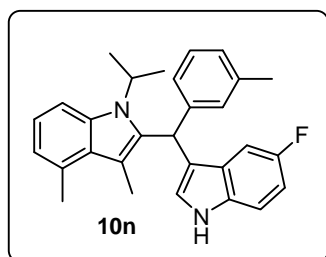

**(10n):** yield: 91%; ee: 90%; (purified by flash column chromatography with petroleum ether and DCM eluents, v/v = 2.5/1); <sup>1</sup>H-NMR (d<sub>6</sub>-Acetone, 400 MHz) δ (ppm) 1.24 (m, 6H), 2.26 (s, 3H), 2.39 (s, 3H), 2.68 (s, 3H), 4.83 (m, 1H), 6.17 (s, 1H), 6.69 (d, *J* = 6.8 Hz, 1H), 6.92 (m, 4H), 7.07 (t, 2H), 7.15 (s, 1H), 7.19 (t, 1H), 7.32 (d, *J* = 8.4 Hz, 1H), 7.44 (m, 1H), 10.26 (s, 1H); <sup>13</sup>C NMR (101 MHz, d<sub>6</sub>-Acetone) δ 158.28, 155.96, 141.56, 137.40, 136.09, 133.55, 130.28, 129.23, 127.89, 126.76, 126.07, 125.71, 120.09, 120.04, 115.89, 112.29, 112.19, 109.60, 109.34, 103.88, 103.64, 47.13, 39.01, 20.47, 20.18, 19.86, 11.55. HRMS calcd. for C<sub>29</sub>H<sub>29</sub>FN<sub>2</sub> (M<sup>+</sup>): 424.2315, found: 424.2309; The enantiomeric excess of 90% ee was determined by HPLC [Daicel Chirapak AD-H, hexane/isopropanol = 95/5, flow rate 1.0 mL/min, T = 30 °C, 254 nm, tR(minor) 6.869 min, tR(major) 8.879 min].

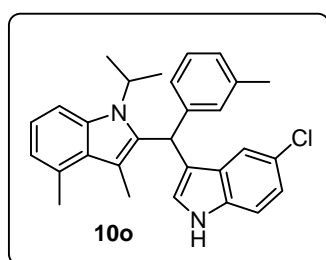

**(10o):** yield: 93%; ee: 88%; (purified by flash column chromatography with petroleum ether and DCM eluents, v/v = 2.5/1); <sup>1</sup>H-NMR (d<sub>6</sub>-DMSO, 400 MHz) δ (ppm) 1.16 (m, 6H), 2.24 (s, 3H), 2.30 (s, 3H), 2.63 (s, 3H), 4.71 (m, 1H), 6.14 (s, 1H), 6.67 (d, *J* = 7.2 Hz, 1H), 6.87 (m, 2H), 6.95 (d, 1H), 7.07 (m, 4H), 7.20 (t, 1H), 7.30 (d, *J* = 8.1 Hz, 1H), 7.41 (d, *J* = 8.4 Hz, 1H), 11.19 (s, 1H); <sup>13</sup>C NMR (151 MHz, d<sub>6</sub>-Acetone) δ 141.35, 137.17, 135.83, 135.14, 134.40, 130.03, 129.57, 128.98, 128.09, 127.64, 126.53, 125.65, 125.43, 123.68, 121.23, 119.86, 119.80, 118.22, 115.25, 112.51, 109.58, 107.75, 46.87, 38.62, 20.23, 19.94, 19.49, 11.31. HRMS calcd. for C<sub>29</sub>H<sub>29</sub>ClN<sub>2</sub> (M<sup>+</sup>): 440.2019, found: 440.2006; The enantiomeric excess of 88% ee was determined by HPLC [Daicel Chirapak AD-H, hexane/isopropanol = 95/5, flow rate 1.0 mL/min, T = 30 °C, 254 nm, tR(minor) 6.433 min, tR(major) 8.383 min].

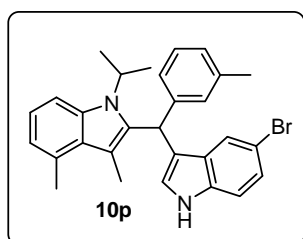

**(10p):** yield: 93%; ee: 90%; (purified by flash column chromatography with petroleum ether and DCM eluents, v/v = 2.5/1); <sup>1</sup>H-NMR (d<sub>6</sub>-DMSO, 400 MHz) δ (ppm) 1.17 (m, 6H), 2.24 (s, 3H), 2.30 (s, 3H), 2.63 (s, 3H), 4.70 (m,

1H), 6.14 (s, 1H), 6.67 (d,  $J = 7.2$  Hz, 1H), 6.95 (m, 5H), 7.18 (m, 2H), 7.29 (m, 2H), 7.37 (d,  $J = 8.4$  Hz, 1H), 11.20 (s, 1H);  $^{13}\text{C}$  NMR (151 MHz,  $\text{d}_6$ -Acetone)  $\delta$  141.35, 137.17, 135.86, 135.39, 134.40, 130.04, 128.99, 128.78, 127.64, 126.54, 125.52, 125.42, 123.83, 121.36, 119.88, 119.81, 115.14, 112.98, 111.33, 109.56, 107.76, 46.88, 38.58, 20.25, 19.97, 19.50, 11.35. HRMS calcd. for  $\text{C}_{29}\text{H}_{29}\text{BrN}_2$  ( $\text{M}^+$ ): 484.1514, found: 484.1531; The enantiomeric excess of 90% ee was determined by HPLC [Daicel Chirapak AD-H, hexane/isopropanol = 95/5, flow rate 1 mL/min,  $T = 30$  °C, 254 nm,  $t_R(\text{minor})$  6.918 min,  $t_R(\text{major})$  9.108 min].

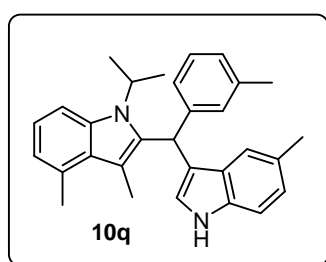

**(10q)**: yield: 90%; ee: 87%; (purified by flash column chromatography with petroleum ether and DCM eluents,  $v/v = 2.5/1$ );  $^1\text{H}$ -NMR ( $\text{d}_6$ -Acetone, 400 MHz)  $\delta$  (ppm) 1.15 (s, 3H), 1.33 (d, 3H), 2.25 (s, 3H), 2.30 (s, 3H), 2.39 (s, 3H), 2.68 (s, 3H), 4.85 (m, 1H), 6.18 (s, 1H), 6.70 (d,  $J = 8.4$  Hz, 1H), 6.89 (m, 2H), 6.96 (d, 1H), 7.06 (m, 3H), 7.16 (m, 2H), 7.33 (m, 2H), 10.01 (s, 1H);  $^{13}\text{C}$  NMR (101 MHz,  $\text{d}_6$ -Acetone)  $\delta$  142.14, 137.24, 136.74, 135.35, 130.21, 129.28, 127.77, 127.54, 127.37, 126.59, 125.76, 124.21, 123.05, 119.97, 118.75, 114.86, 111.04, 109.75, 47.12, 39.00, 20.67, 20.50, 20.22, 19.75, 11.62. HRMS calcd. for  $\text{C}_{30}\text{H}_{32}\text{N}_2$  ( $\text{M}^+$ ): 420.2565, found: 420.2544; The enantiomeric excess of 87% ee was determined by HPLC [Daicel Chirapak AD-H, hexane/isopropanol = 95/5, flow rate 0.5 mL/min,  $T = 30$  °C, 254 nm,  $t_R(\text{minor})$  12.115 min,  $t_R(\text{major})$  15.994 min].

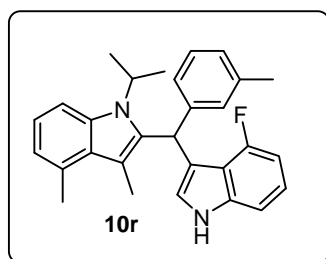

**(10r)**: yield: 92%; ee: 83%; (purified by flash column chromatography with petroleum ether and DCM eluents,  $v/v = 2.5/1$ );  $^1\text{H}$ -NMR ( $\text{d}_6$ -Acetone, 400 MHz)  $\delta$  (ppm) 1.20 (m, 6H), 2.15 (s, 3H), 2.22 (s, 3H), 2.59 (s, 3H), 4.72 (m, 1H), 6.21 (s, 1H), 6.65 (m, 3H), 6.88 (m, 2H), 7.03 (m, 3H), 7.19 (m, 2H), 7.31 (d,  $J = 8.4$  Hz, 1H), 11.24 (s, 1H);  $^{13}\text{C}$  NMR (151 MHz,  $\text{d}_6$ -Acetone)  $\delta$  157.51, 155.88, 142.72, 139.62, 139.55, 137.00, 129.92, 128.68, 127.73, 126.30, 125.11, 124.53, 121.80, 121.75, 119.74, 115.70, 115.57, 114.17, 109.57, 107.52, 103.66, 103.53, 46.68, 39.87, 20.23, 19.99, 19.37, 11.19. HRMS calcd. for  $\text{C}_{29}\text{H}_{29}\text{FN}_2$  ( $\text{M}^+$ ): 424.2315, found: 424.2321; The enantiomeric excess of 83% ee was determined by HPLC [Daicel Chirapak AD-H,



hexane/isopropanol = 98/2, flow rate 1.0 mL/min, T = 30 °C, 254 nm, tR(minor) 8.798min, tR(major) 12.316 min].

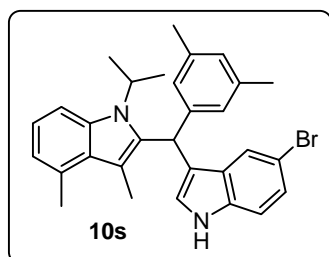

**(10s):** yield: 96%; ee: 95%; (purified by flash column chromatography with petroleum ether and DCM eluents, v/v = 2.5/1); <sup>1</sup>H-NMR (CDCl<sub>3</sub>, 400 MHz) δ (ppm) 1.12 (s, 3H), 1.32 (d, 3H), 2.21 (s, 6H), 2.37 (s, 3H), 2.74 (s, 3H), 4.66 (m, 1H), 6.00 (s, 1H), 6.75 (s, 1H), 6.80 (m, 3H), 6.84 (s, 1H), 6.98 (t, 1H), 7.22 (m, 1H), 7.27 (m, 1H), 7.32 (d, *J* = 8.4 Hz, 1H), 7.47 (s, 1H), 7.98 (s, 1H); <sup>13</sup>C NMR (101 MHz, d<sub>6</sub>-Acetone) δ 141.49, 137.25, 136.12, 135.61, 134.67, 130.28, 129.09, 127.91, 127.63, 126.39, 125.74, 124.05, 121.59, 120.09, 120.05, 115.58, 113.20, 111.55, 109.80, 107.94, 47.13, 38.78, 20.41, 20.22, 19.84, 11.62. HRMS calcd. for C<sub>30</sub>H<sub>31</sub>BrN<sub>2</sub> (M<sup>+</sup>): 498.1671, found: 498.1656; The enantiomeric excess of 95% ee was determined by HPLC [Daicel Chirapak OD-H, hexane/isopropanol = 95/5, flow rate 1.0 mL/min, T = 30 °C, 254 nm, tR(minor) 10.962 min, tR(major) 13.471 min].

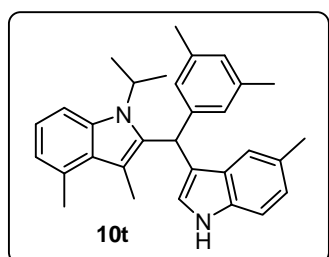

**(10t):** yield: 87%; ee: 93%; (purified by flash column chromatography with petroleum ether and DCM eluents, v/v = 2.5/1); <sup>1</sup>H-NMR (CDCl<sub>3</sub>, 400 MHz) δ (ppm) 1.12 (s, 3H), 1.31 (d, 3H), 2.21 (s, 6H), 2.37 (d, 6H), 2.74 (s, 3H), 4.70 (m, 1H), 6.04 (s, 1H), 6.71 (s, 1H), 6.78 (d, *J* = 6.8 Hz, 1H), 6.85 (m, 3H), 6.99 (m, 2H), 7.13 (s, 1H), 7.24 (d, *J* = 8.4 Hz, 1H), 7.32 (d, *J* = 8.0 Hz, 1H), 7.86 (s, 1H); <sup>13</sup>C NMR (101 MHz, d<sub>6</sub>-Acetone) δ 142.00, 137.07, 136.71, 135.31, 134.71, 130.19, 127.96, 127.59, 127.43, 127.18, 127.04, 126.44, 124.17, 123.02, 119.93, 118.72, 115.04, 111.00, 109.76, 47.12, 38.92, 20.66, 20.40, 20.21, 19.73, 11.63. HRMS calcd. for C<sub>31</sub>H<sub>34</sub>N<sub>2</sub> (M<sup>+</sup>): 434.2722, found: 434.2708; The enantiomeric excess of 93% ee was determined by HPLC [Daicel Chirapak AD-H, hexane/isopropanol = 97/3, flow rate 1.0 mL/min, T = 30 °C, 254 nm, tR(minor) 12.911 min, tR(major) 16.557 min].

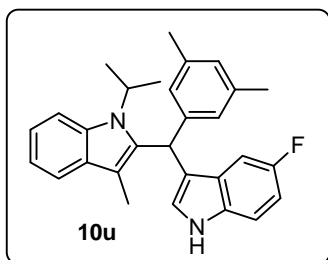

**(10u):** yield: 95%; ee: 91%; (purified by flash column chromatography with petroleum ether and DCM eluents, v/v = 2.5/1);  $^1\text{H-NMR}$  ( $d_6$ -DMSO, 400 MHz)  $\delta$  (ppm) 1.22 (m, 6H), 1.90 (s, 3H), 2.20 (s, 6H), 4.73 (m, 1H), 6.03 (s, 1H), 6.75 (m, 1H), 6.93 (m, 7H), 7.40 (m, 3H), 11.06 (s, 1H);  $^{13}\text{C NMR}$  (151 MHz,  $d_6$ -Acetone)  $\delta$  157.64, 156.10, 141.20, 137.05, 135.80, 133.30, 129.57, 127.47, 127.30, 127.23, 126.21, 125.89, 119.95, 117.88, 117.56, 116.09, 112.00, 111.94, 111.29, 109.27, 109.09, 103.36, 103.20, 46.73, 39.51, 20.13, 19.96, 8.00. HRMS calcd. for  $\text{C}_{29}\text{H}_{29}\text{FN}_2$  ( $\text{M}^+$ ): 424.2315, found: 424.2303; The enantiomeric excess of 91% ee was determined by HPLC [Daicel Chirapak AD-H, hexane/isopropanol = 95/5, flow rate 1.0 mL/min, T = 30 °C, 254 nm,  $t\text{R}(\text{minor})$  6.745 min,  $t\text{R}(\text{major})$  10.297 min].

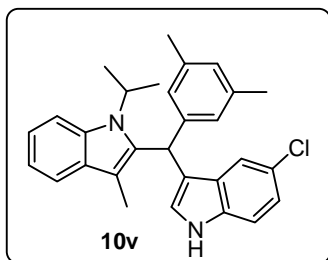

**(10v):** yield: 91%; ee: 92%; (purified by flash column chromatography with petroleum ether and DCM eluents, v/v = 2.5/1);  $^1\text{H-NMR}$  ( $\text{CDCl}_3$ , 400 MHz)  $\delta$  (ppm) 1.35 (m, 6H), 2.00 (s, 3H), 2.26 (d, 6H), 4.70 (m, 1H), 5.98 (s, 1H), 6.72 (s, 1H), 6.86 (s, 2H), 6.90 (s, 1H), 7.15 (m, 3H), 7.28 (d,  $J = 8.4$  Hz, 1H), 7.31 (s, 1H), 7.53 (d,  $J = 7.6$  Hz, 1H), 7.59 (d,  $J = 7.6$  Hz, 1H), 7.98 (s, 1H);  $^{13}\text{C NMR}$  (101 MHz,  $d_6$ -Acetone)  $\delta$  141.48, 137.33, 136.03, 135.41, 134.22, 129.85, 128.35, 127.77, 126.48, 125.98, 123.92, 121.48, 120.25, 118.26, 118.16, 117.85, 116.08, 112.76, 111.54, 106.95, 46.97, 39.66, 20.41, 20.28, 8.29. HRMS calcd. for  $\text{C}_{29}\text{H}_{29}\text{ClN}_2$  ( $\text{M}^+$ ): 440.2019, found: 440.2008; The enantiomeric excess of 92% ee was determined by HPLC [Daicel Chirapak AD-H, hexane/isopropanol = 95/5, flow rate 1.0 mL/min, T = 30 °C, 254 nm,  $t\text{R}(\text{minor})$  5.882 min,  $t\text{R}(\text{major})$  9.031 min].

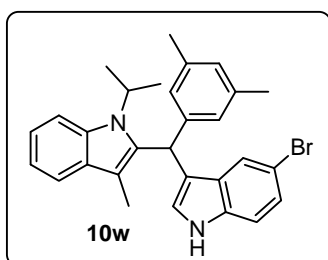

**(10w):** yield: 93%; ee: 92%; (purified by flash column chromatography with petroleum ether and DCM eluents, v/v = 2.5/1);  $^1\text{H-NMR}$  ( $d_6$ -DMSO, 400 MHz)  $\delta$  (ppm) 1.23 (m, 6H), 1.88 (s, 3H), 2.20 (s, 6H), 4.73 (m, 1H), 6.06 (s, 1H), 6.81 (m, 3H), 6.89 (s, 1H), 6.99 (m, 2H), 7.18 (m, 1H), 7.27 (s, 1H), 7.36 (d, 1H), 7.43 (d, 1H), 7.47 (d,  $J = 8.1$  Hz, 1H), 11.17 (s, 1H);  $^{13}\text{C NMR}$  (151 MHz,  $d_6$ -Acetone)  $\delta$  141.22,

137.06, 135.77, 135.39, 133.93, 129.58, 128.76, 127.50, 126.21, 125.58, 123.79, 121.11, 119.98, 117.89, 117.58, 115.71, 112.95, 111.28, 106.84, 46.70, 39.35, 20.14, 20.01, 8.02. HRMS calcd. for  $C_{29}H_{29}BrN_2$  ( $M^+$ ): 484.1514, found: 484.1508; The enantiomeric excess of 92% ee was determined by HPLC [Daicel Chirapak AD-H, hexane/isopropanol = 95/5, flow rate 1.0 mL/min, T = 30 °C, 254 nm, tR(minor) 5.945 min, tR(major) 9.933 min].

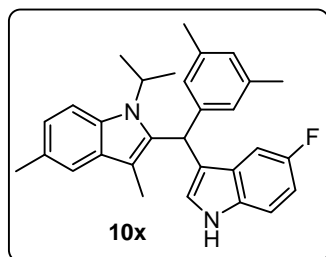

**(10x)**: yield: 94%; ee: 89%; (purified by flash column chromatography with petroleum ether and DCM eluents, v/v = 2.5/1);  $^1H$ -NMR ( $d_6$ -DMSO, 400 MHz)  $\delta$  (ppm) 1.25 (m, 6H), 1.86 (s, 3H), 2.20 (s, 6H), 2.35 (s, 3H), 4.68 (m, 1H), 5.99 (s, 1H), 6.73 (m, 1H), 6.87 (m, 6H), 7.21 (s, 1H), 7.37 (m, 2H), 11.04 (s, 1H);  $^{13}C$  NMR (151 MHz,  $d_6$ -Acetone)  $\delta$  157.63, 156.09, 141.26, 137.02, 135.82, 133.29, 129.83, 127.44, 127.33, 127.26, 126.27, 126.20, 125.83, 121.50, 117.70, 116.21, 111.98, 111.91, 111.03, 109.25, 109.08, 103.38, 103.22, 46.64, 39.50, 20.15, 20.01, 8.03. HRMS calcd. for  $C_{30}H_{31}FN_2$  ( $M^+$ ): 438.2471, found: 438.2466; The enantiomeric excess of 89% ee was determined by HPLC [Daicel Chirapak AD-H, hexane/isopropanol = 95/5, flow rate 0.5 mL/min, T = 30 °C, 254 nm, tR(minor) 11.807 min, tR(major) 19.702 min].

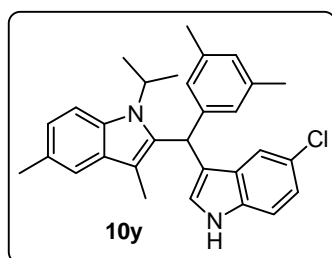

**(10y)**: yield: 94%; ee: 92%; (purified by flash column chromatography with petroleum ether and DCM eluents, v/v = 2.5/1);  $^1H$ -NMR ( $d_6$ -DMSO, 400 MHz)  $\delta$  (ppm) 1.20 (m, 6H), 1.84 (s, 3H), 2.19 (s, 6H), 2.35 (s, 3H), 4.68 (m, 1H), 6.02 (s, 1H), 6.84 (m, 5H), 7.06 (m, 2H), 7.20 (s, 1H), 7.38 (t, 2H), 11.14 (s, 1H);  $^{13}C$  NMR (101 MHz,  $d_6$ -Acetone)  $\delta$  141.54, 137.29, 136.03, 135.40, 132.58, 130.10, 128.36, 127.73, 127.05, 126.45, 125.91, 123.89, 121.78, 121.44, 118.26, 117.96, 116.20, 112.72, 111.27, 106.60, 46.87, 39.64, 20.40, 20.32, 8.29. HRMS calcd. for  $C_{30}H_{31}ClN_2$  ( $M^+$ ): 454.2176, found: 454.2164; The enantiomeric excess of 92% ee was determined by HPLC [Daicel Chirapak OD-H, hexane/isopropanol = 95/5, flow rate 0.5 mL/min, T = 30 °C, 254 nm, tR(minor) 11.627 min, tR(major) 19.563 min].

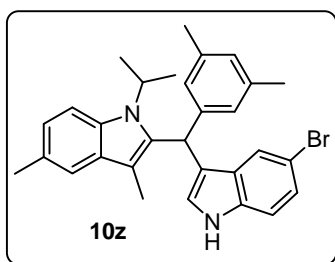

**(10z):** yield: 97%; ee: 92%; (purified by flash column chromatography with petroleum ether and DCM eluents, v/v = 2.5/1);  $^1\text{H-NMR}$  ( $d_6$ -DMSO, 400 MHz)  $\delta$  (ppm) 1.20 (m, 6H), 1.84 (s, 3H), 2.19 (s, 6H), 2.35 (s, 3H), 4.68 (m, 1H), 6.02 (s, 1H), 6.82 (m, 5H), 7.18 (m, 2H), 7.25 (s, 1H), 7.36 (t, 2H), 11.15 (s, 1H);  $^{13}\text{C}$  NMR (151 MHz,  $d_6$ -Acetone)  $\delta$  141.28, 137.02, 135.77, 135.38, 132.31, 129.84, 128.79, 127.47, 126.27, 126.19, 125.52, 123.77, 121.52, 121.12, 117.71, 115.83, 112.93, 111.26, 111.01, 106.32, 46.61, 39.34, 20.15, 20.07, 8.04. HRMS calcd. for  $\text{C}_{30}\text{H}_{31}\text{BrN}_2$  ( $\text{M}^+$ ): 498.1671, found: 498.1652; The enantiomeric excess of 92% ee was determined by HPLC [Daicel Chirapak AD-H, hexane/isopropanol = 95/5, flow rate 0.5 mL/min, T = 30 °C, 254 nm, tR(minor) 11.418 min, tR(major) 20.633 min].

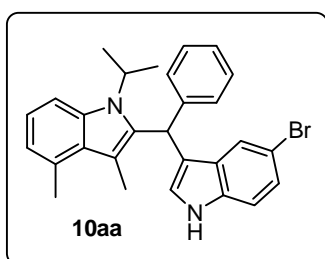

**(10aa):** yield: 94%; ee: 86%; (purified by flash column chromatography with petroleum ether and DCM eluents, v/v = 2.5/1);  $^1\text{H-NMR}$  ( $d_6$ -DMSO, 400 MHz)  $\delta$  (ppm) 1.19 (m, 6H), 2.28 (s, 3H), 2.62 (s, 3H), 4.71 (m, 1H), 6.19 (s, 1H), 6.67 (d,  $J = 7.2$  Hz, 1H), 6.88 (t, 2H), 7.20 (m, 4H), 7.30 (m, 4H), 7.38 (d,  $J = 8.7$  Hz, 1H), 11.21 (s, 1H);  $^{13}\text{C}$  NMR (151 MHz,  $d_6$ -Acetone)  $\delta$  141.49, 135.86, 135.42, 134.41, 130.05, 128.75, 128.34, 127.77, 127.64, 125.81, 125.56, 123.87, 121.37, 119.93, 119.83, 114.95, 113.01, 111.36, 109.58, 107.85, 46.89, 38.64, 19.97, 19.50, 11.32. HRMS calcd. for  $\text{C}_{28}\text{H}_{27}\text{BrN}_2$  ( $\text{M}^+$ ): 470.1358, found: 470.1340; The enantiomeric excess of 86% ee was determined by HPLC [Daicel Chirapak AD-H, hexane/isopropanol = 95/5, flow rate 1.0 mL/min, T = 30 °C, 254 nm, tR(minor) 8.715 min, tR(major) 12.133 min].

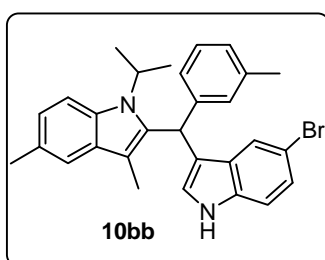

**(10bb):** yield: 92%; ee: 87%; (purified by flash column chromatography with petroleum ether and DCM eluents, v/v = 2.5/1);  $^1\text{H-NMR}$  ( $d_6$ -DMSO, 400 MHz)  $\delta$  (ppm) 1.21 (m, 6H), 1.83 (s, 3H), 2.24 (s, 3H), 2.35 (s, 3H), 4.69 (m, 1H), 6.07 (s, 1H), 6.76 (s, 1H), 6.85 (d,  $J = 8.1$  Hz, 1H), 6.94 (d,  $J = 8.1$  Hz, 1H), 7.04 (m, 2H), 7.19 (m, 3H), 7.26 (s, 1H), 7.37 (d,  $J = 8.7$  Hz, 2H), 11.16 (s, 1H);  $^{13}\text{C}$  NMR (101 MHz,

d<sub>6</sub>-Acetone)  $\delta$  142.10, 137.92, 136.47, 136.13, 133.04, 130.55, 129.78, 129.46, 128.39, 127.36, 127.02, 126.23, 124.53, 122.29, 121.87, 118.42, 116.41, 113.67, 112.02, 111.72, 107.15, 47.32, 40.12, 20.96, 20.89, 20.84, 8.75. HRMS calcd. for C<sub>29</sub>H<sub>29</sub>BrN<sub>2</sub> (M<sup>+</sup>): 484.1514, found: 484.1501; The enantiomeric excess of 87% ee was determined by HPLC [Daicel Chirapak AD-H, hexane/isopropanol = 95/5, flow rate 1.0 mL/min, T = 30 °C, 254 nm, tR(minor) 7.396 min, tR(major) 12.071 min].

#### References:

- (1) D. Uraguchi, M. Terada, *J. Am. Chem. Soc.* 2004, **126**, 5356.
- (2) T. Akiyama, H. Morita, J. Itoh, K. Fuchibe, *Org. Lett.* 2005, **7**, 2583.
- (3) R. I. Storer, D. E. Carrera, Y. Ni, D. W. C. MacMillan, *J. Am. Chem. Soc.* 2006, **128**, 84.
- (4) Q.-X. Guo, H. Liu, C. Guo, S.-W. Luo, Y. Gu, L.-Z. Gong, *J. Am. Chem. Soc.* 2007, **129**, 3790.
- (5) X.-H. Chen, W.-Q. Zhang, L.-Z. Gong, *J. Am. Chem. Soc.* 2008, **130**, 5652.
- (6) G. Pousse, A. Devineau, J. Blanchet, *Tetrahedron*. 2009, **65**, 10617.
- (7) D. Fabbri, G. Delogu, O.-D. Lucchi, *Tetrahedron: Asymmetry*. 1993, **4**, 1591.
- (8) D. Nakashima, H. Yamamoto, *J. Am. Chem. Soc.* 2006, **128**, 9626.
- (9) A. Berkessel, M. Frauenkron, *Tetrahedron: Asymmetry*. 1996, **7**, 671.
- (10) M. Rueping, B.-J. Nachtsheim, W. Ieawsuwan, *Chem. Eur. J.* 2010, **16**, 13116.
- (11) M. Rueping, U. Uria, M.-Y. Lin, I. Atodiresei, *J. Am. Chem. Soc.* 2011, **133**, 3732.
- (12) K. Wu, Y.-J. Jiang, S.-Q. Zhang, *Chem. Eur. J.* 2013, **19**, 474.
- (13) Q. Cai, C. Zheng, S.-L. You, *Angew. Chem. Int. Ed.* 2010, **49**, 8666.
- (14) J. F. Quinn, M. E. Bos, W. D. Wulff, *Org. Lett.* 1999, **1**, 161.

### 3 Copies of $^1\text{H}$ - and $^{13}\text{C}$ -NMR spectra of products

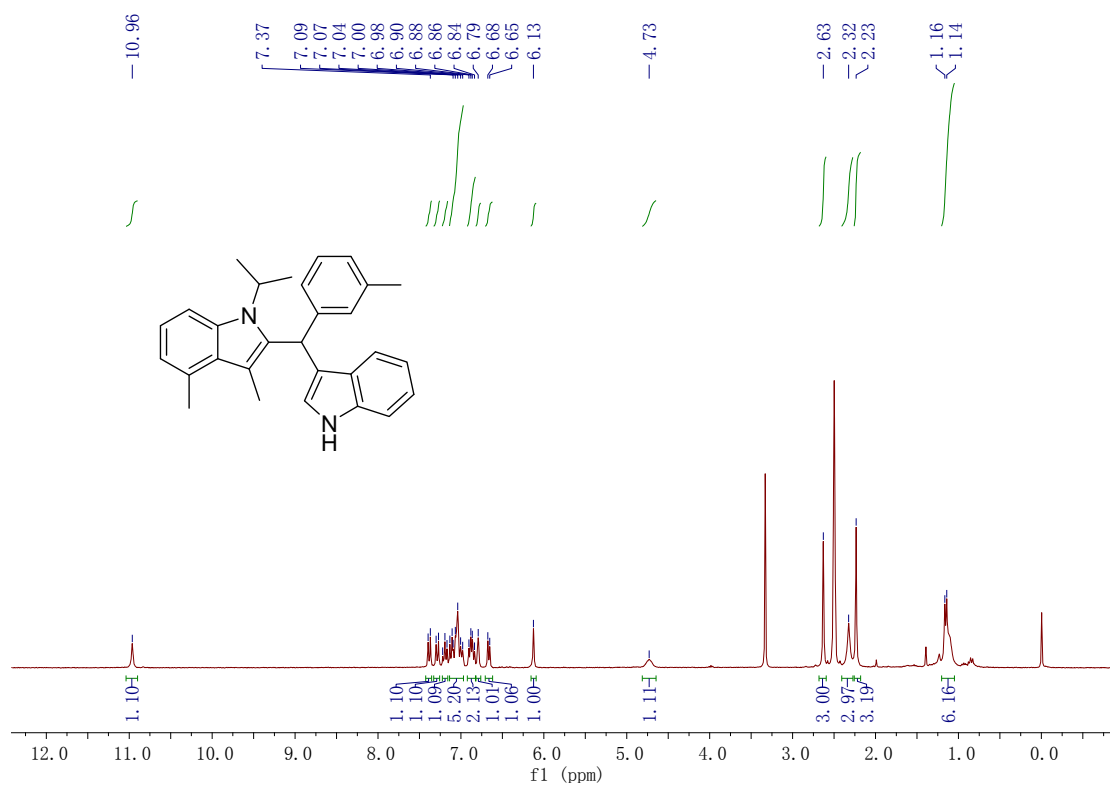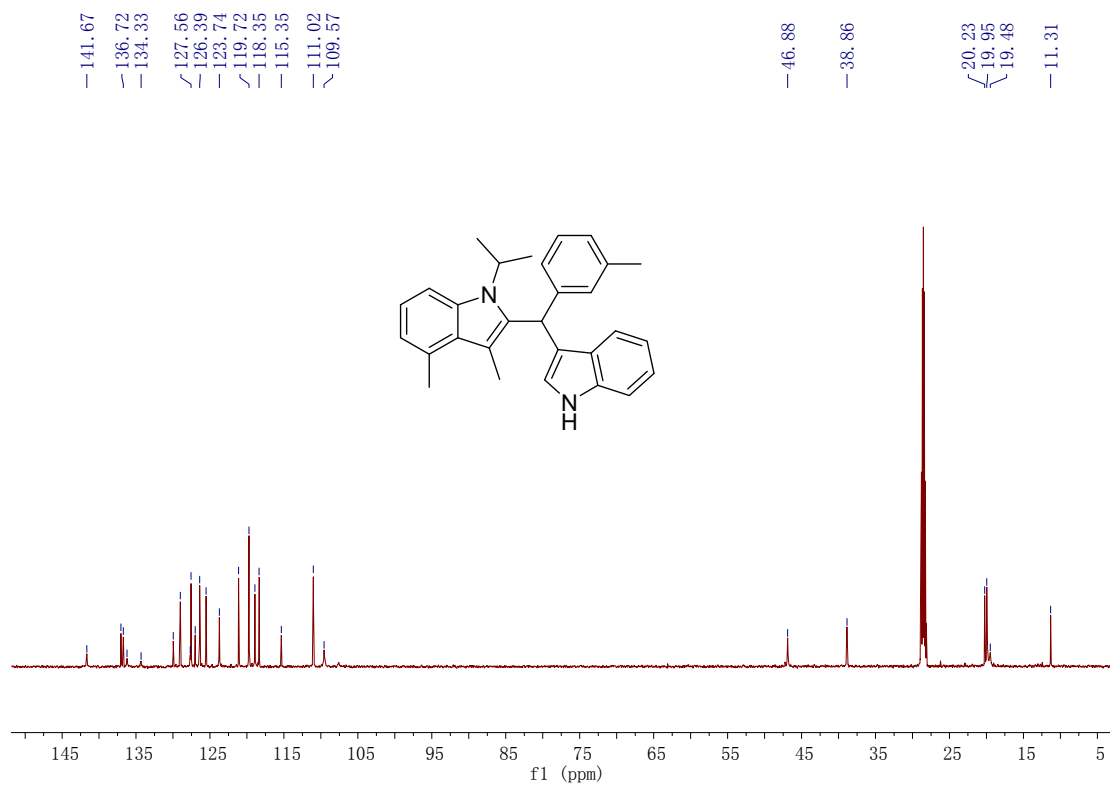

Figure S1.  $^1\text{H}$ - (upper) and  $^{13}\text{C}$ -NMR (bottom) of **10a**

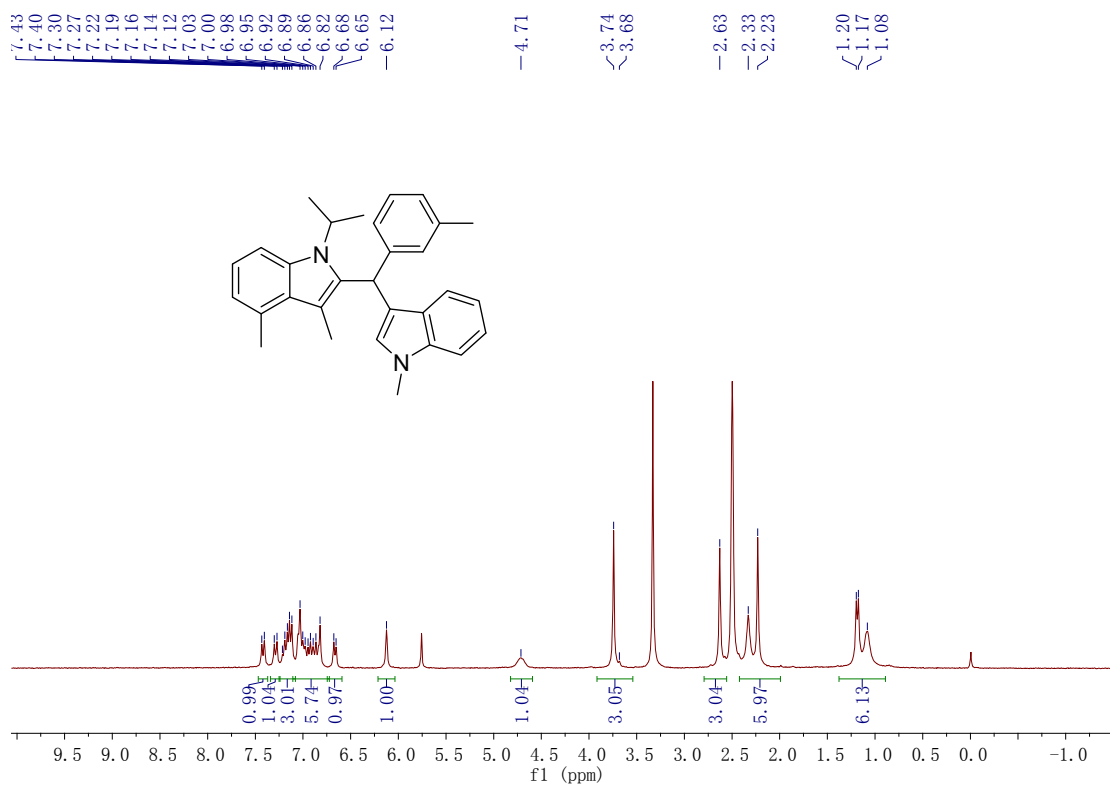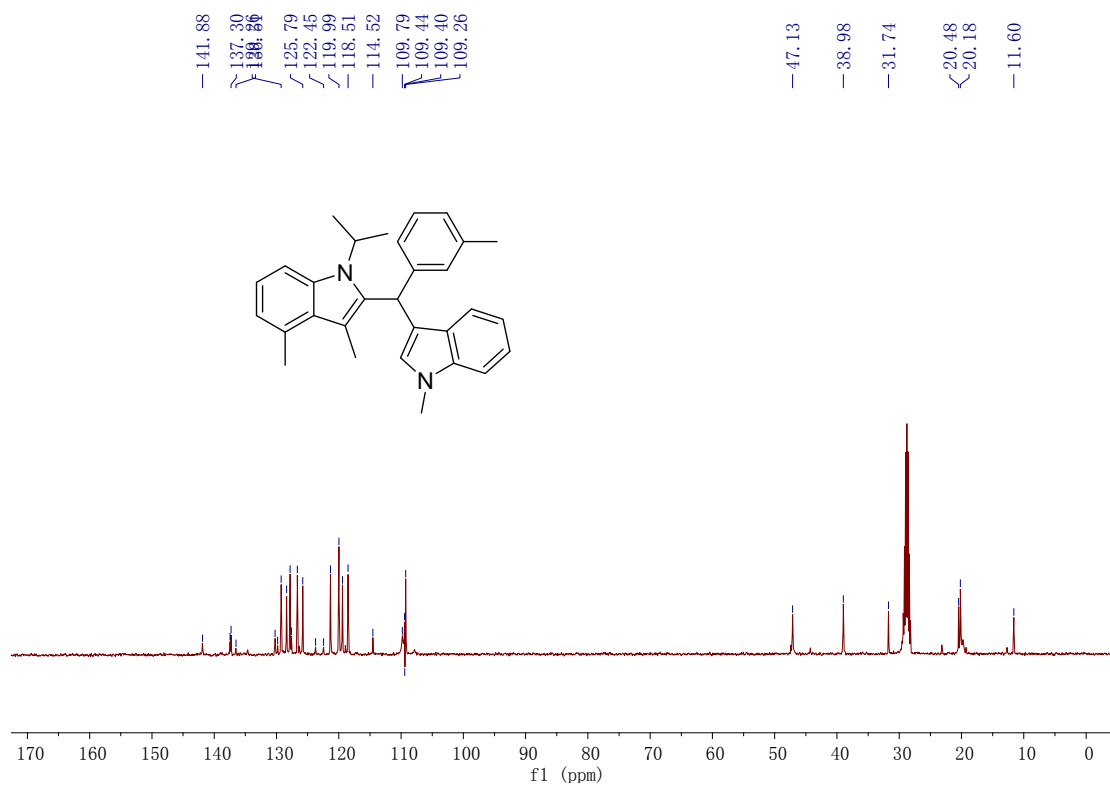

**Figure S2.** <sup>1</sup>H- (upper) and <sup>13</sup>C-NMR (bottom) of **10b**

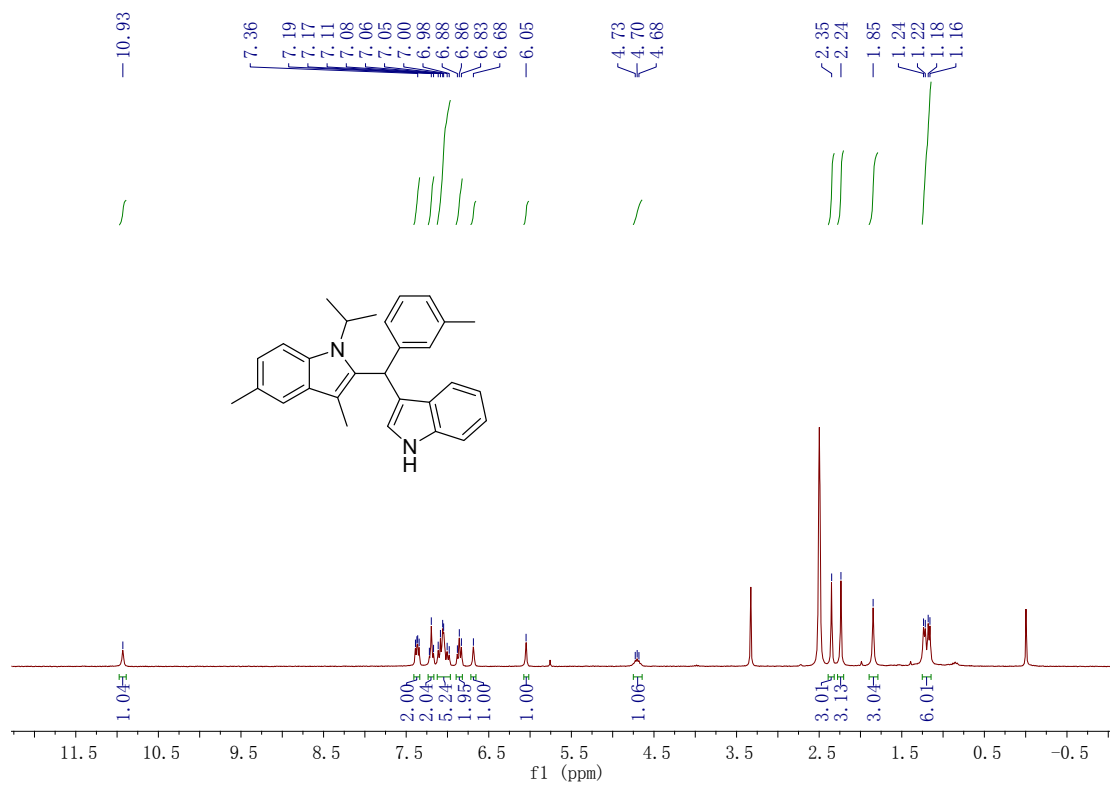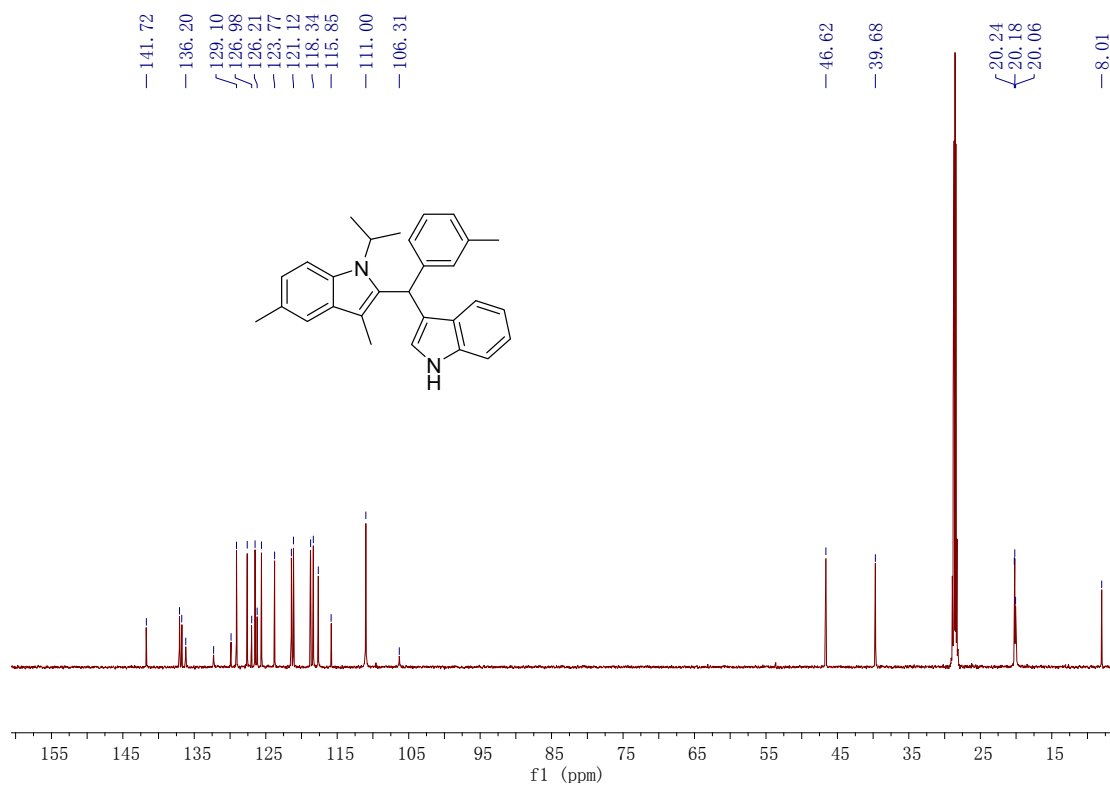

**Figure S3.** <sup>1</sup>H- (upper) and <sup>13</sup>C-NMR (bottom) of **10c**



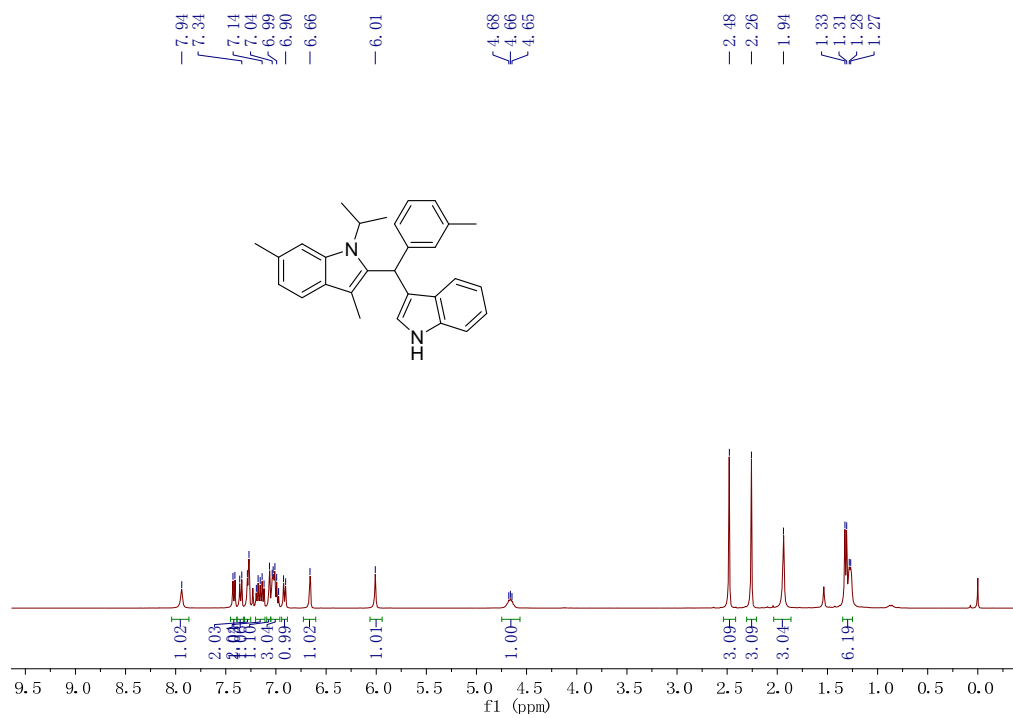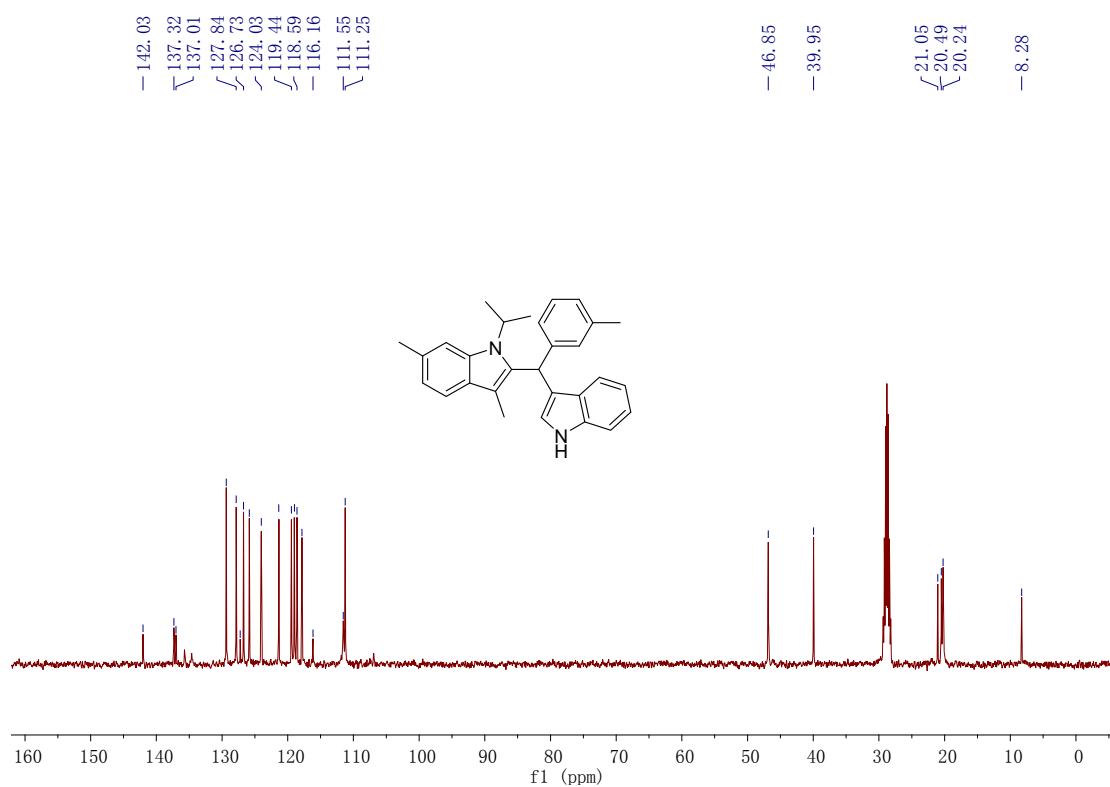

**Figure S4.** <sup>1</sup>H- (upper) and <sup>13</sup>C-NMR (bottom) of **10d**

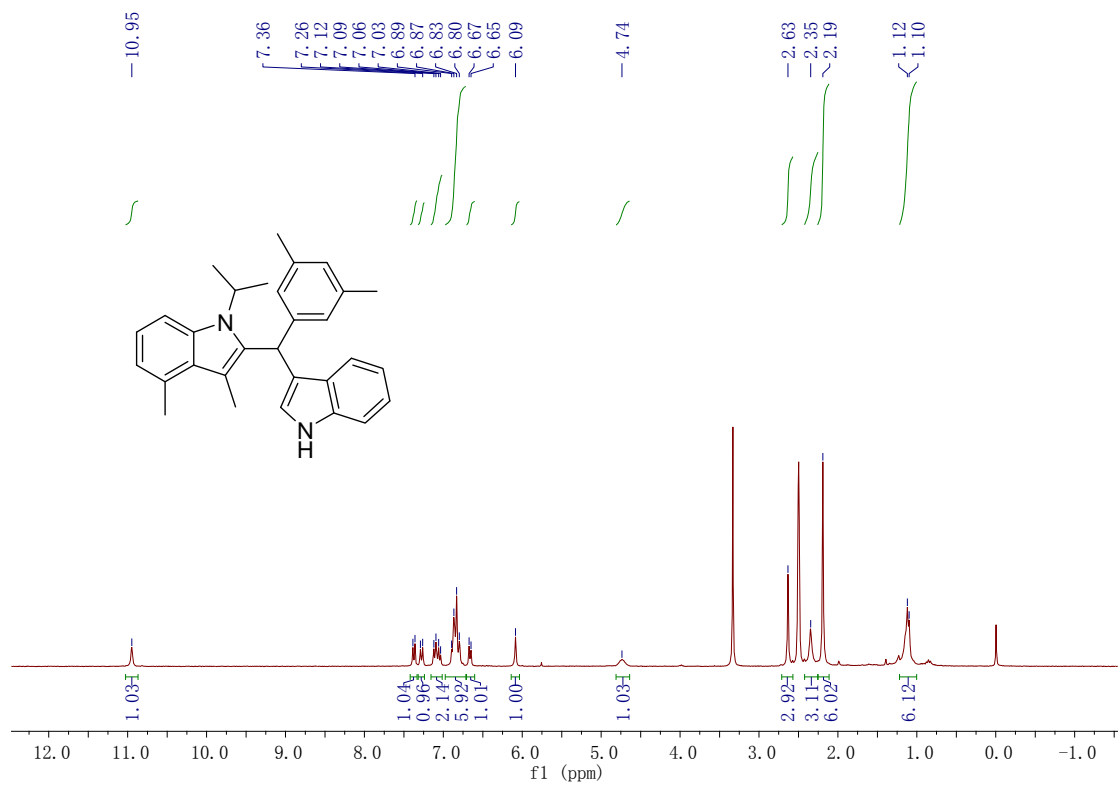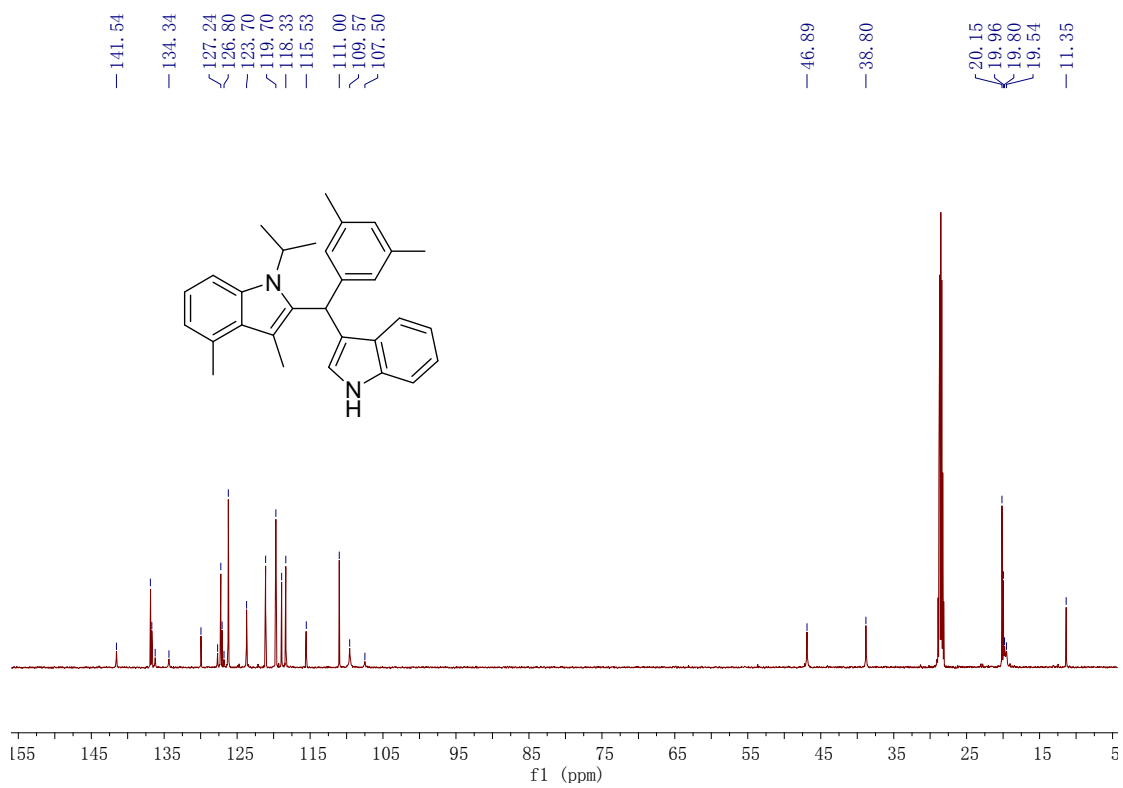

Figure S5. <sup>1</sup>H- (upper) and <sup>13</sup>C-NMR (bottom) of 10e

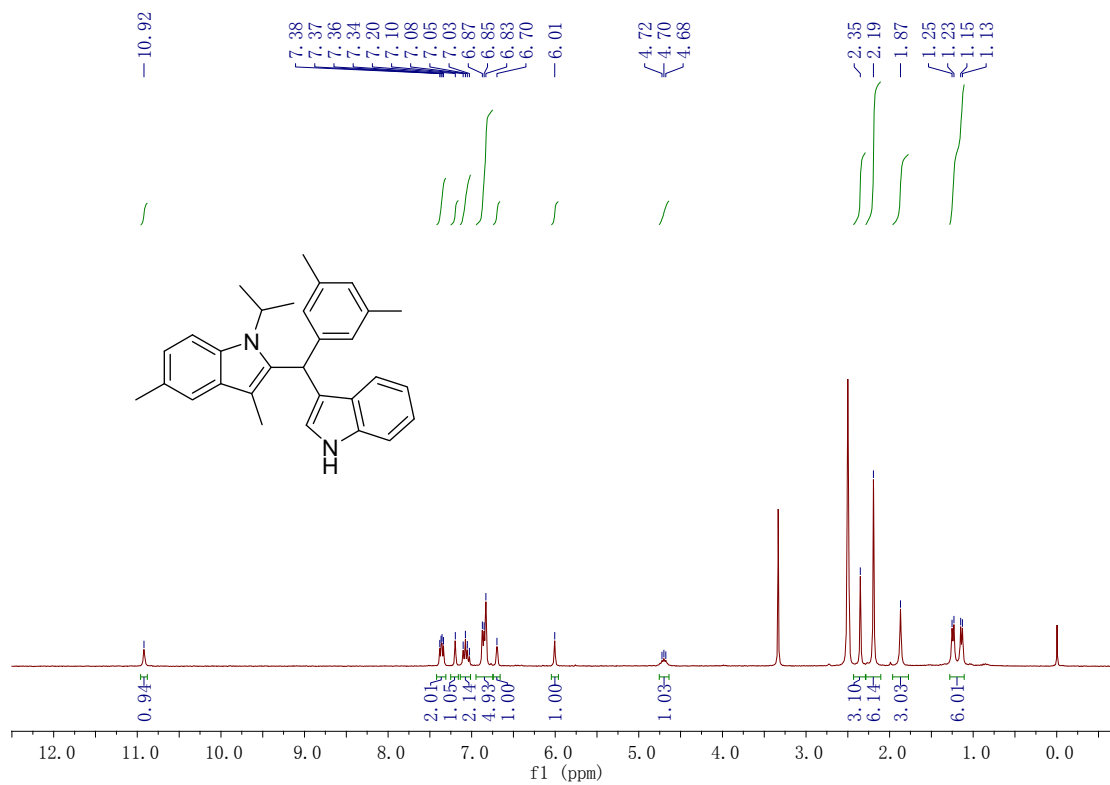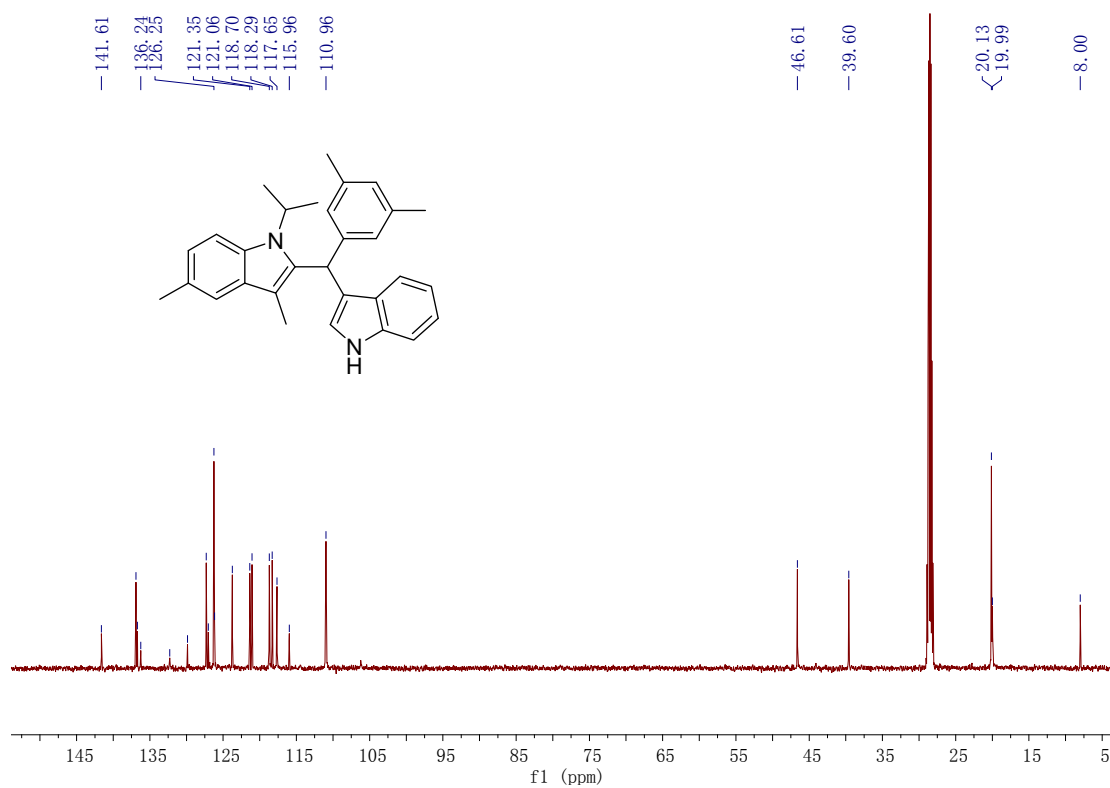

**Figure S6.** <sup>1</sup>H- (upper) and <sup>13</sup>C-NMR (bottom) of **10f**

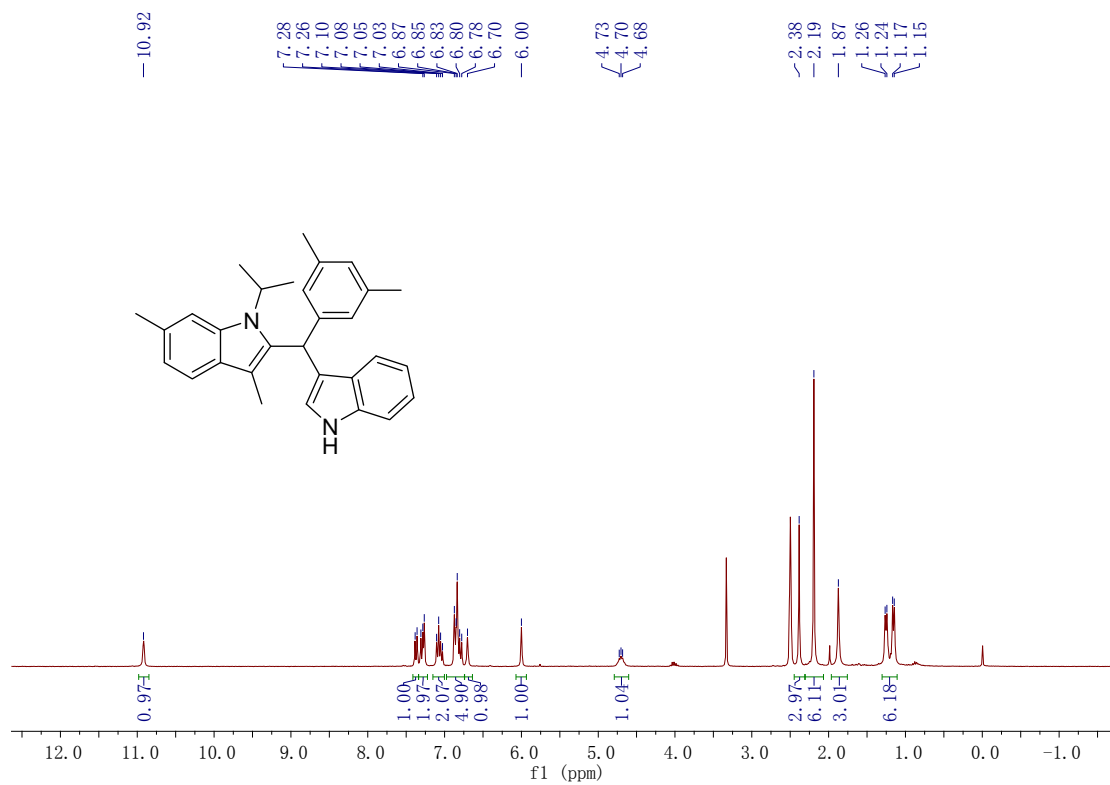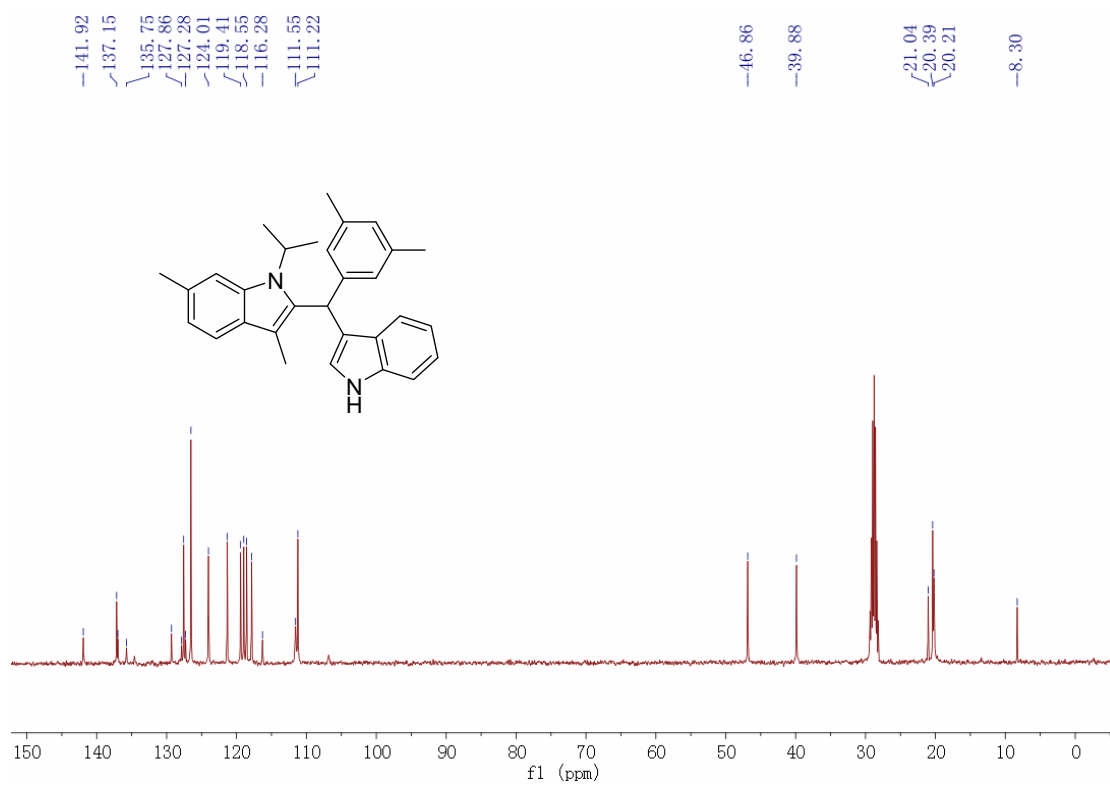

Figure S7. <sup>1</sup>H- (upper) and <sup>13</sup>C-NMR (bottom) of 10g

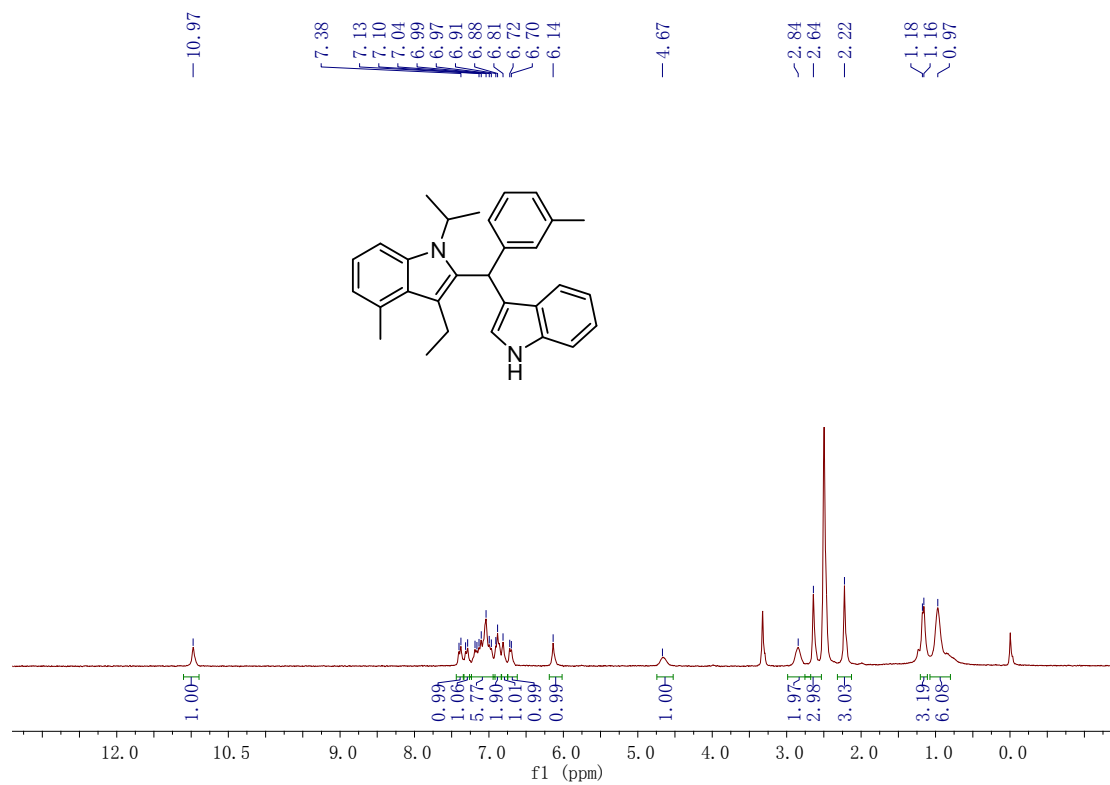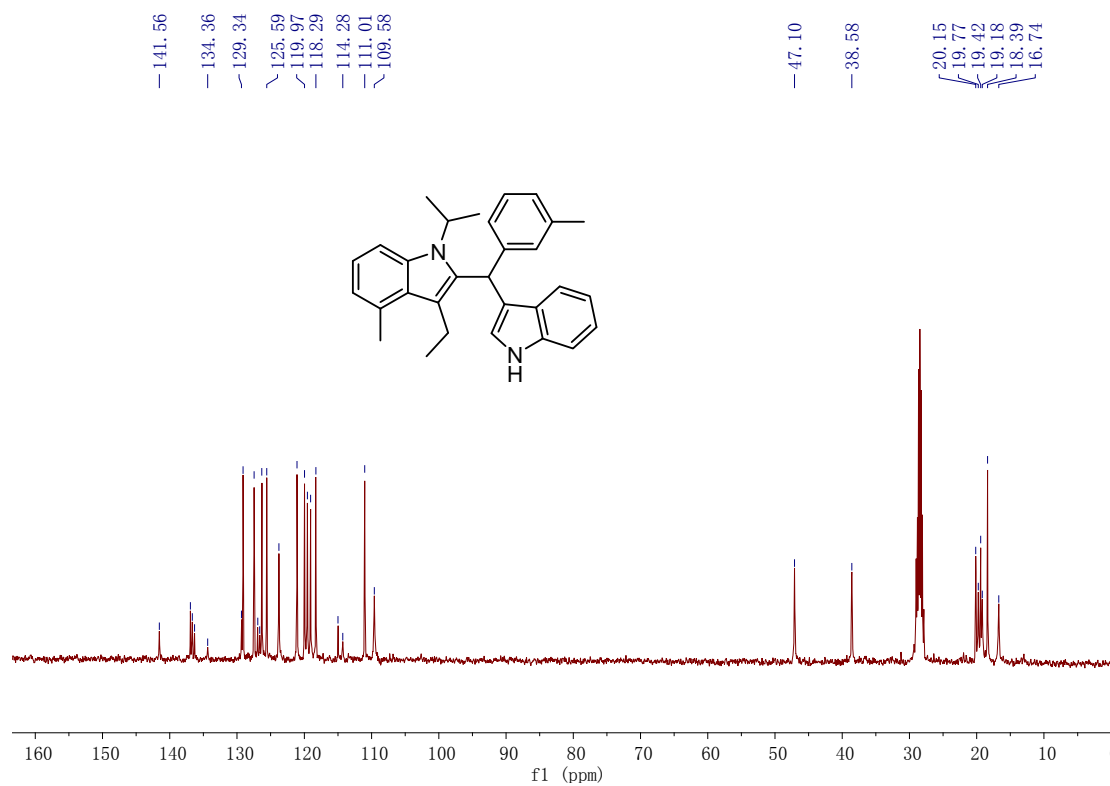

**Figure S8.** <sup>1</sup>H- (upper) and <sup>13</sup>C-NMR (bottom) of 10h

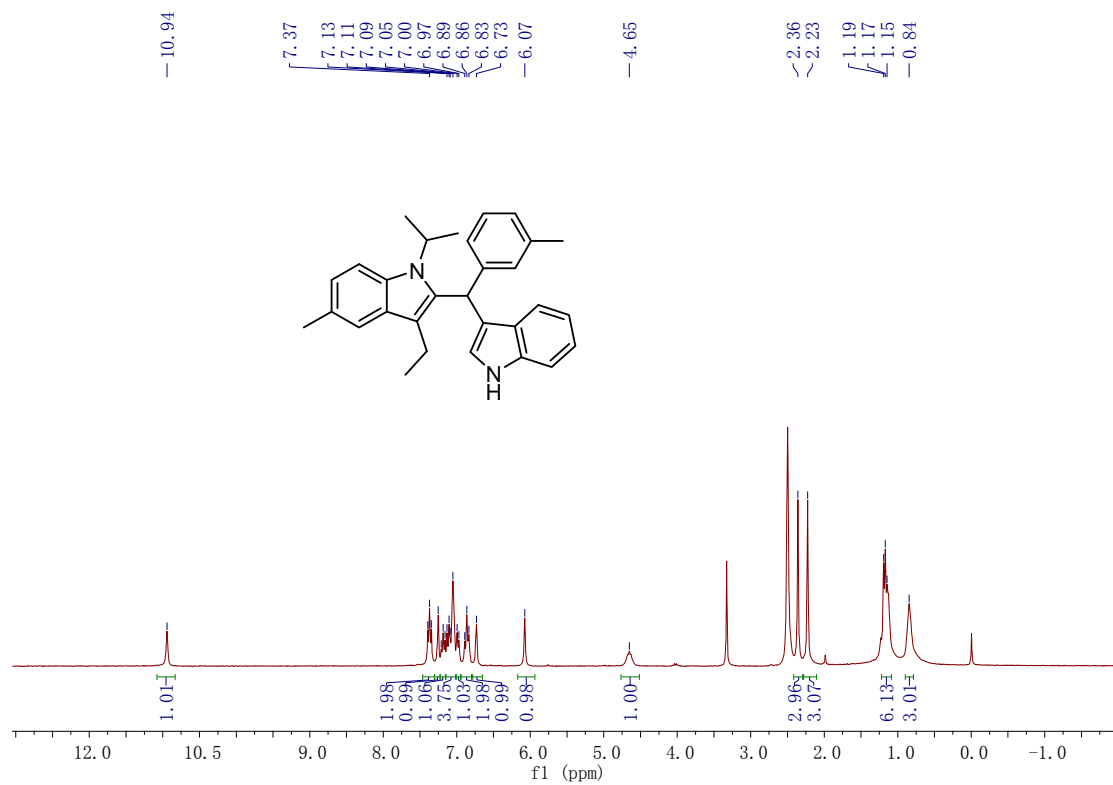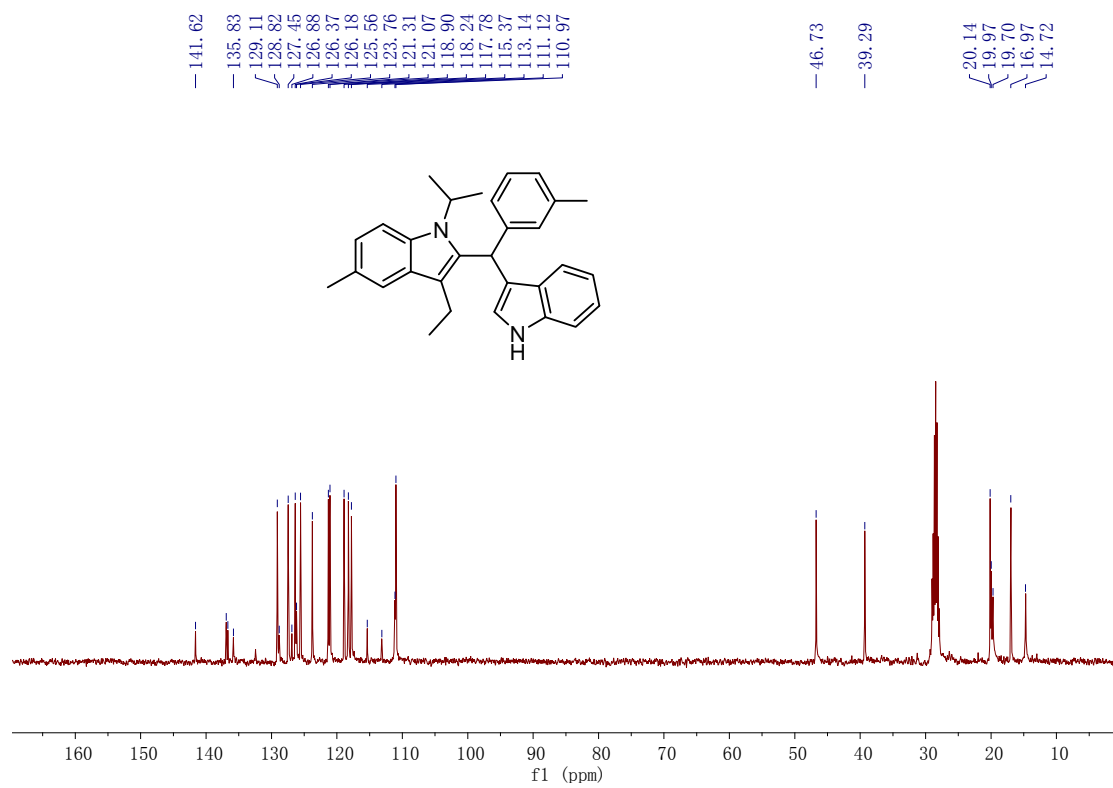

**Figure S9.** <sup>1</sup>H- (upper) and <sup>13</sup>C-NMR (bottom) of **10i**

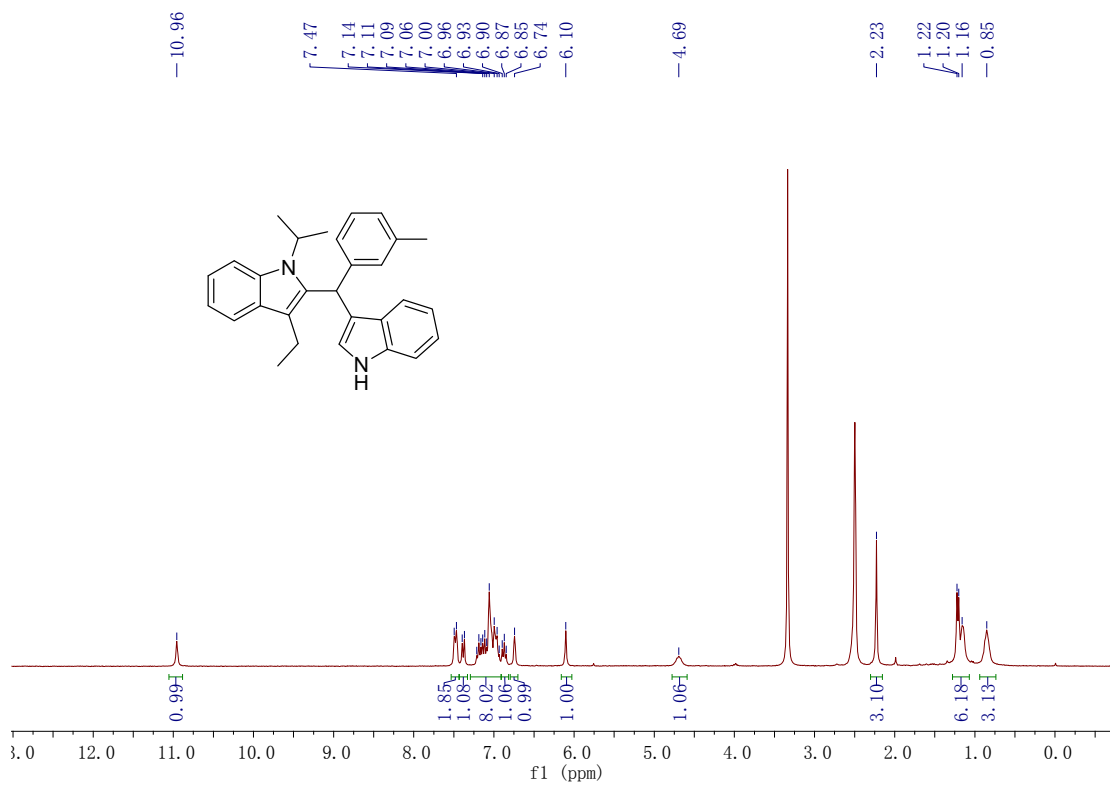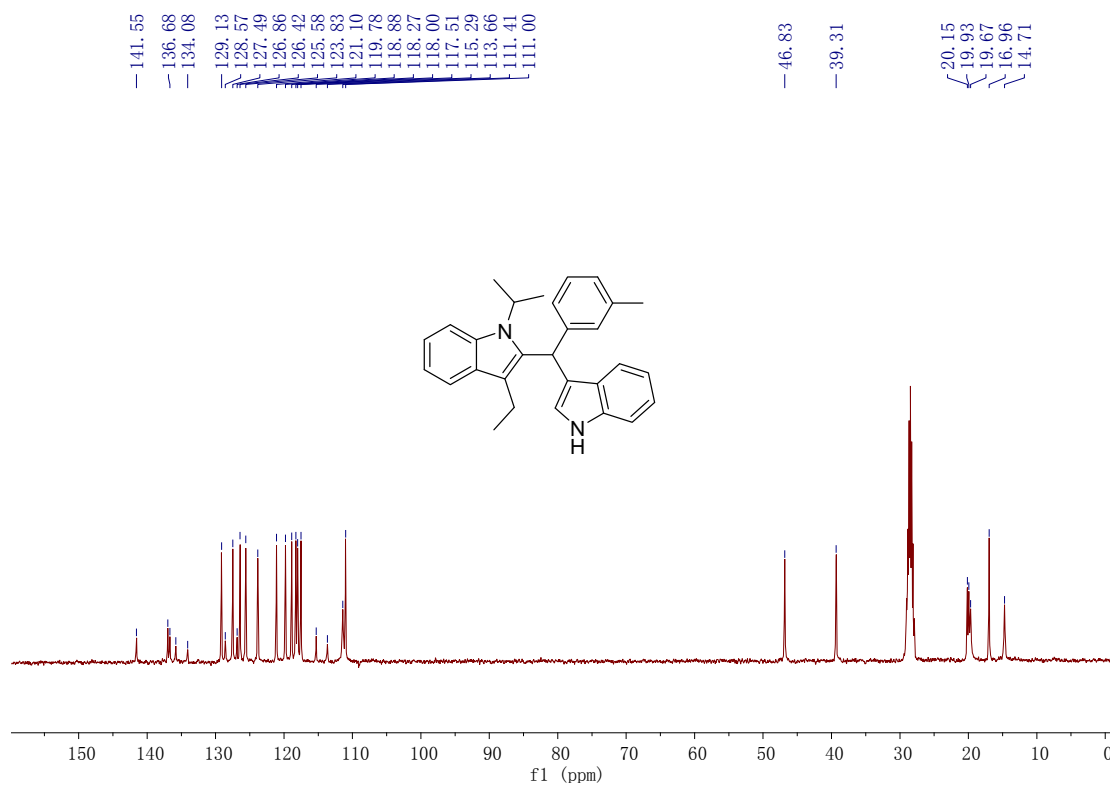

**Figure S10.**  $^1\text{H}$ - (upper) and  $^{13}\text{C}$ -NMR (bottom) of **10j**

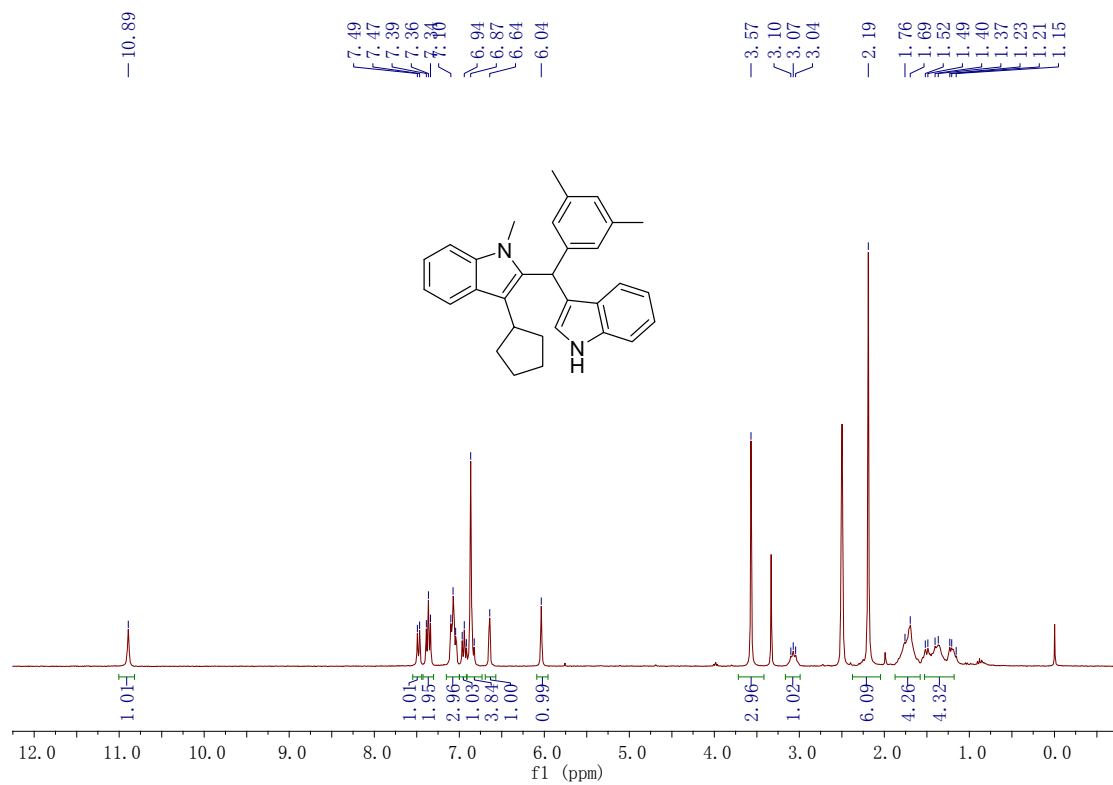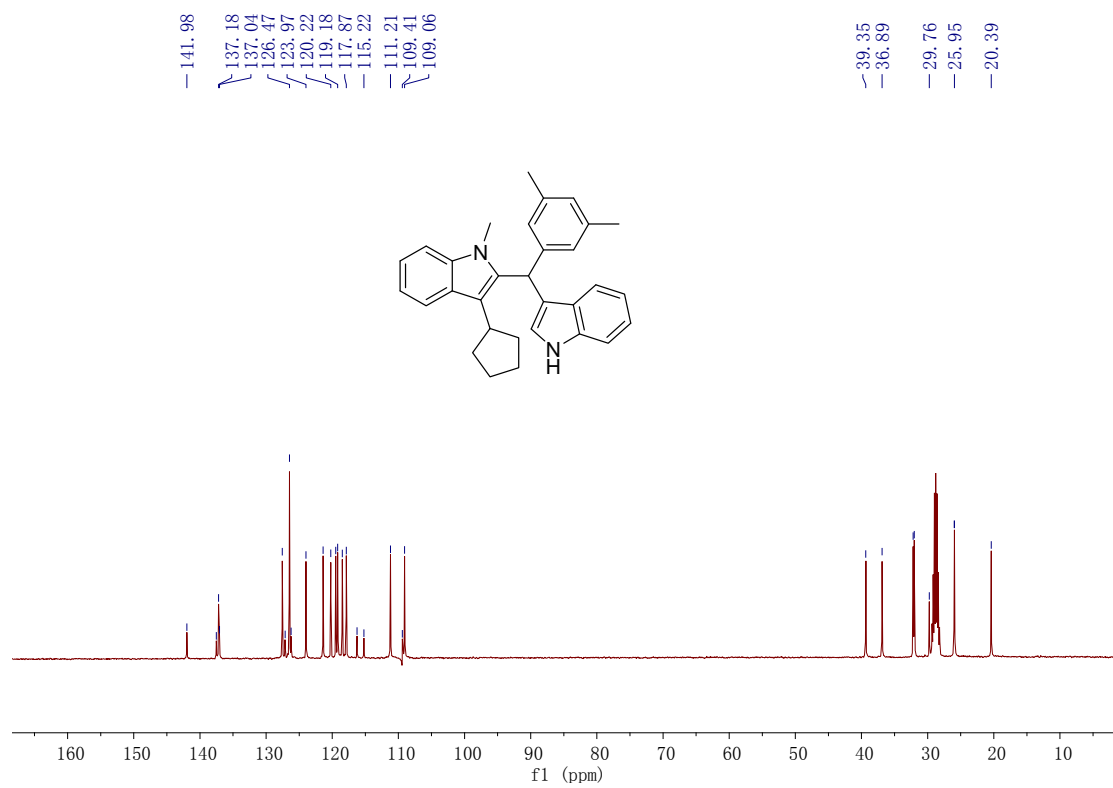

Figure S11.  $^1\text{H}$ - (upper) and  $^{13}\text{C}$ -NMR (bottom) of 10k



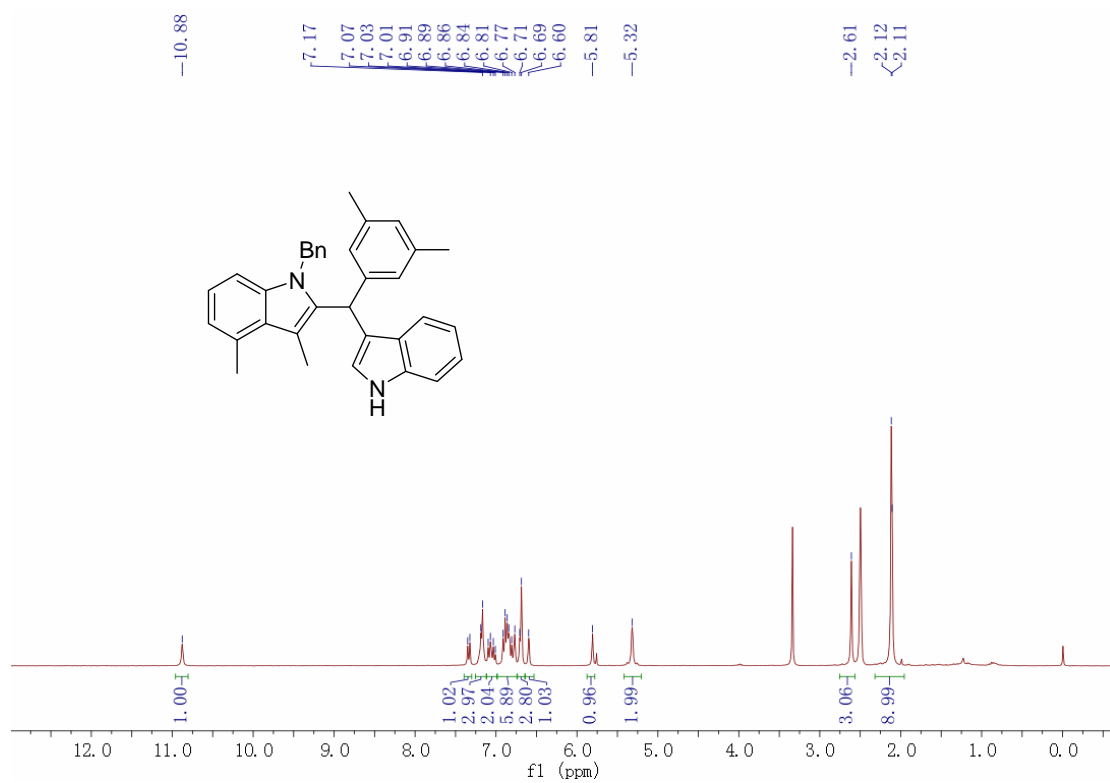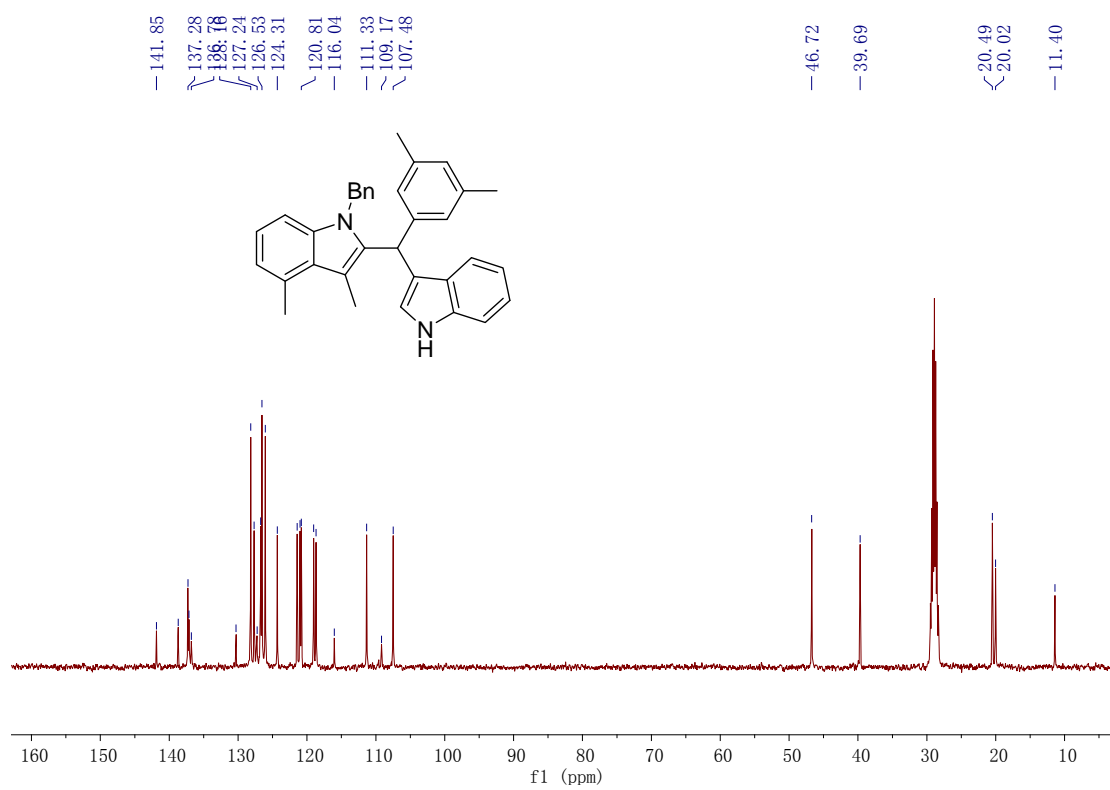

**Figure S12.**  $^1\text{H}$ - (upper) and  $^{13}\text{C}$ -NMR (bottom) of **101**

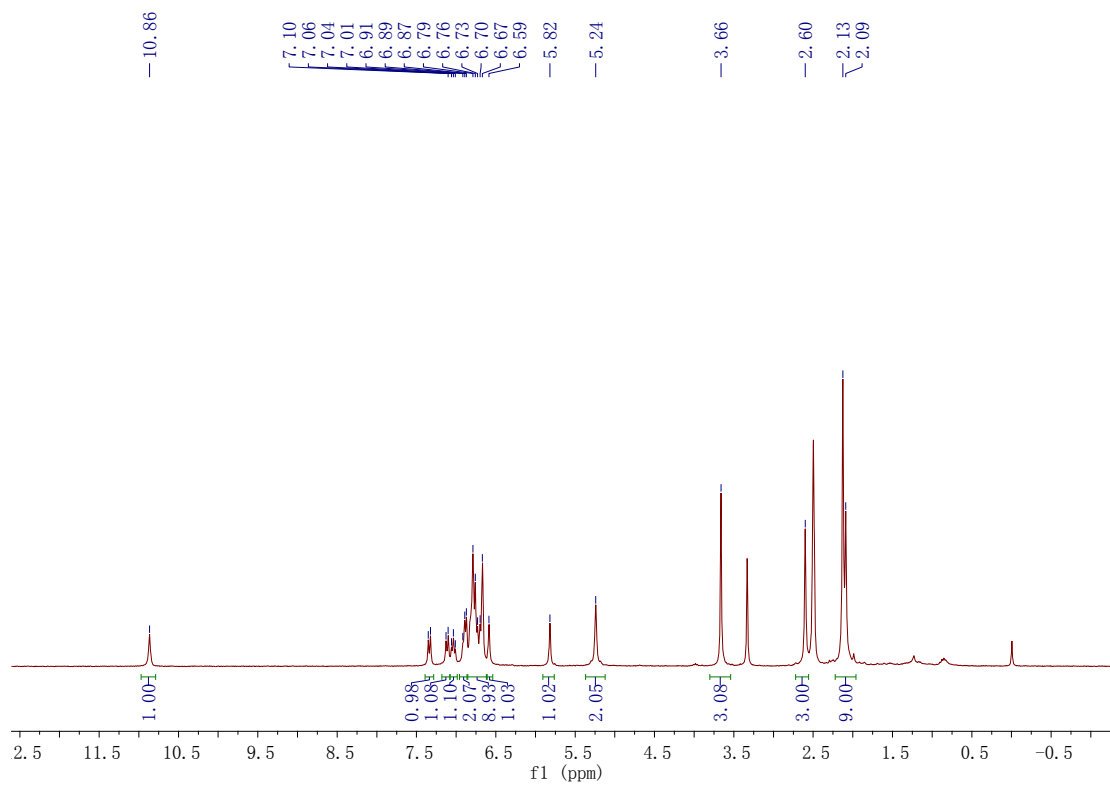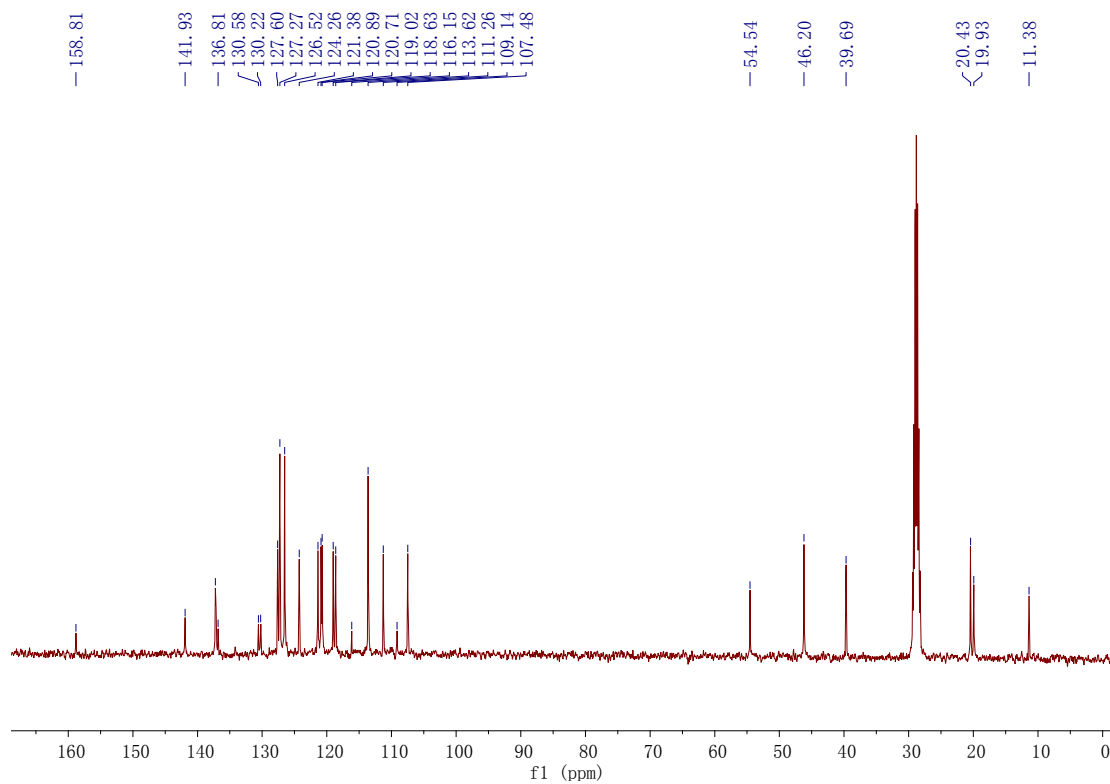

Figure S13.  $^1\text{H}$ - (upper) and  $^{13}\text{C}$ -NMR (bottom) of **10m**

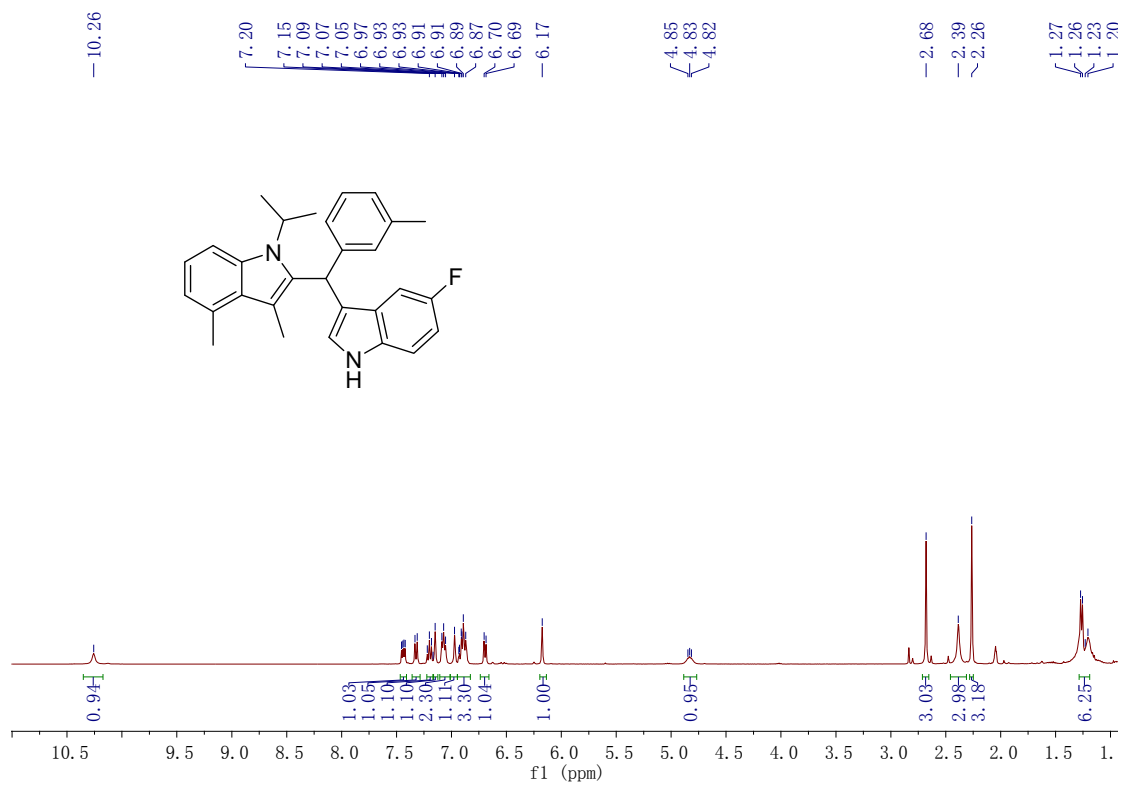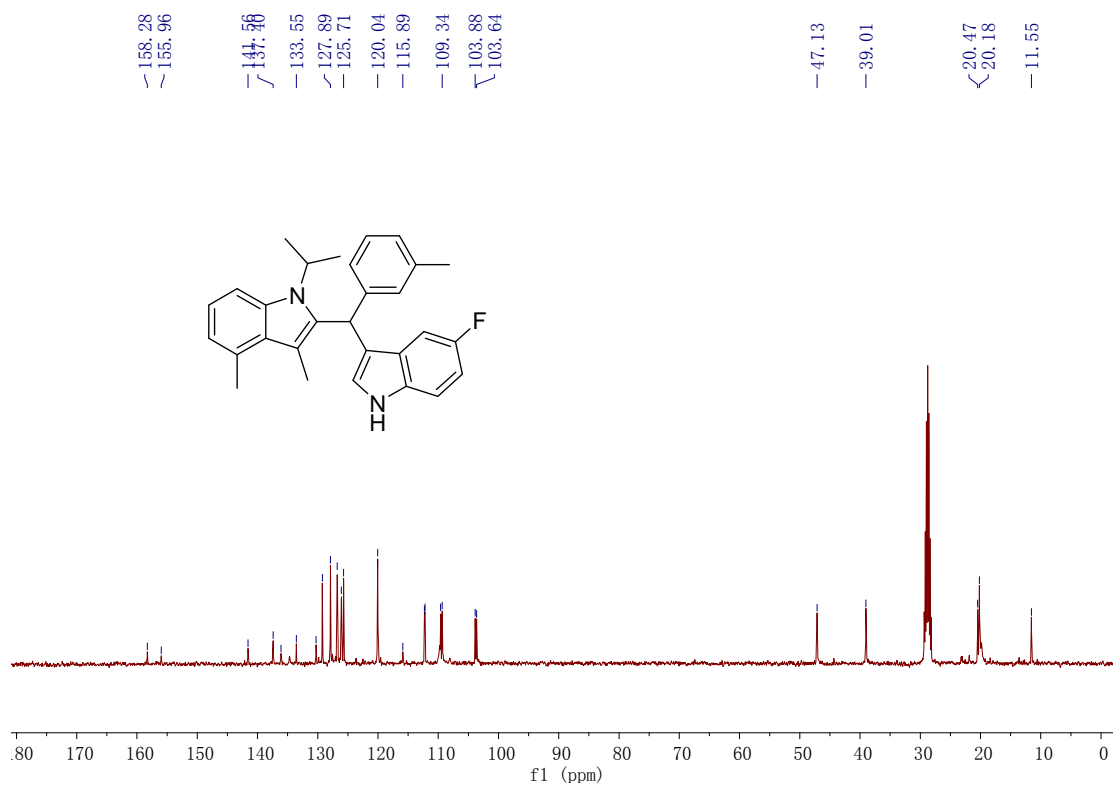

Figure S14.  $^1\text{H}$ - (upper) and  $^{13}\text{C}$ -NMR (bottom) of 10n

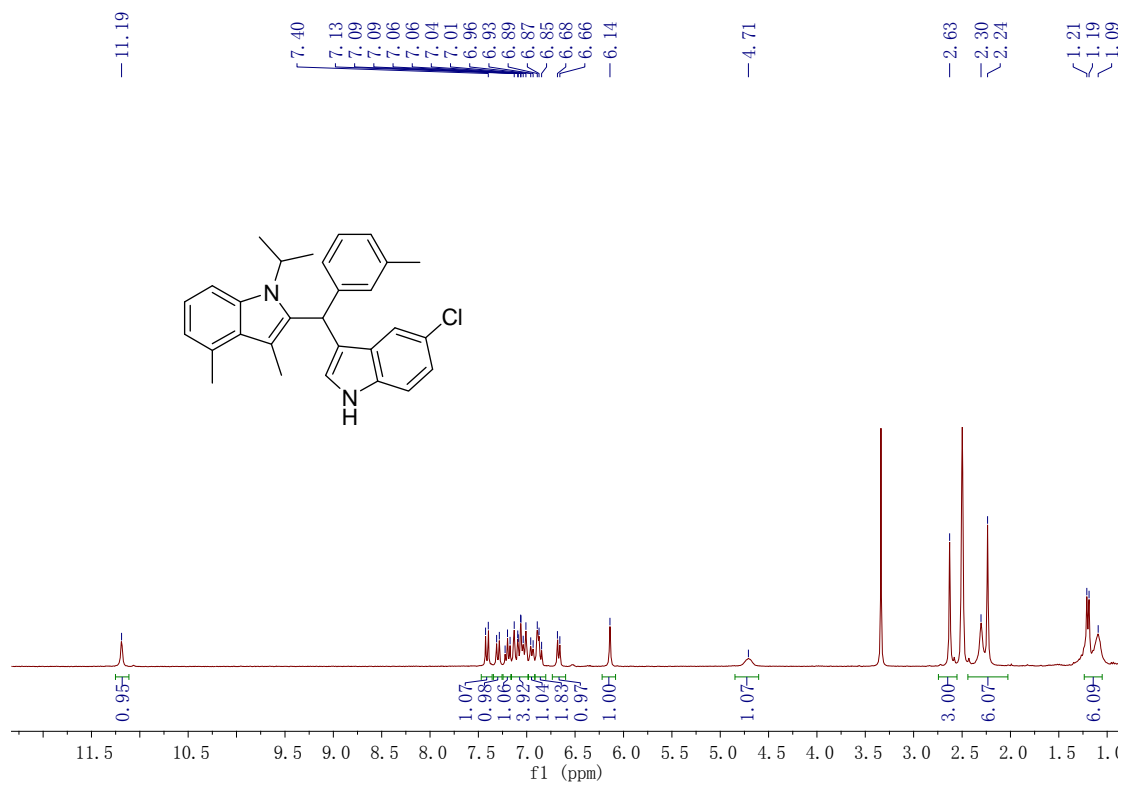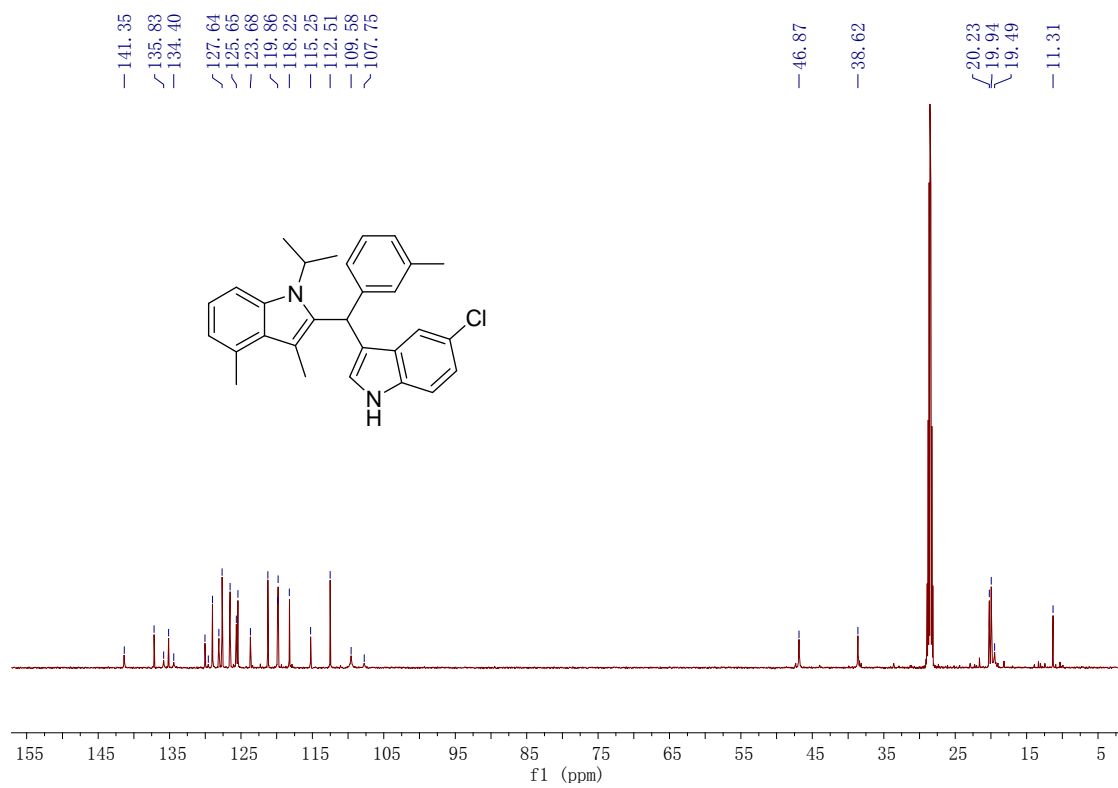

**Figure S15.** <sup>1</sup>H- (upper) and <sup>13</sup>C-NMR (bottom) of **10o**

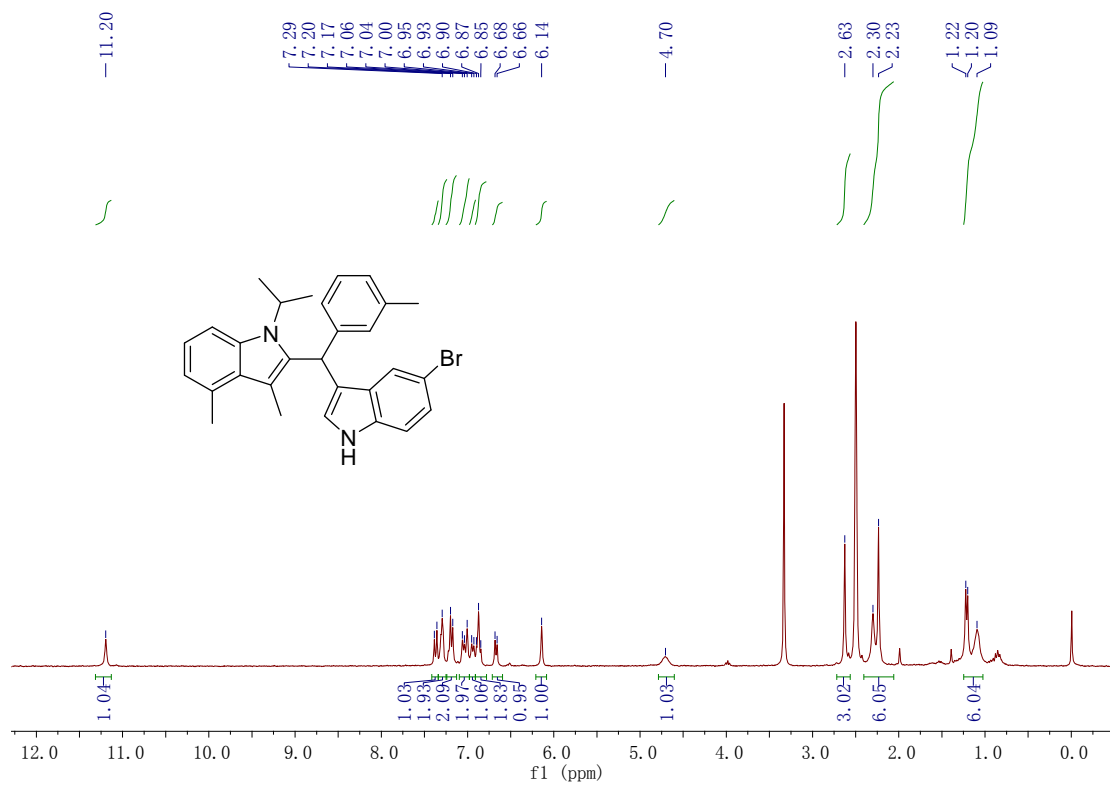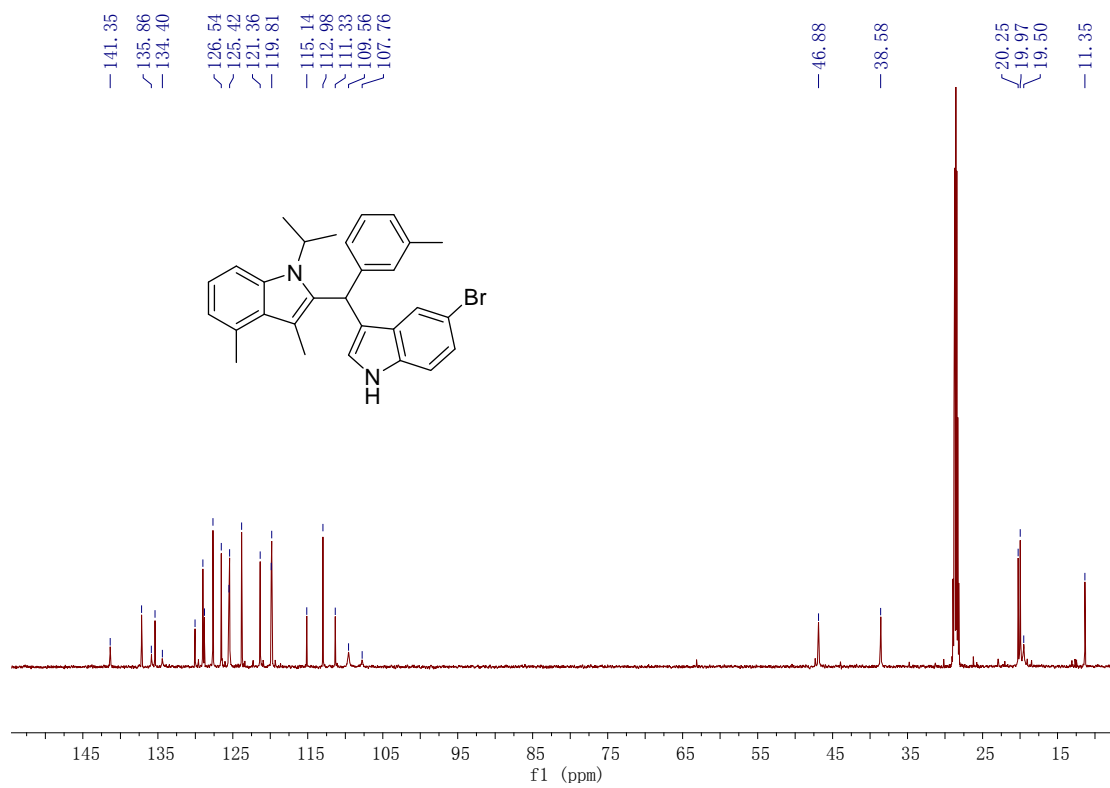

**Figure S16.** <sup>1</sup>H- (upper) and <sup>13</sup>C-NMR (bottom) of **10p**

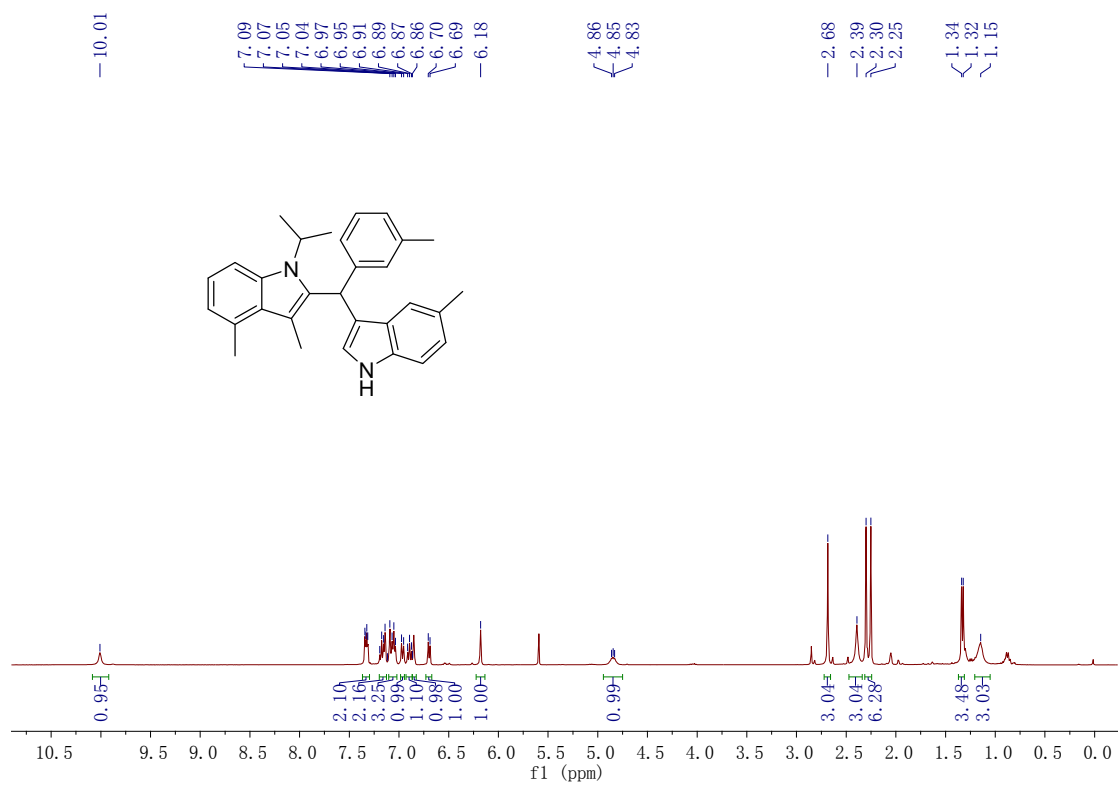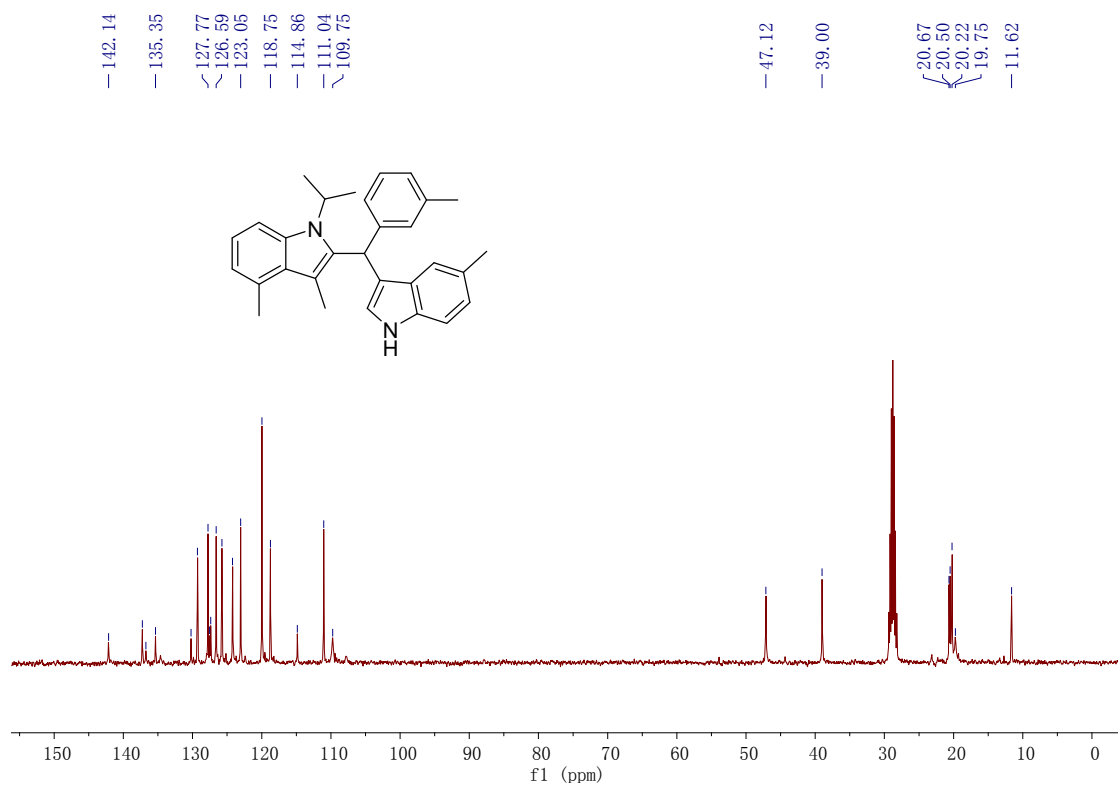

Figure S17.  $^1\text{H}$ - (upper) and  $^{13}\text{C}$ -NMR (bottom) of 10q

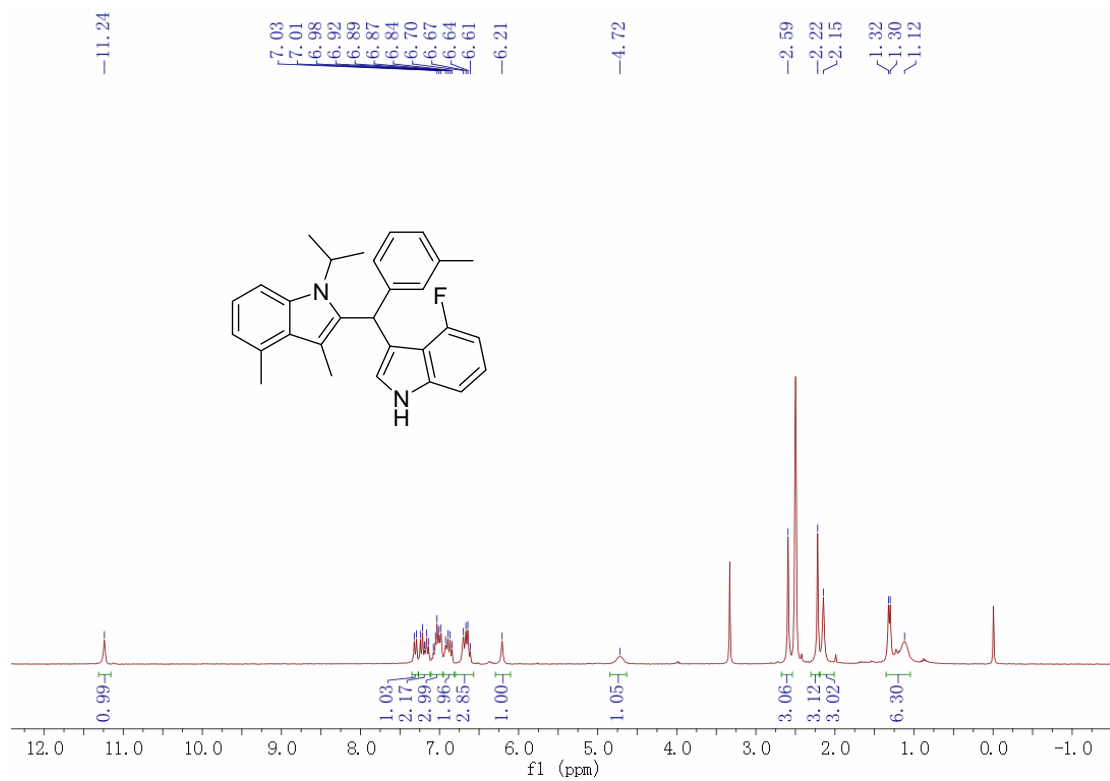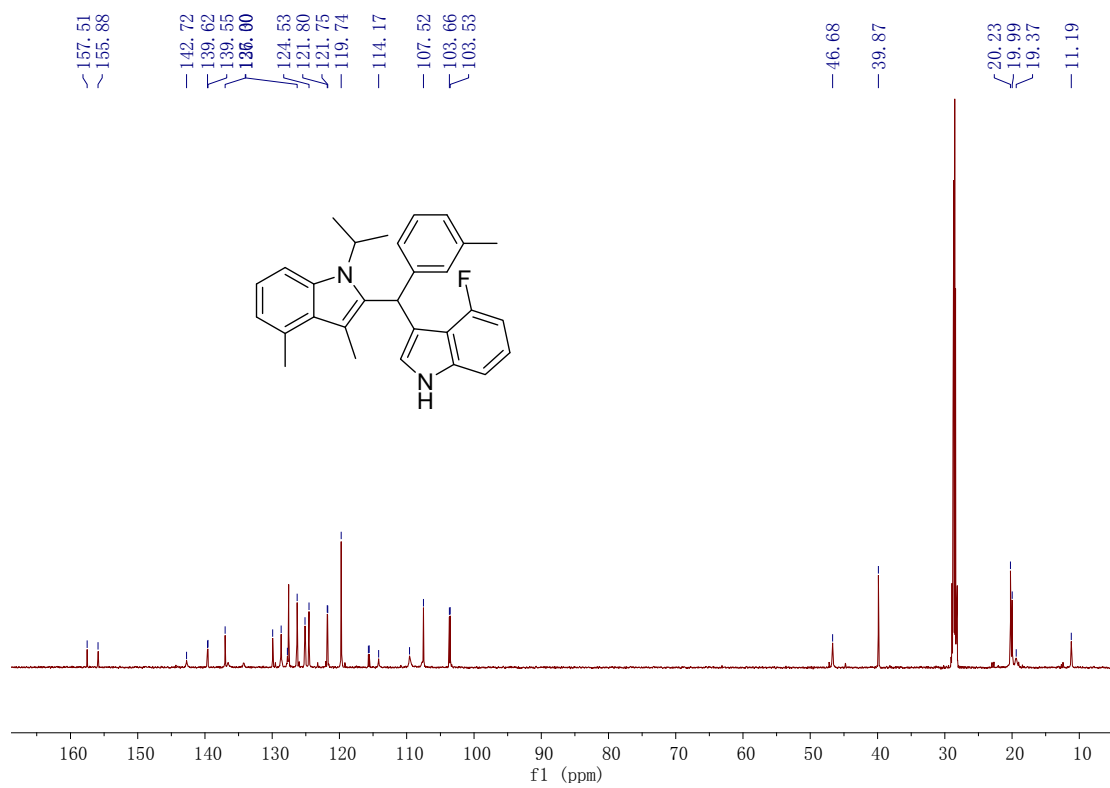

**Figure S18.**  $^1\text{H}$ - (upper) and  $^{13}\text{C}$ -NMR (bottom) of **10r**

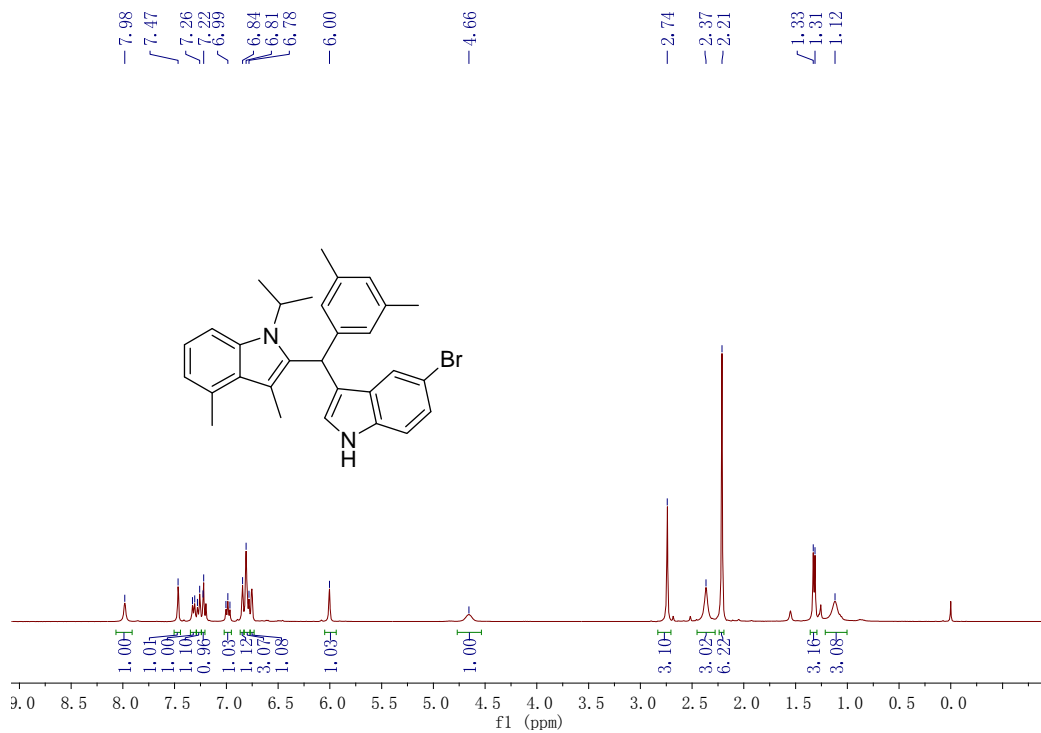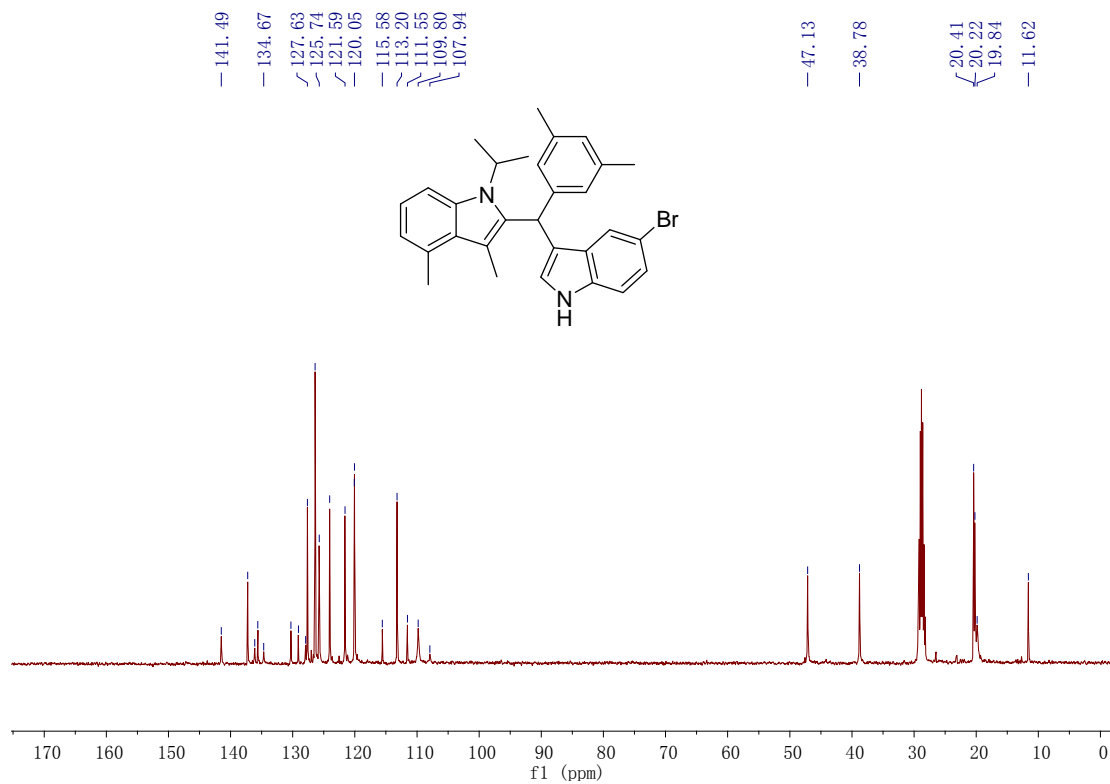

**Figure S19.** <sup>1</sup>H- (upper) and <sup>13</sup>C-NMR (bottom) of 10s



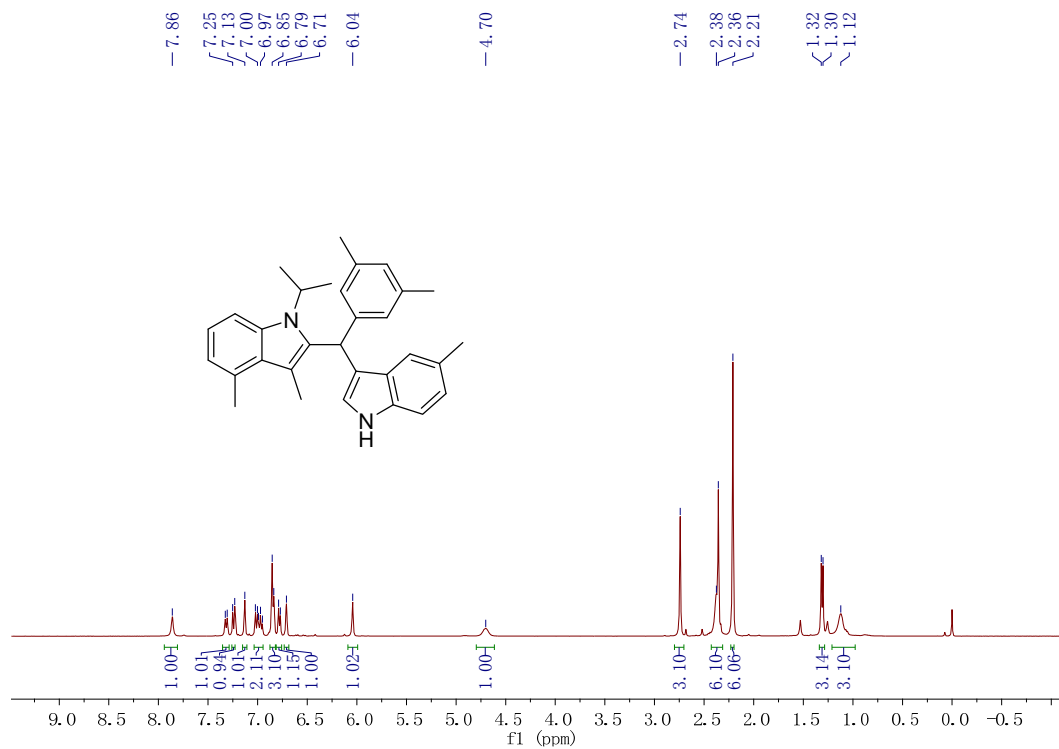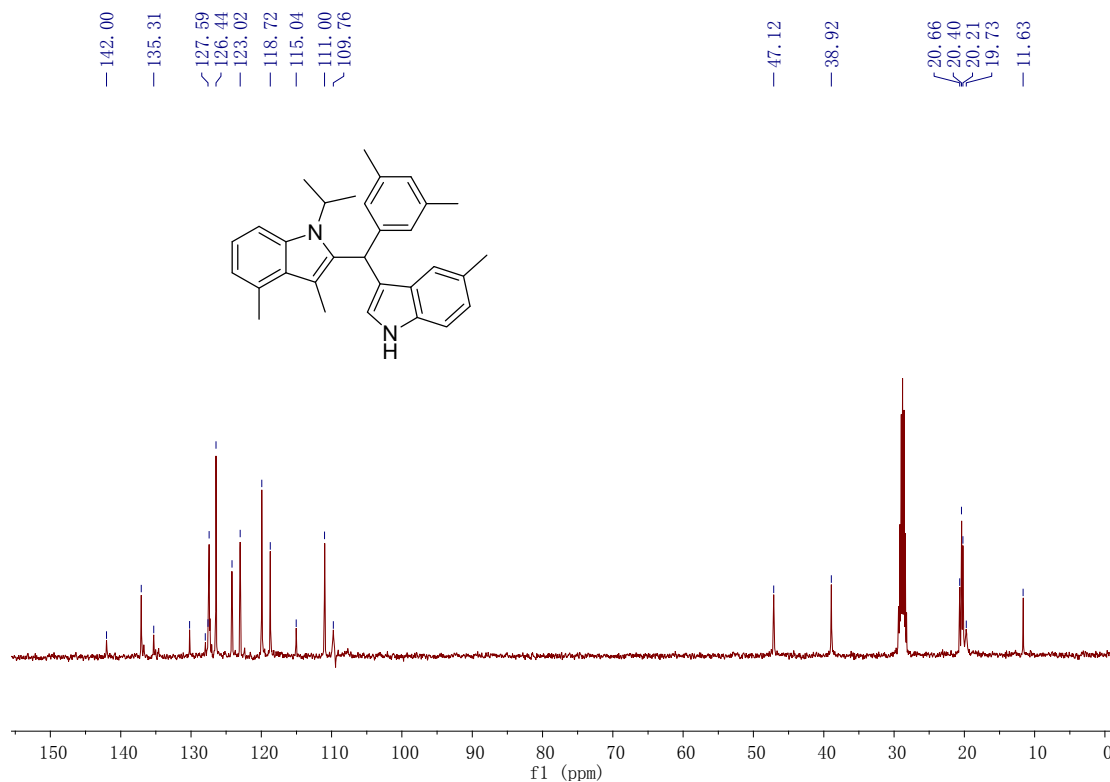

**Figure S20.** <sup>1</sup>H- (upper) and <sup>13</sup>C-NMR (bottom) of **10t**

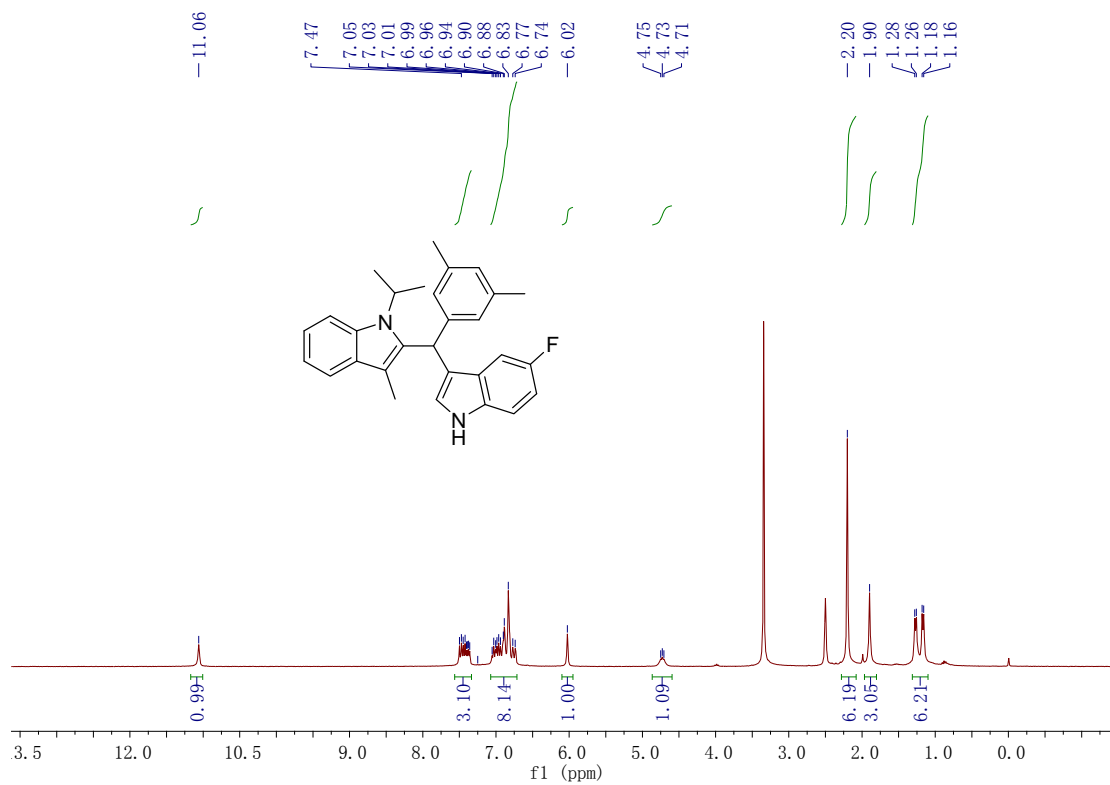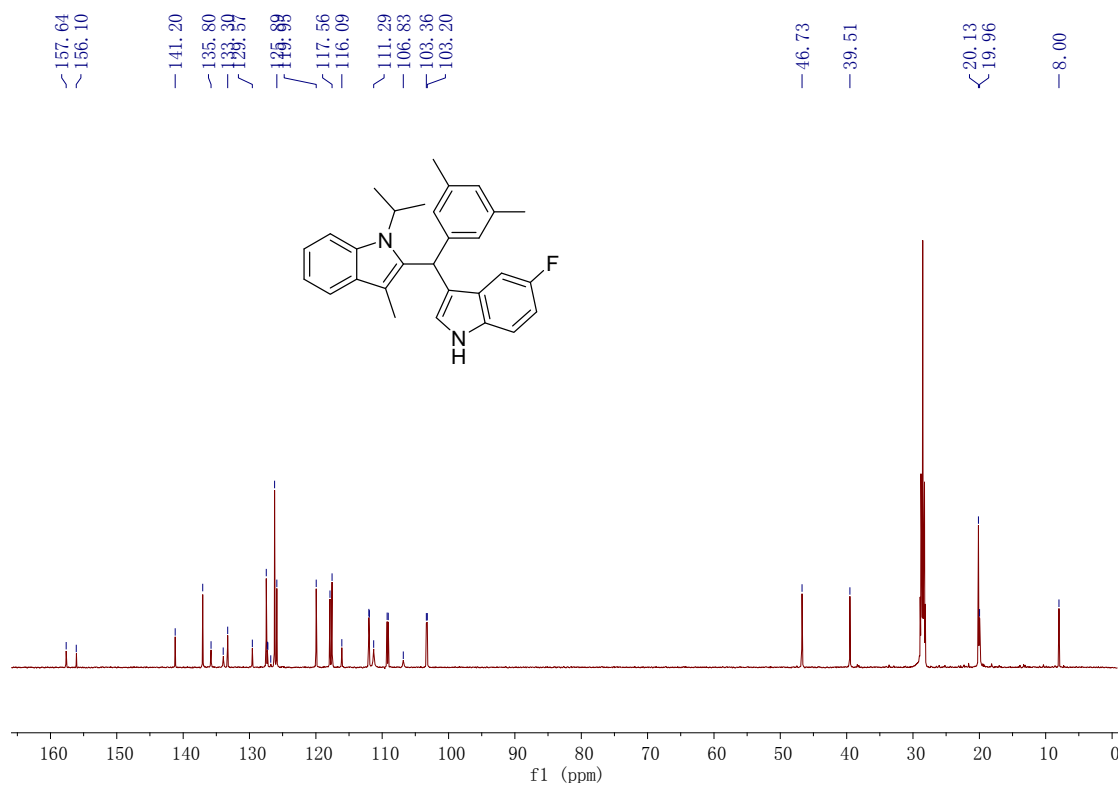

Figure S21. <sup>1</sup>H- (upper) and <sup>13</sup>C-NMR (bottom) of 10u

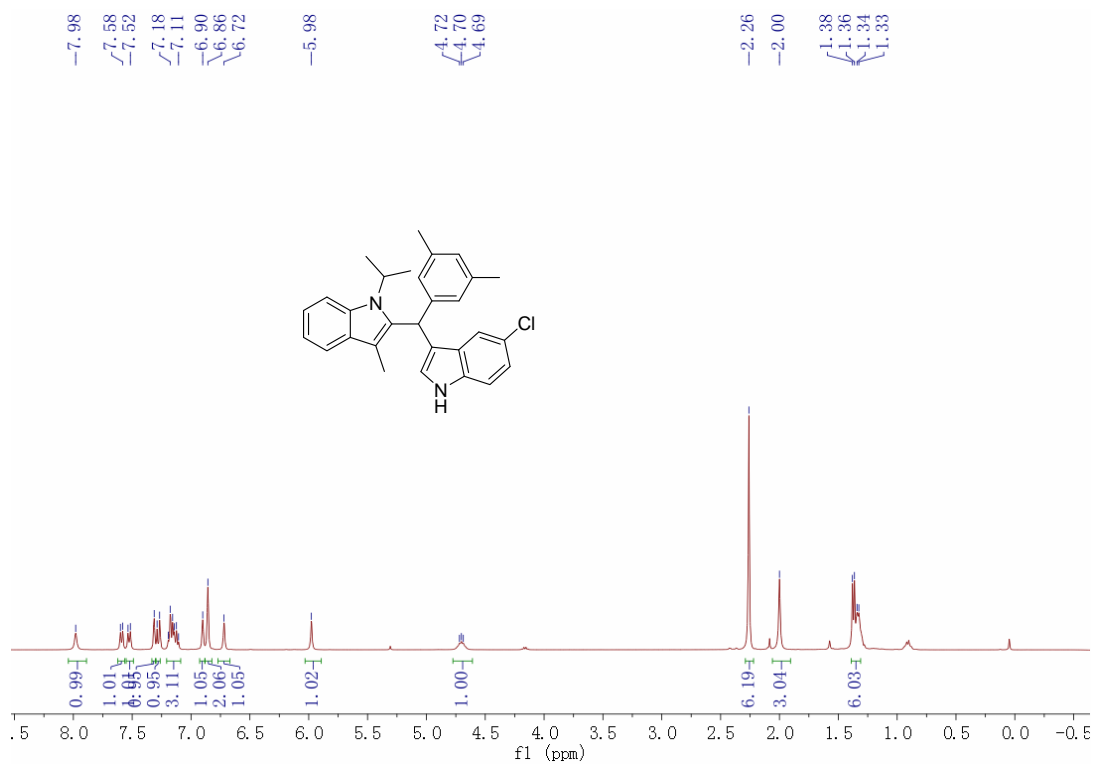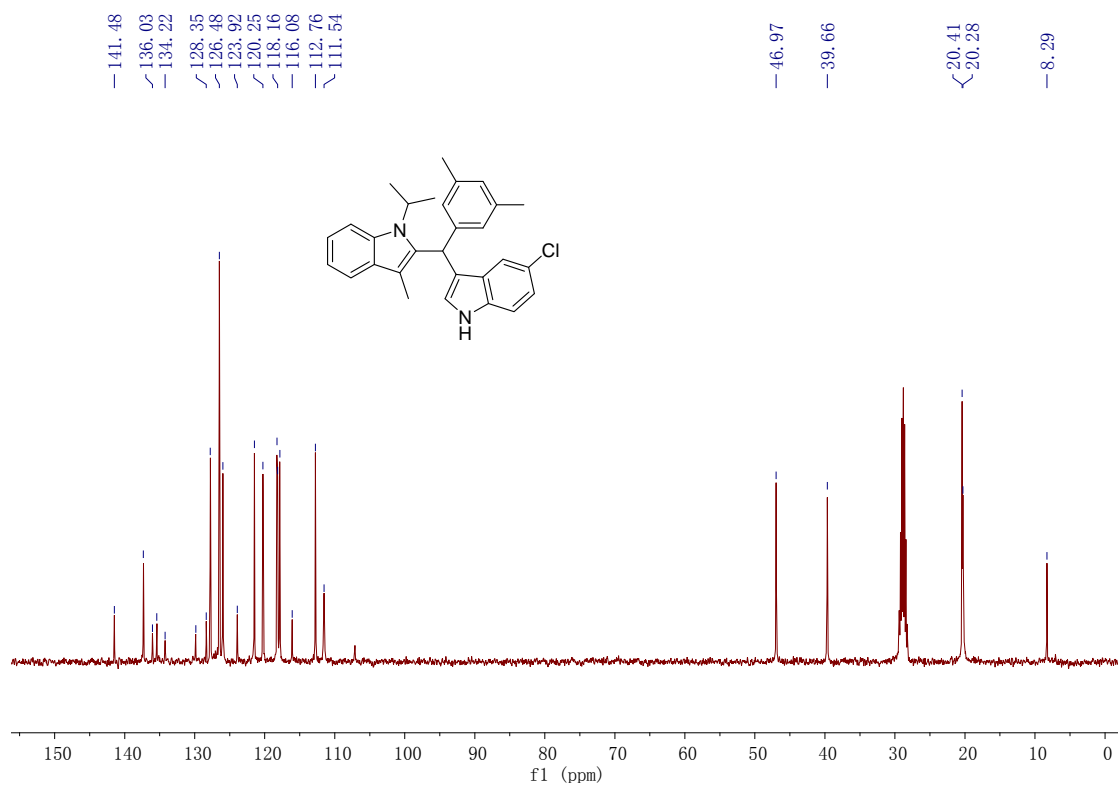

**Figure S22.**  $^1\text{H}$ - (upper) and  $^{13}\text{C}$ -NMR (bottom) of **10v**

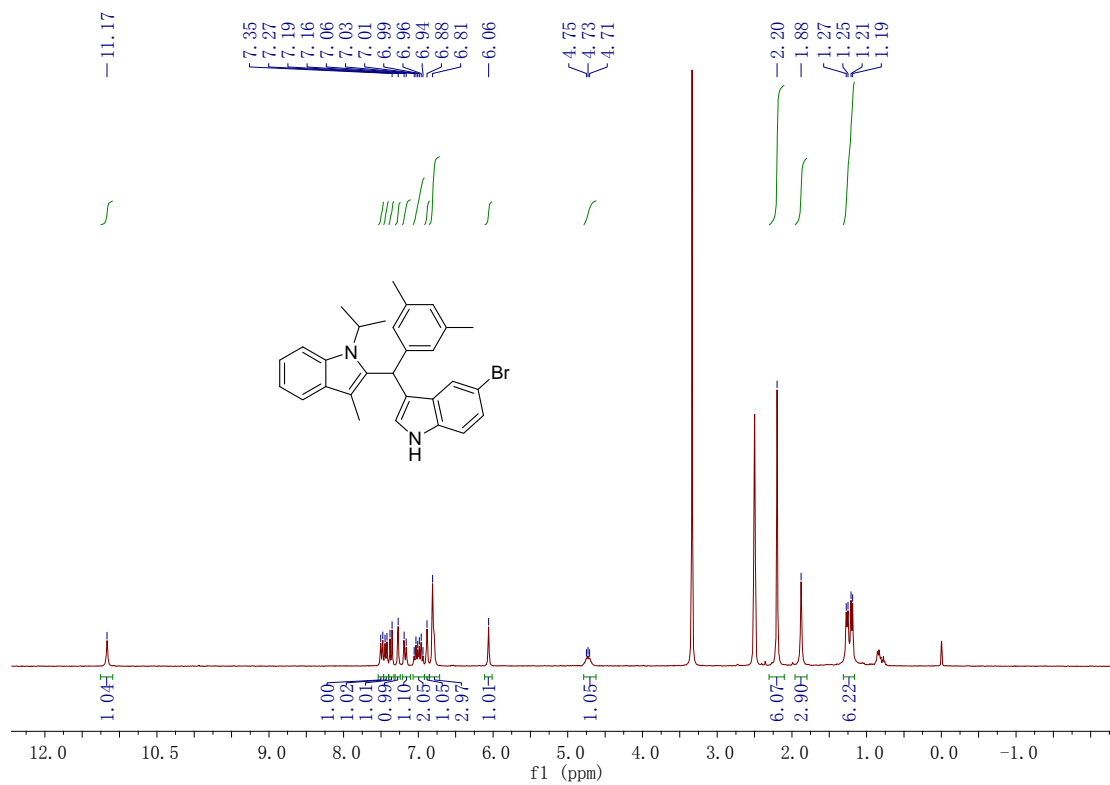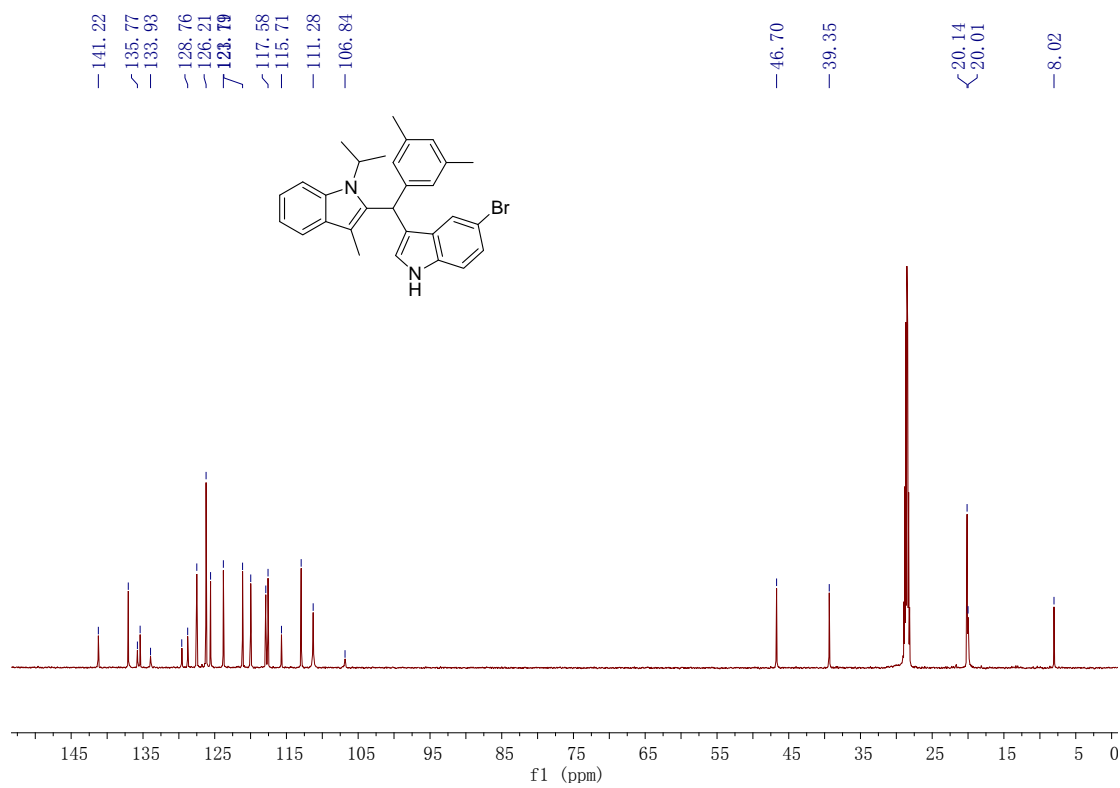

Figure S23. <sup>1</sup>H- (upper) and <sup>13</sup>C-NMR (bottom) of 10w

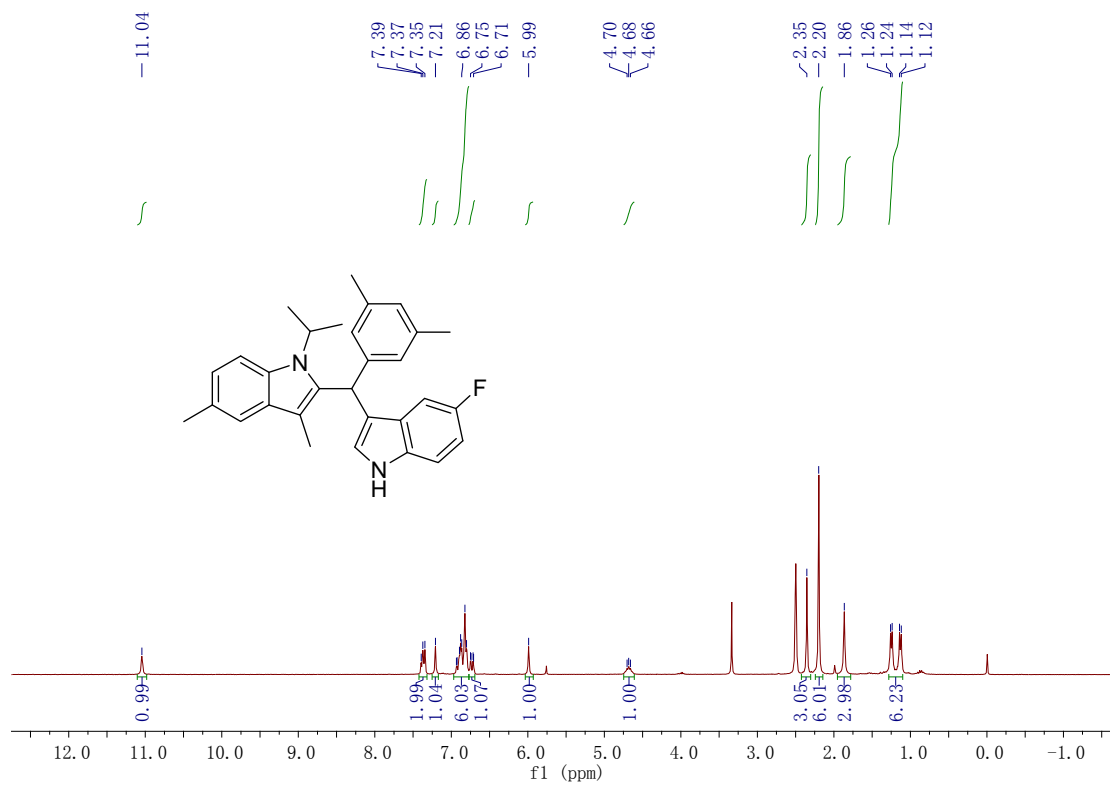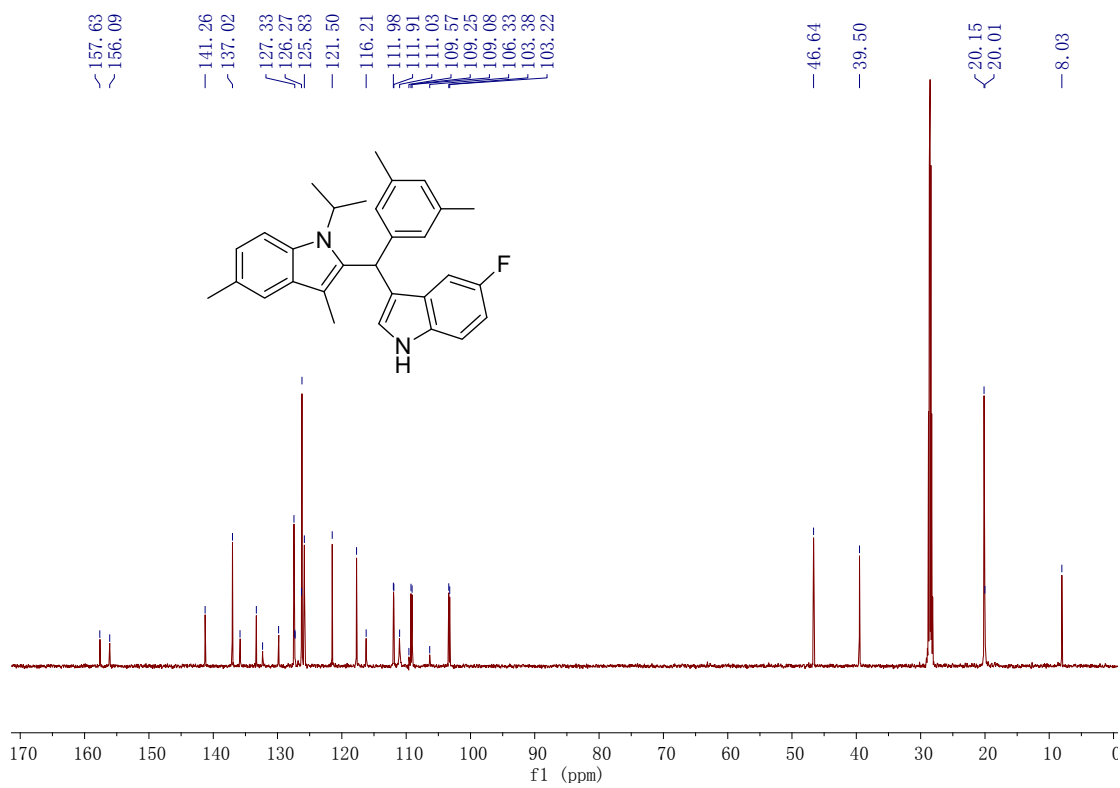

Figure S24. <sup>1</sup>H- (upper) and <sup>13</sup>C-NMR (bottom) of 10x

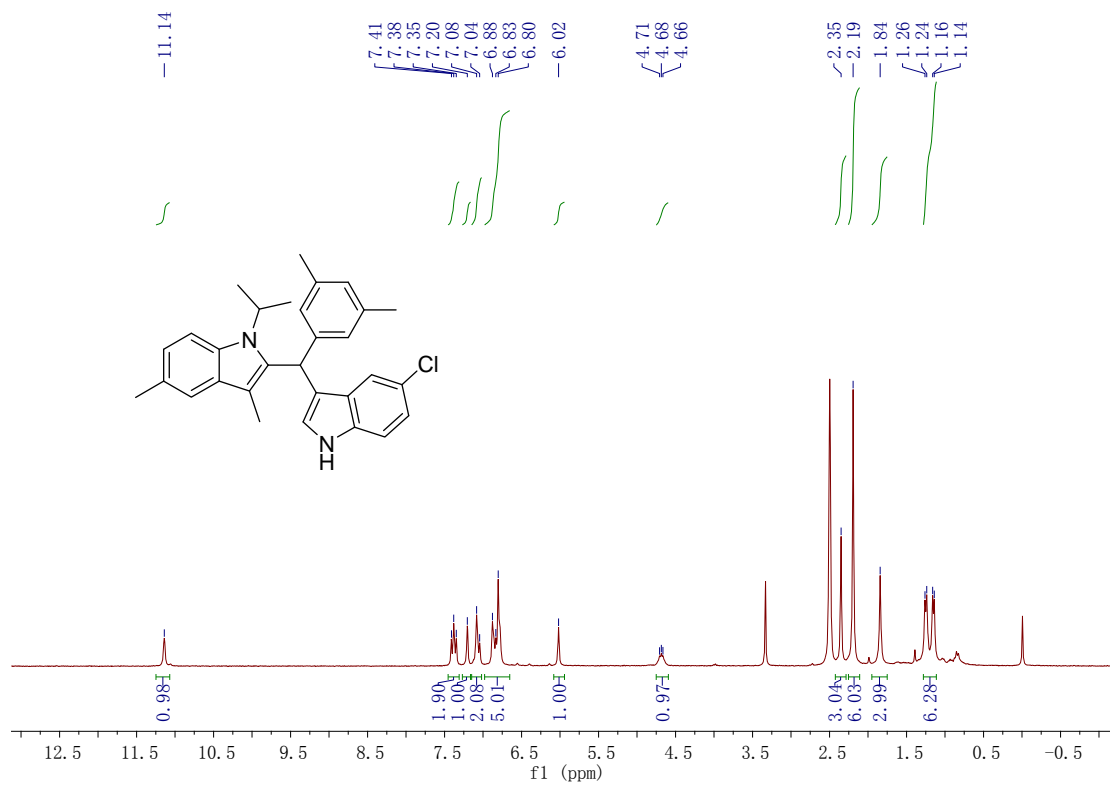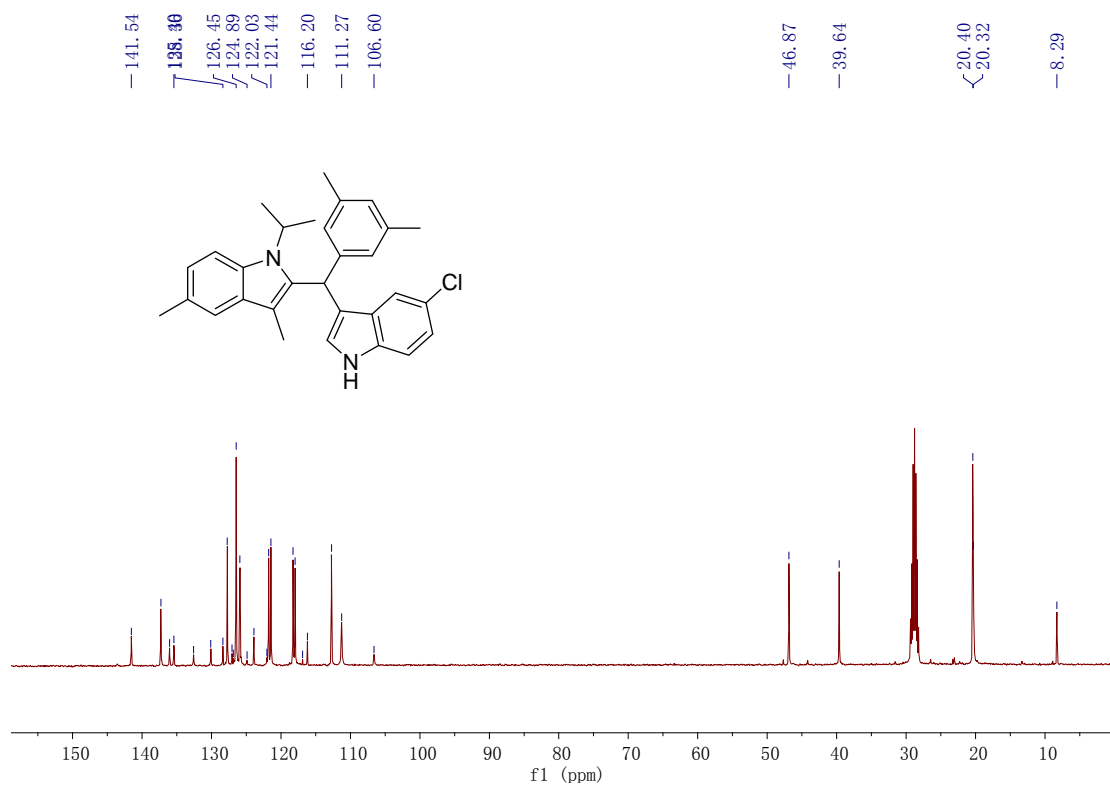

**Figure S25.** <sup>1</sup>H- (upper) and <sup>13</sup>C-NMR (bottom) of **10y**

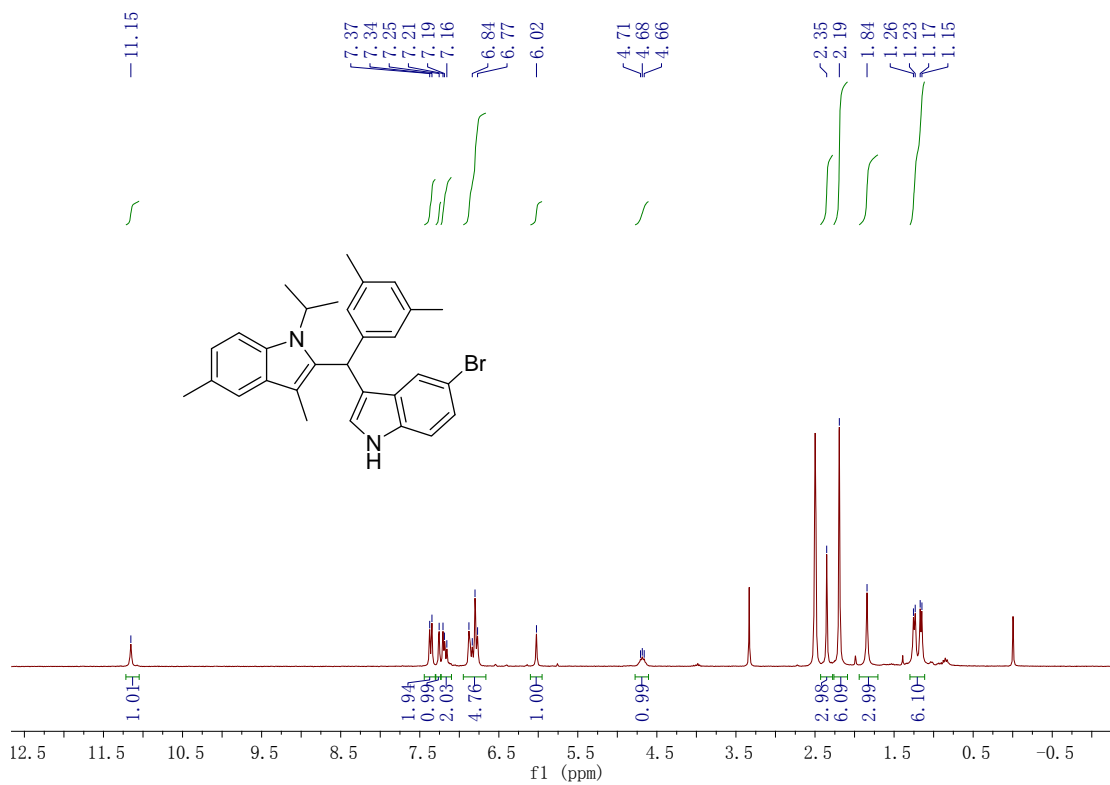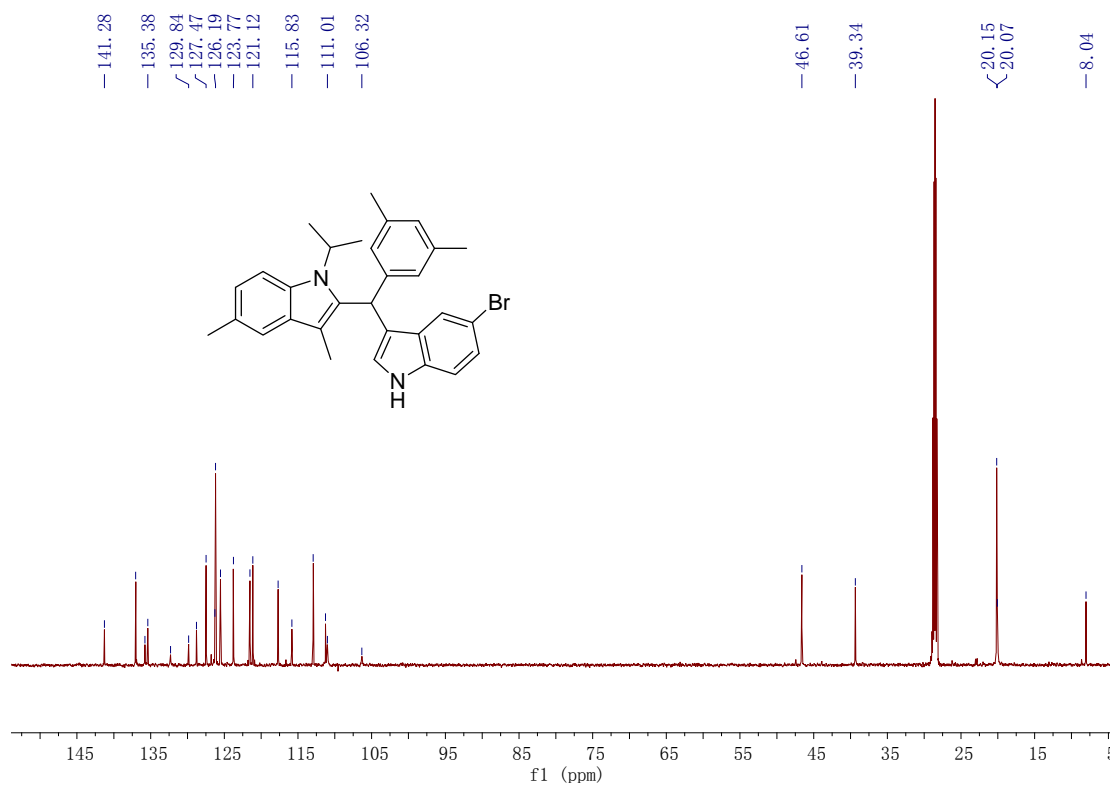

**Figure S26.** <sup>1</sup>H- (upper) and <sup>13</sup>C-NMR (bottom) of **10z**

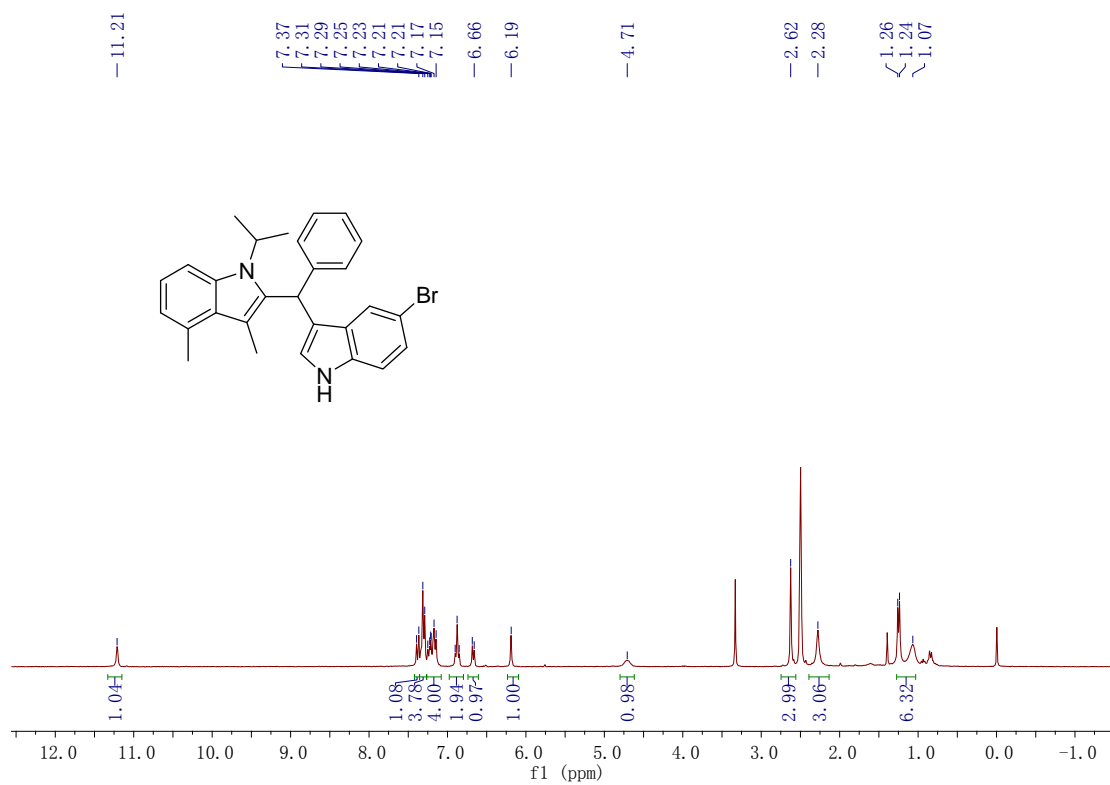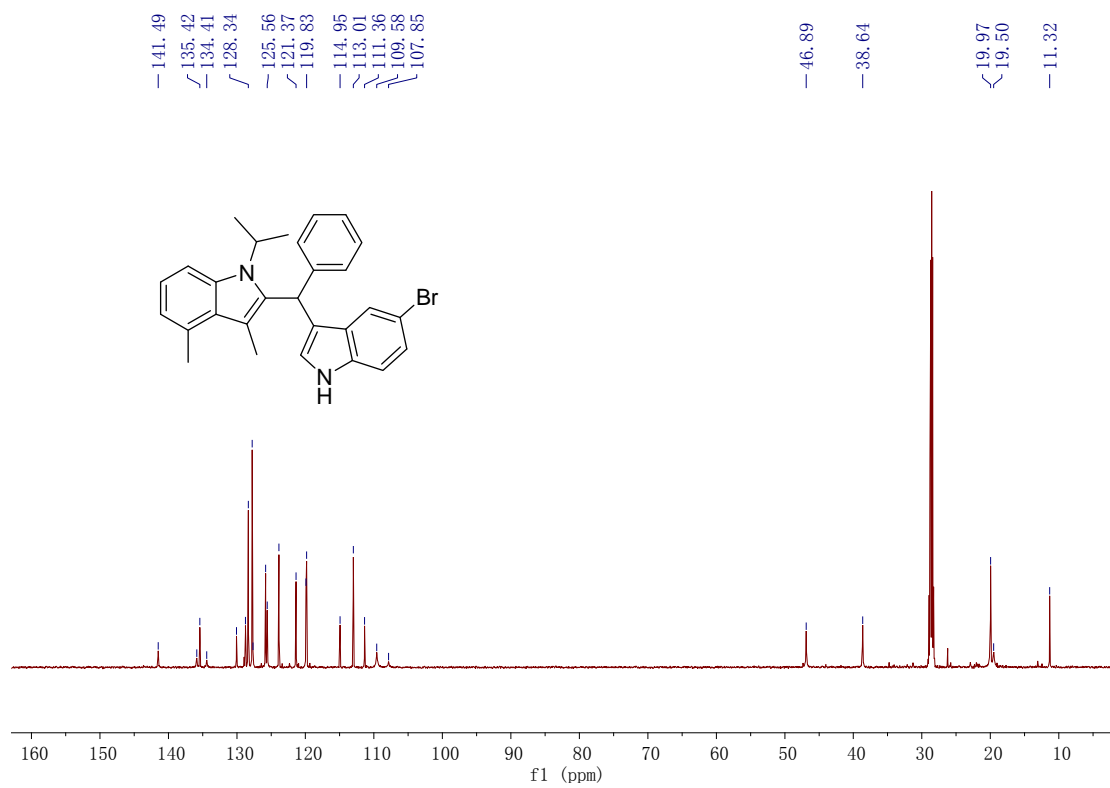

Figure S27.  $^1\text{H}$ - (upper) and  $^{13}\text{C}$ -NMR (bottom) of 10aa



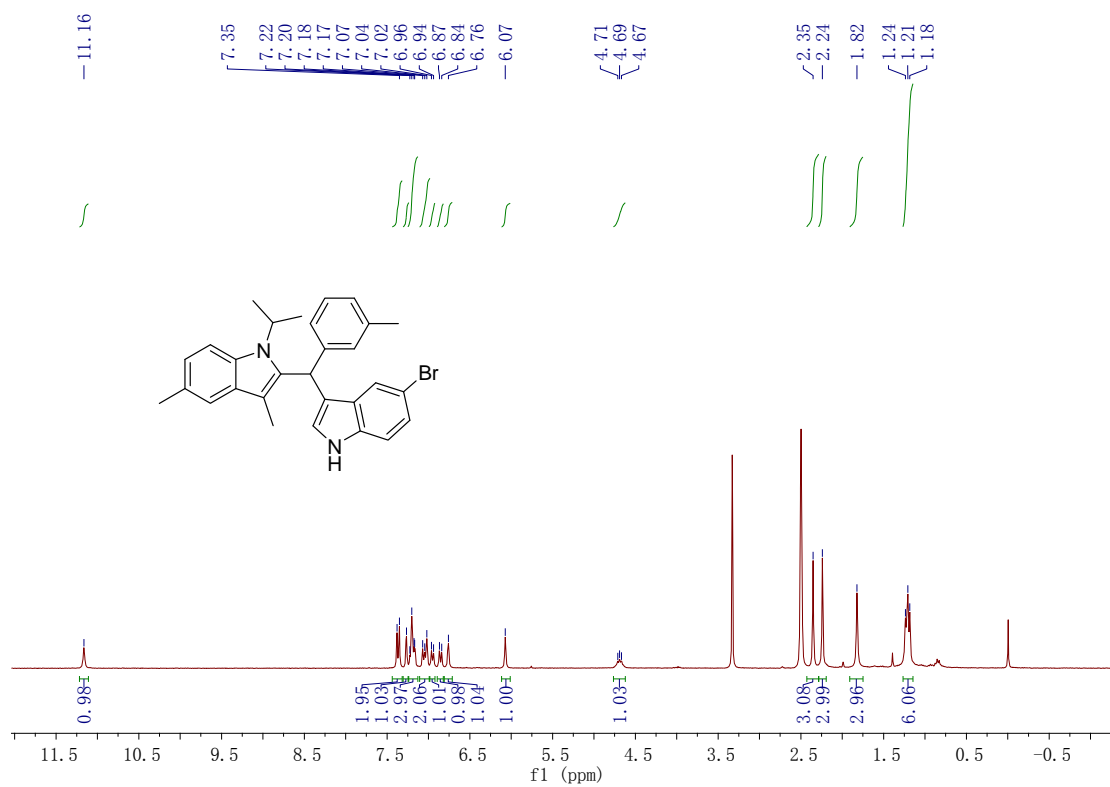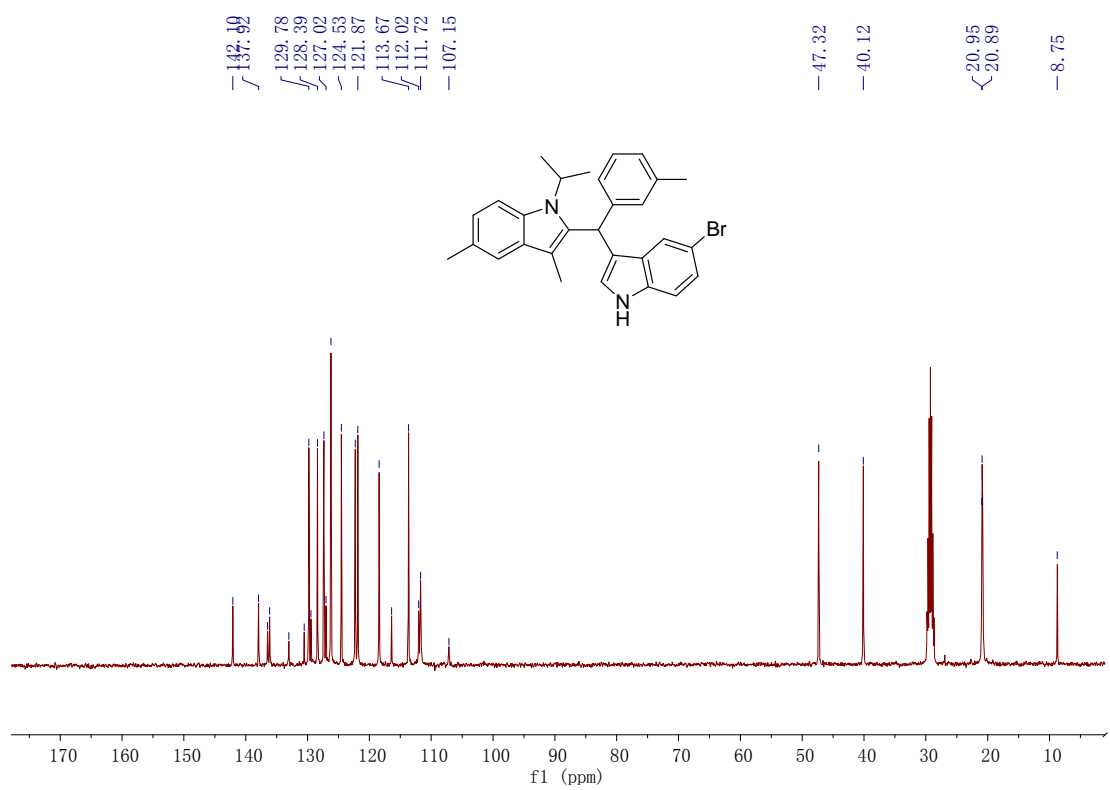

Figure S28. <sup>1</sup>H- (upper) and <sup>13</sup>C-NMR (bottom) of 10bb

#### 4. Copies of HPLC and integration area

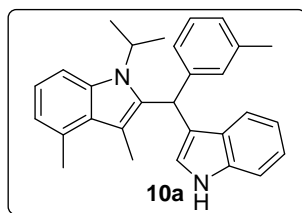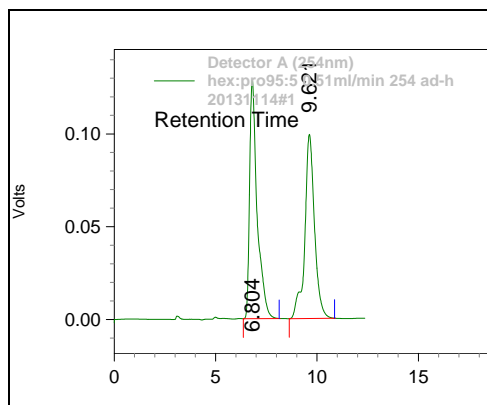

| Peak | RT (min) | Area (V*sec) | Area % | Height (V) | Height % |
|------|----------|--------------|--------|------------|----------|
| 1    | 6.804    | 3340329      | 50.24  | 127891     | 56.36    |
| 2    | 9.621    | 3307836      | 49.76  | 99039      | 43.64    |

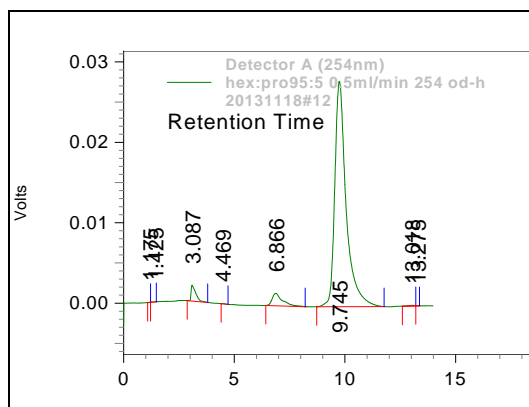

| Peak | RT (min) | Area (V*sec) | Area % | Height (V) | Height % |
|------|----------|--------------|--------|------------|----------|
| 1    | 6.866    | 44633        | 4.27   | 1547       | 5.23     |
| 2    | 9.745    | 1001268      | 95.73  | 28023      | 94.77    |

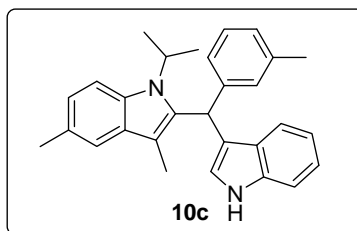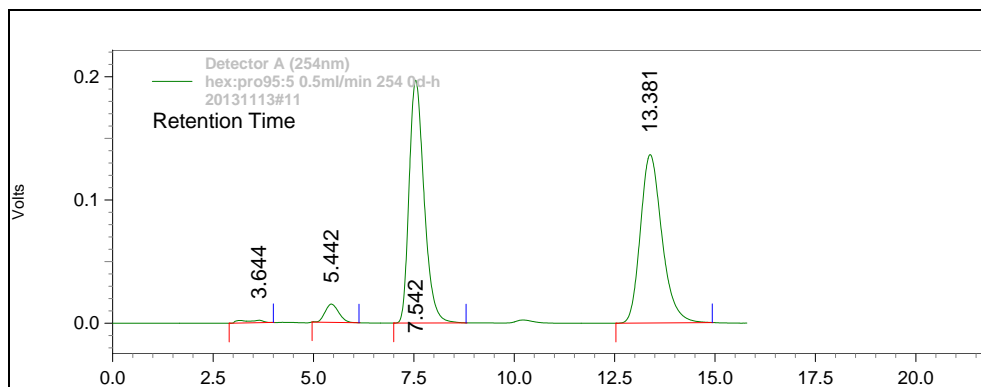

| Peak | RT (min) | Area (V*sec) | Area % | Height (V) | Height % |
|------|----------|--------------|--------|------------|----------|
| 1    | 7.542    | 5097802      | 49.74  | 196901     | 59.00    |
| 2    | 13.381   | 5150500      | 50.26  | 136778     | 41.00    |

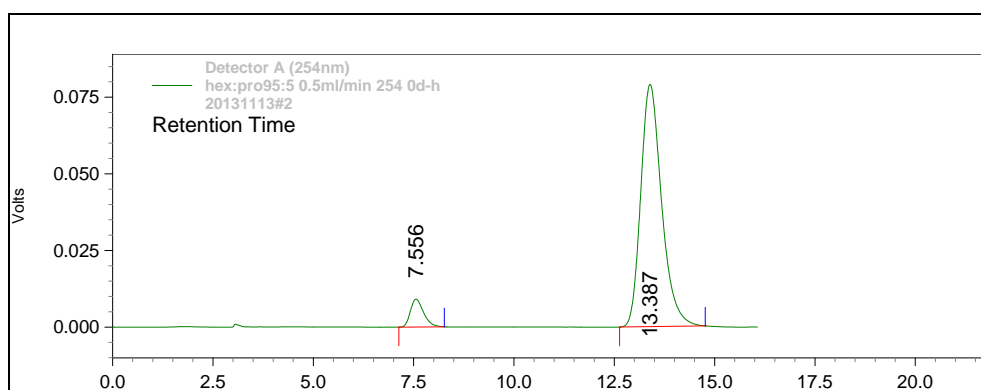

| Peak | RT (min) | Area (V*sec) | Area % | Height (V) | Height % |
|------|----------|--------------|--------|------------|----------|
| 1    | 7.556    | 203028       | 6.64   | 9048       | 10.28    |
| 2    | 13.387   | 2855285      | 93.36  | 78936      | 89.72    |

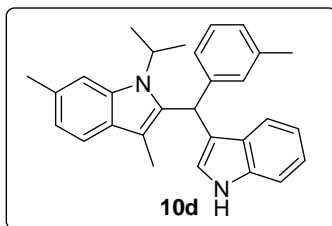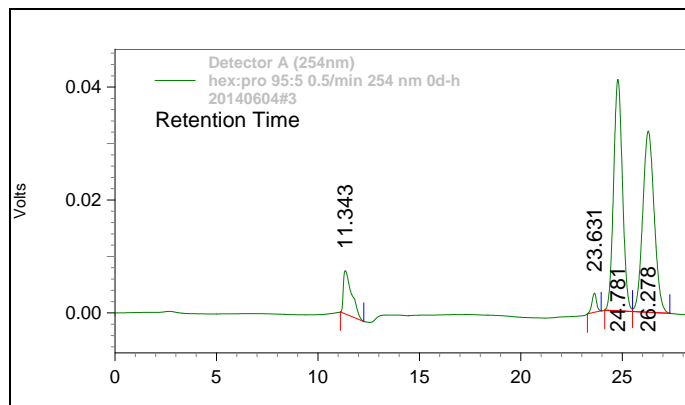

| Peak | RT<br>(min) | Area<br>(V*sec) | Area % | Height<br>(V) | Height % |
|------|-------------|-----------------|--------|---------------|----------|
| 1    | 24.781      | 1241689         | 49.68  | 40980         | 56.09    |
| 2    | 26.278      | 1257920         | 50.32  | 32075         | 43.91    |

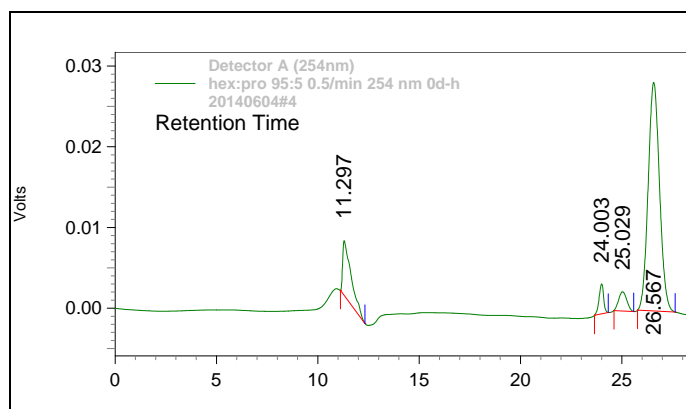

| Peak | RT<br>(min) | Area<br>(V*sec) | Area % | Height<br>(V) | Height % |
|------|-------------|-----------------|--------|---------------|----------|
| 1    | 25.029      | 66091           | 5.65   | 2375          | 7.74     |
| 2    | 26.567      | 1104281         | 94.35  | 28316         | 92.26    |

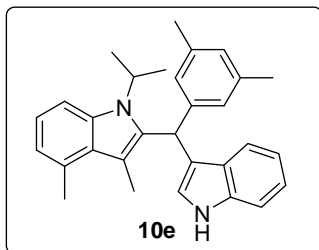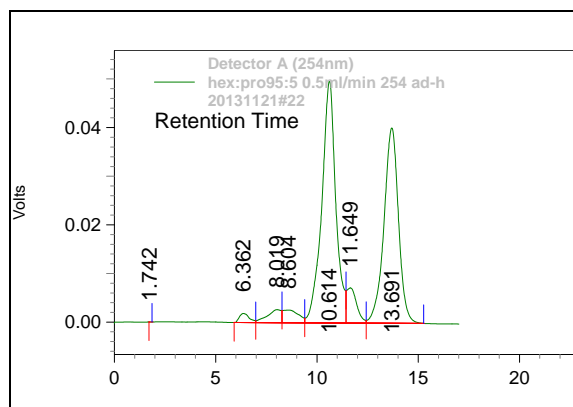

| Peak | RT (min) | Area (V*sec) | Area % | Height (V) | Height % |
|------|----------|--------------|--------|------------|----------|
| 1    | 10.614   | 2107905      | 51.16  | 49757      | 55.33    |
| 2    | 13.691   | 2012341      | 48.84  | 40173      | 44.67    |

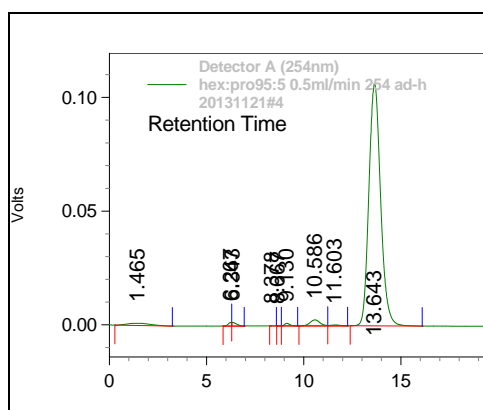

| Peak | RT (min) | Area (V*sec) | Area % | Height (V) | Height % |
|------|----------|--------------|--------|------------|----------|
| 1    | 10.586   | 93292        | 2.05   | 2650       | 2.43     |
| 2    | 13.643   | 4468305      | 97.95  | 106595     | 97.57    |

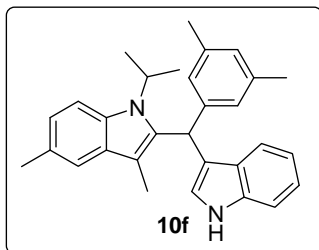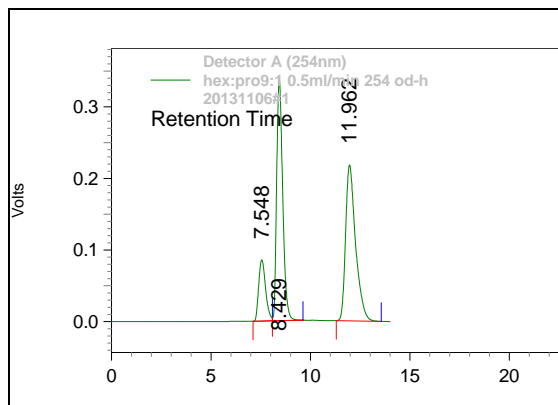

| Peak | RT (min) | Area (V*sec) | Area % | Height (V) | Height % |
|------|----------|--------------|--------|------------|----------|
| 1    | 8.429    | 7158409      | 49.28  | 337628     | 60.78    |
| 2    | 11.962   | 7367088      | 50.72  | 217823     | 39.22    |

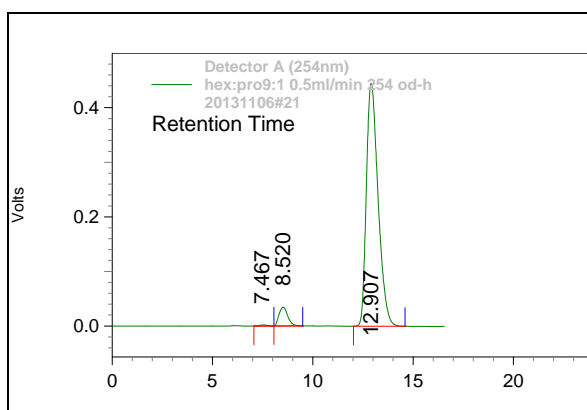

| Peak | RT (min) | Area (V*sec) | Area % | Height (V) | Height % |
|------|----------|--------------|--------|------------|----------|
| 1    | 8.520    | 1051394      | 5.48   | 34616      | 7.22     |
| 2    | 12.907   | 18127975     | 94.52  | 444844     | 92.78    |

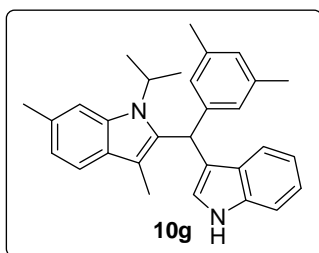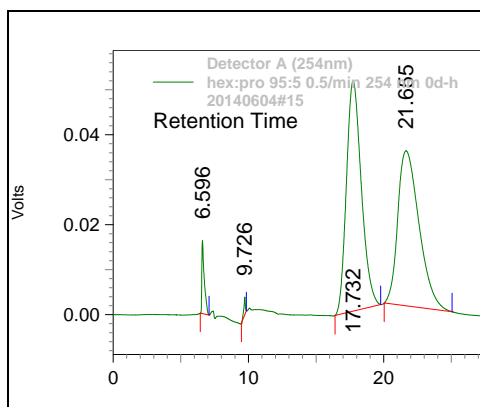

| Peak | RT (min) | Area (V*sec) | Area % | Height (V) | Height % |
|------|----------|--------------|--------|------------|----------|
| 1    | 17.732   | 3920907      | 50.30  | 51161      | 59.75    |
| 2    | 21.655   | 3873538      | 49.70  | 34461      | 40.25c   |

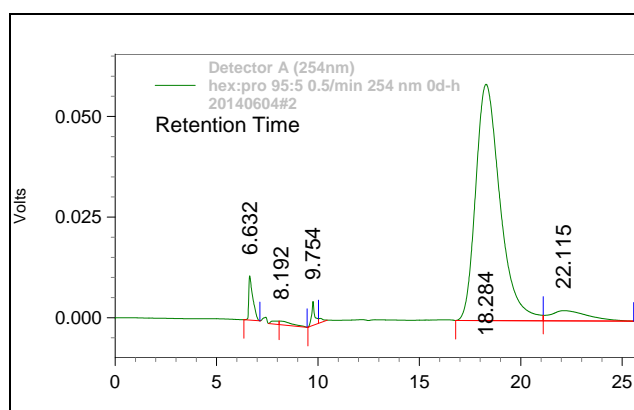

| Peak | RT (min) | Area (V*sec) | Area % | Height (V) | Height % |
|------|----------|--------------|--------|------------|----------|
| 1    | 18.284   | 4910811      | 95.60  | 58695      | 95.85    |
| 2    | 22.115   | 226004       | 4.40   | 2540       | 4.15     |

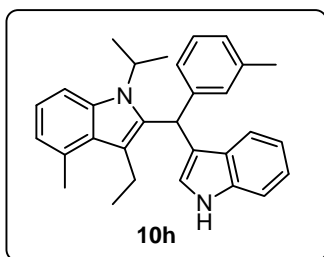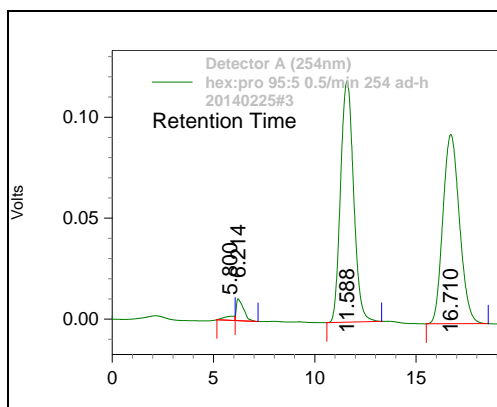

| Peak | RT<br>(min) | Area<br>(V*sec) | Area % | Height<br>(V) | Height % |
|------|-------------|-----------------|--------|---------------|----------|
| 1    | 11.588      | 5336205         | 50     | 119379        | 56.03    |
| 2    | 16.710      | 5334533         | 50     | 93698         | 43.97    |

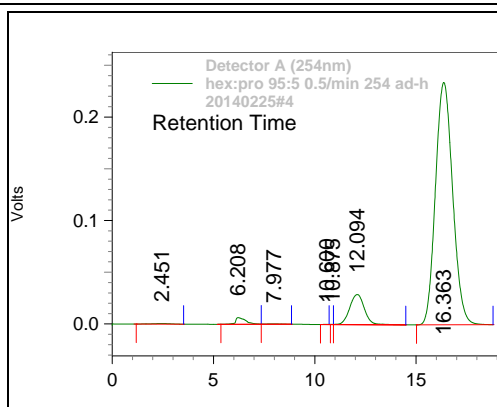

| Peak | RT<br>(min) | Area<br>(V*sec) | Area % | Height<br>(V) | Height % |
|------|-------------|-----------------|--------|---------------|----------|
| 1    | 12.093      | 1399710         | 9.21   | 28707         | 10.93    |
| 2    | 16.363      | 13797070        | 90.79  | 233965        | 89.07    |



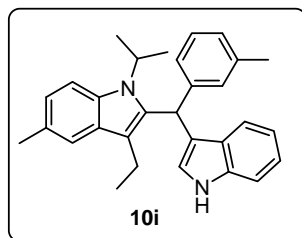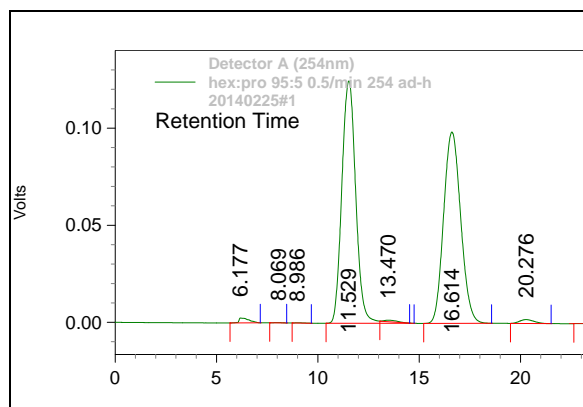

| Peak | RT<br>(min) | Area<br>(V*sec) | Area % | Height<br>(V) | Height % |
|------|-------------|-----------------|--------|---------------|----------|
| 1    | 11.529      | 5838800         | 50.29  | 124155        | 55.78    |
| 2    | 16.615      | 5759997         | 49.71  | 98471         | 44.22    |

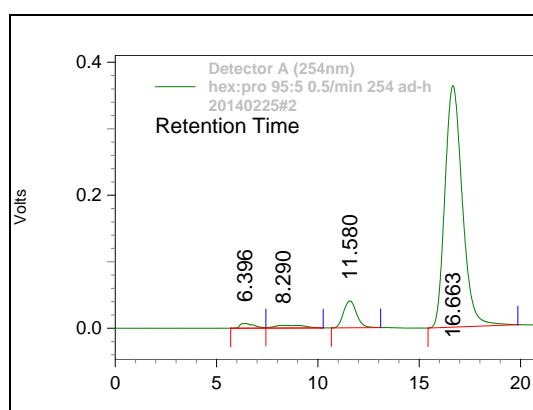

| Peak | RT<br>(min) | Area<br>(V*sec) | Area % | Height<br>(V) | Height % |
|------|-------------|-----------------|--------|---------------|----------|
| 1    | 11.580      | 1801671         | 7.67   | 40327         | 10.01    |
| 2    | 16.663      | 21699262        | 92.33  | 362831        | 89.99    |

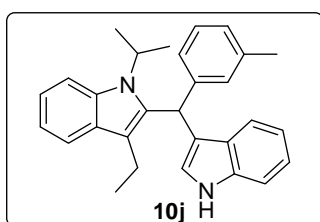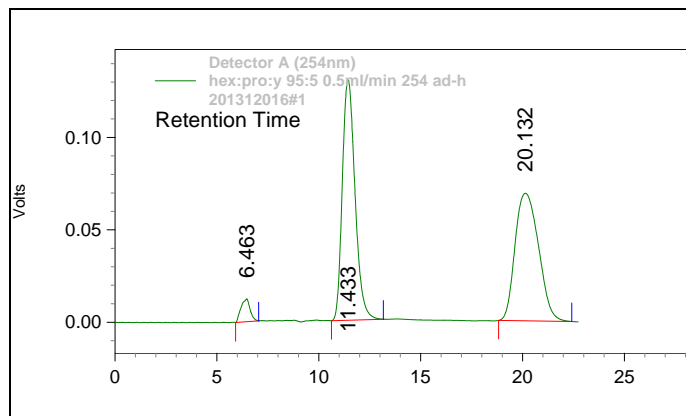

| Peak | RT (min) | Area (V*sec) | Area % | Height (V) | Height % |
|------|----------|--------------|--------|------------|----------|
| 1    | 11.433   | 5655267      | 50.53  | 130186     | 65.41    |
| 2    | 20.132   | 5536943      | 49.47  | 69042      | 34.59    |

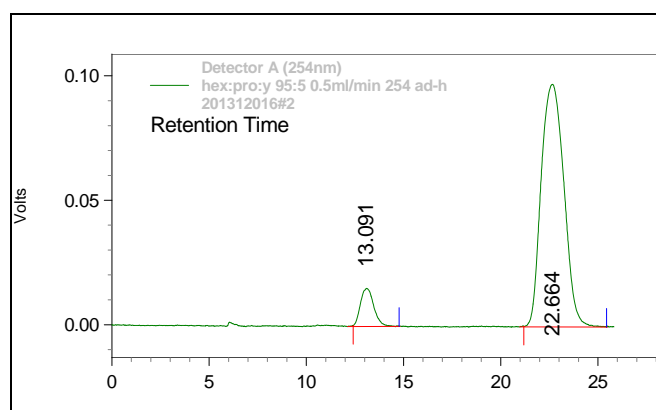

| Peak | RT (min) | Area (V*sec) | Area % | Height (V) | Height % |
|------|----------|--------------|--------|------------|----------|
| 1    | 13.091   | 726223       | 8.08   | 15324      | 13.58    |
| 2    | 22.664   | 7931997      | 91.92  | 97522      | 86.42    |

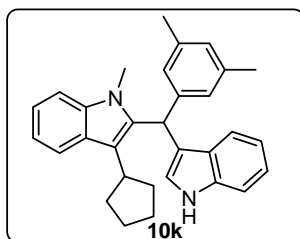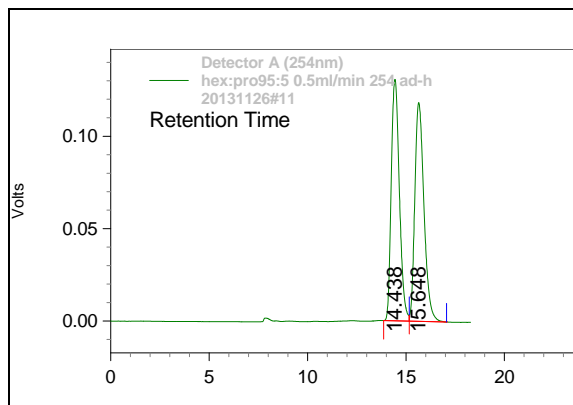

| Peak | RT<br>(min) | Area<br>(V*sec) | Area % | Height<br>(V) | Height % |
|------|-------------|-----------------|--------|---------------|----------|
| 1    | 14.438      | 3756953         | 49.50  | 130242        | 52.41    |
| 2    | 15.648      | 3832944         | 50.50  | 118286        | 47.59    |

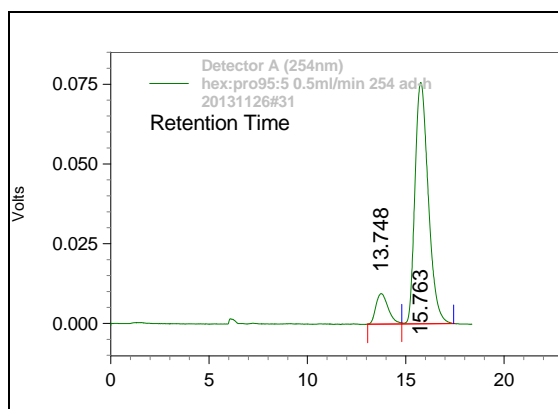

| Peak | RT<br>(min) | Area<br>(V*sec) | Area % | Height<br>(V) | Height % |
|------|-------------|-----------------|--------|---------------|----------|
| 1    | 13.748      | 404326          | 10.20  | 9561          | 11.23    |
| 2    | 15.763      | 3559065         | 89.80  | 75579         | 88.77    |

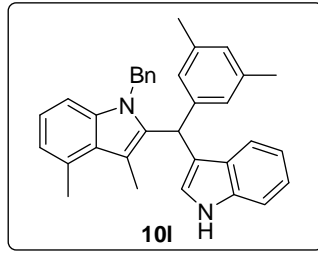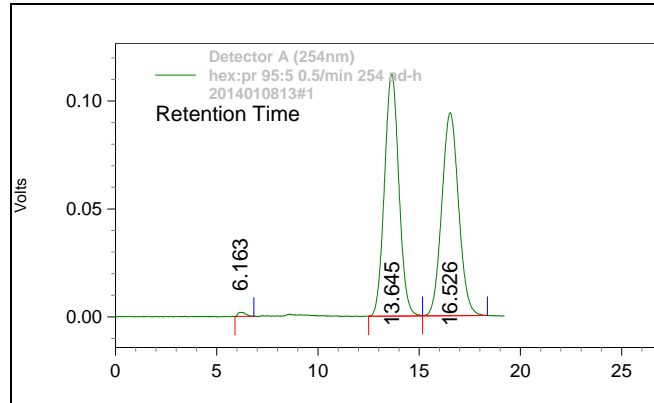

| Peak | RT (min) | Area (V*sec) | Area % | Height (V) | Height % |
|------|----------|--------------|--------|------------|----------|
| 1    | 13.645   | 5553044      | 50.45  | 112058     | 54.08    |
| 2    | 16.526   | 5433344      | 49.55  | 94040      | 45.92    |

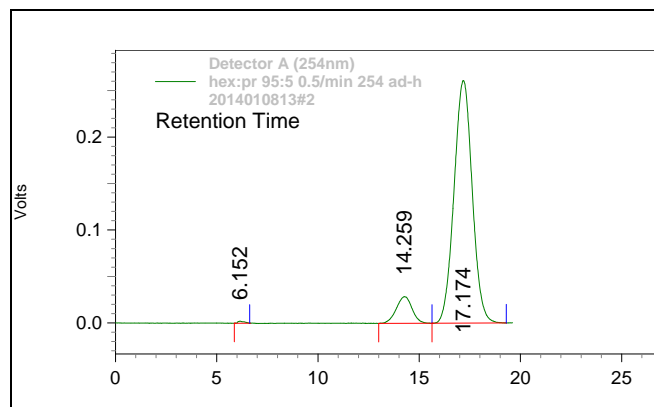

| Peak | RT (min) | Area (V*sec) | Area % | Height (V) | Height % |
|------|----------|--------------|--------|------------|----------|
| 1    | 14.259   | 1561685      | 8.63   | 28792      | 9.94     |
| 2    | 17.174   | 16527045     | 91.37  | 260758     | 90.06    |

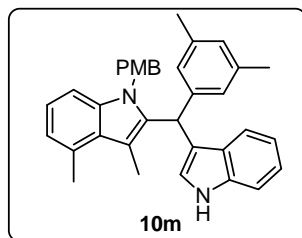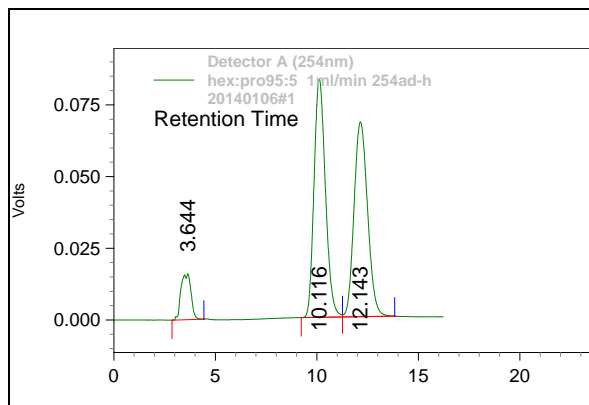

| Peak | RT<br>(min) | Area<br>(V*sec) | Area % | Height<br>(V) | Height % |
|------|-------------|-----------------|--------|---------------|----------|
| 1    | 10.116      | 3250995         | 50.77  | 83077         | 55.02    |
| 2    | 12.143      | 3152313         | 49.23  | 67906         | 44.98    |

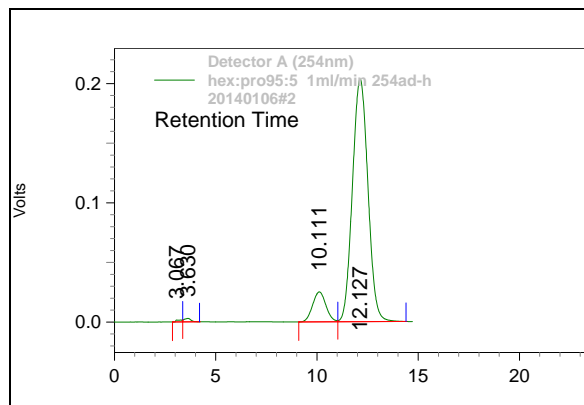

| Peak | RT<br>(min) | Area<br>(V*sec) | Area % | Height<br>(V) | Height % |
|------|-------------|-----------------|--------|---------------|----------|
| 1    | 10.111      | 1150780         | 9.52   | 25106         | 10.99    |
| 2    | 12.127      | 10933386        | 90.48  | 203310        | 89.01    |

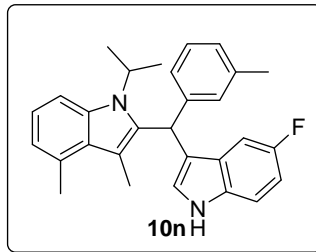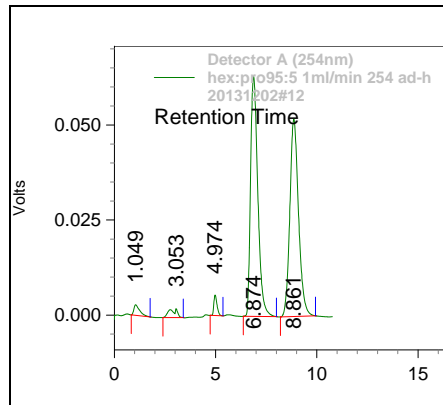

| Peak | RT (min) | Area (V*sec) | Area % | Height (V) | Height % |
|------|----------|--------------|--------|------------|----------|
| 1    | 6.874    | 1578044      | 50.09  | 63164      | 54.78    |
| 2    | 8.861    | 1568737      | 49.91  | 52.021     | 45.22    |

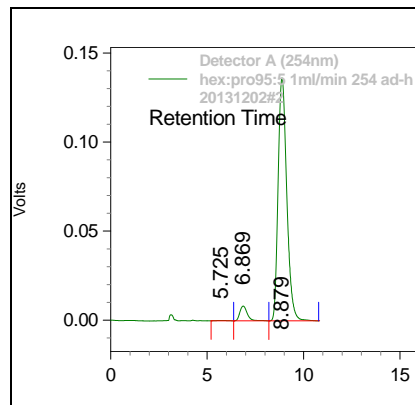

| Peak | RT (min) | Area (V*sec) | Area % | Height (V) | Height % |
|------|----------|--------------|--------|------------|----------|
| 1    | 6.869    | 222416       | 4.95   | 8280       | 5.72     |
| 2    | 8.879    | 4268602      | 95.05  | 136393     | 94.28    |

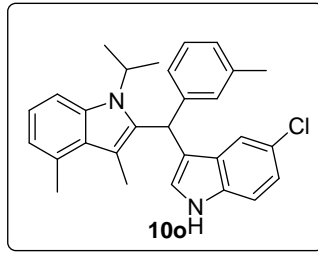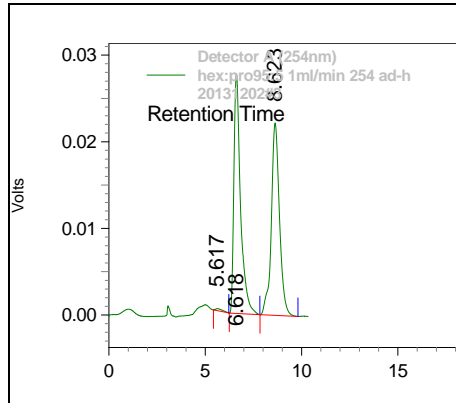

| Peak | RT (min) | Area (V*sec) | Area % | Height (V) | Height % |
|------|----------|--------------|--------|------------|----------|
| 1    | 6.618    | 666328       | 50.30  | 27634      | 55.40    |
| 2    | 8.623    | 657562       | 49.70  | 22206      | 44.60    |

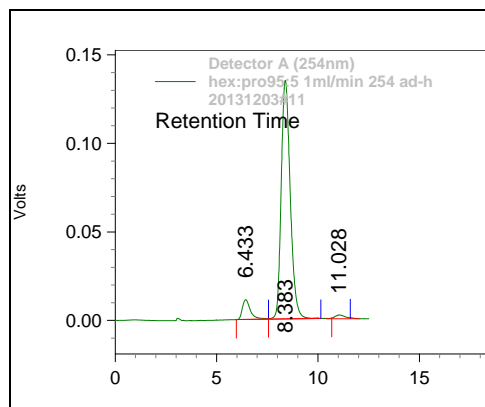

| Peak | RT (min) | Area (V*sec) | Area % | Height (V) | Height % |
|------|----------|--------------|--------|------------|----------|
| 1    | 6.433    | 283602       | 6.23   | 11114      | 7.62     |
| 2    | 8.383    | 4268602      | 93.77  | 134679     | 92.38    |

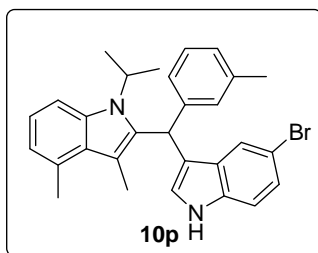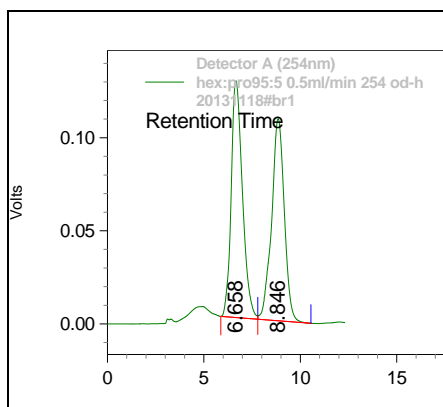

| Peak | RT (min) | Area (V*sec) | Area % | Height (V) | Height % |
|------|----------|--------------|--------|------------|----------|
| 1    | 6.658    | 5173634      | 50.96  | 127083     | 53.93    |
| 2    | 8.846    | 4978259      | 49.04  | 108573     | 46.07    |

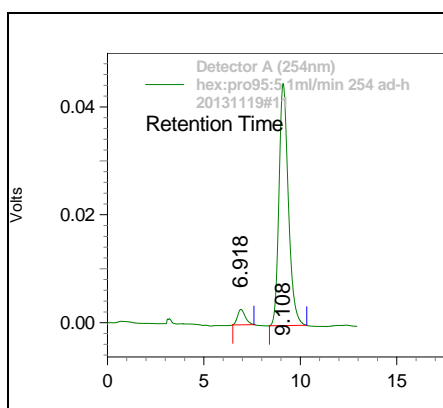

| Peak | RT (min) | Area (V*sec) | Area % | Height (V) | Height % |
|------|----------|--------------|--------|------------|----------|
| 1    | 6.918    | 83532        | 5.20   | 2908       | 6.08     |
| 2    | 9.108    | 1523685      | 94.80  | 44893      | 93.92    |



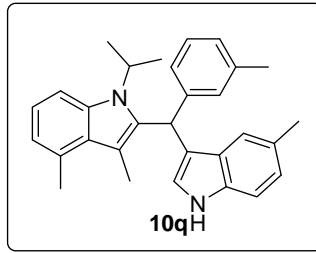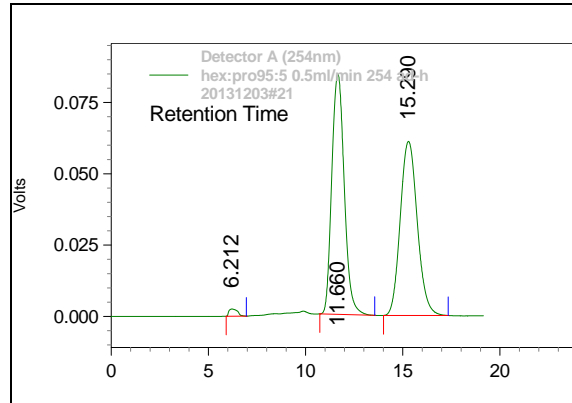

| Peak | RT (min) | Area (V*sec) | Area % | Height (V) | Height % |
|------|----------|--------------|--------|------------|----------|
| 1    | 11.660   | 3764516      | 50.27  | 84262      | 57.99    |
| 2    | 15.290   | 3723998      | 49.73  | 61032      | 42.01    |

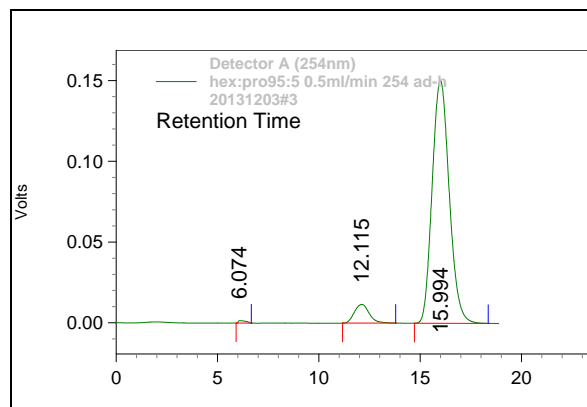

| Peak | RT (min) | Area (V*sec) | Area % | Height (V) | Height % |
|------|----------|--------------|--------|------------|----------|
| 1    | 12.115   | 592047       | 6.30   | 11585      | 7.15     |
| 2    | 15.994   | 8808823      | 93.70  | 150346     | 92.85    |

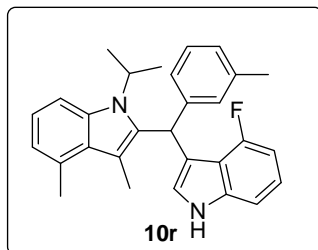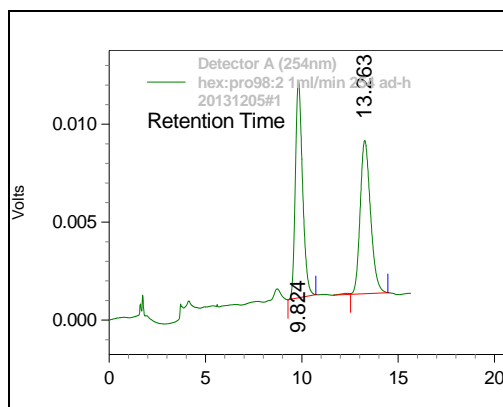

| Peak | RT (min) | Area (V*sec) | Area % | Height (V) | Height % |
|------|----------|--------------|--------|------------|----------|
| 1    | 9.824    | 286322       | 49.63  | 11070      | 58.58    |
| 2    | 13.263   | 290558       | 50.37  | 7828       | 41.42    |

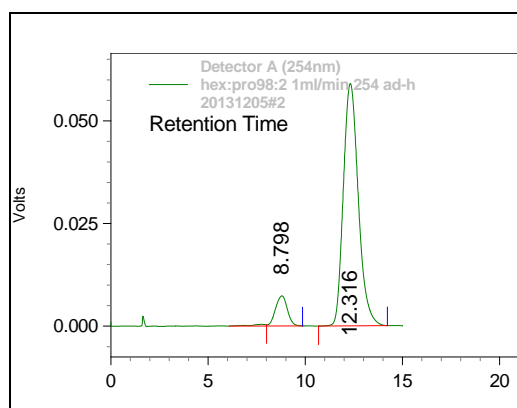

| Peak | RT (min) | Area (V*sec) | Area % | Height (V) | Height % |
|------|----------|--------------|--------|------------|----------|
| 1    | 8.798    | 308107       | 8.49   | 7312       | 11.02    |
| 2    | 12.316   | 3196123      | 91.51  | 59063      | 88.98    |

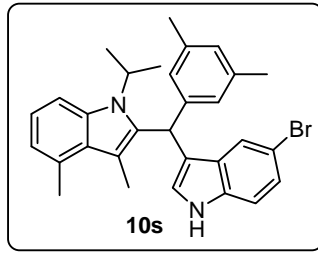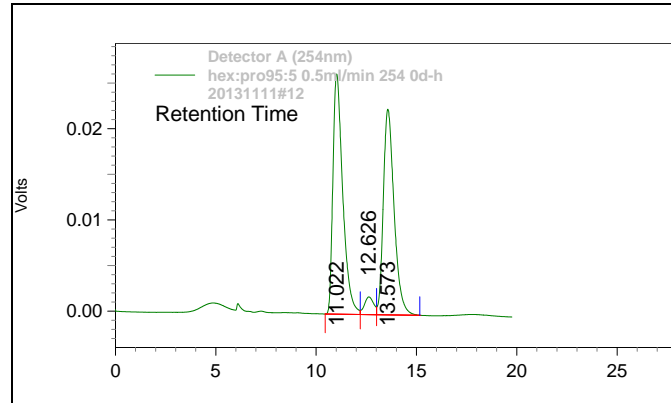

| Peak | RT (min) | Area (V*sec) | Area % | Height (V) | Height % |
|------|----------|--------------|--------|------------|----------|
| 1    | 11.022   | 898573       | 51.59  | 26318      | 53.87    |
| 2    | 13.573   | 843023       | 48.41  | 22537      | 46.13    |

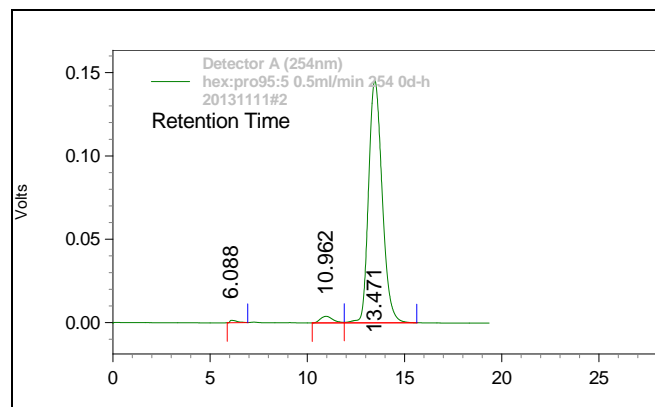

| Peak | RT (min) | Area (V*sec) | Area % | Height (V) | Height % |
|------|----------|--------------|--------|------------|----------|
| 1    | 10.962   | 175861       | 2.43   | 3940       | 2.64     |
| 2    | 13.471   | 7067869      | 97.57  | 145388     | 97.36    |

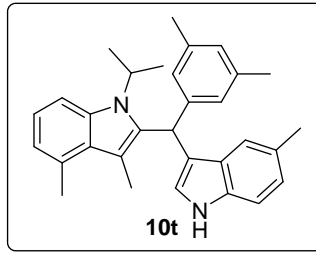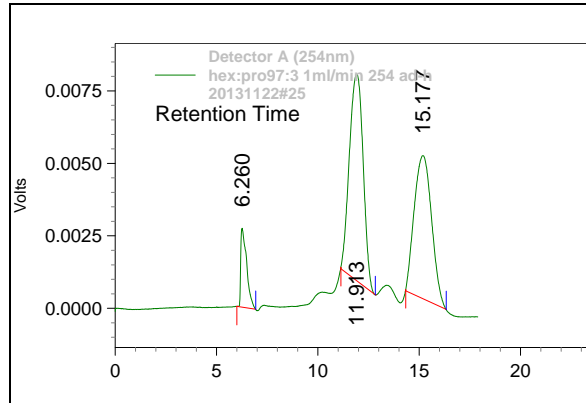

| Peak | RT (min) | Area (V*sec) | Area % | Height (V) | Height % |
|------|----------|--------------|--------|------------|----------|
| 1    | 11.913   | 316025       | 51.78  | 7128       | 59.10    |
| 2    | 15.177   | 294250       | 48.22  | 4933       | 40.90    |

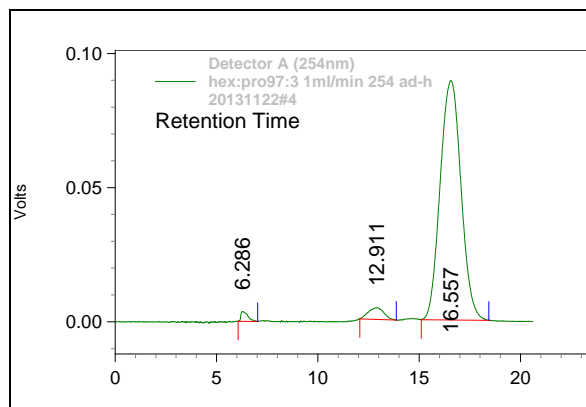

| Peak | RT (min) | Area (V*sec) | Area % | Height (V) | Height % |
|------|----------|--------------|--------|------------|----------|
| 1    | 12.911   | 232210       | 3.51   | 5251       | 5.52     |
| 2    | 16.557   | 6380734      | 96.49  | 89810      | 94.48    |

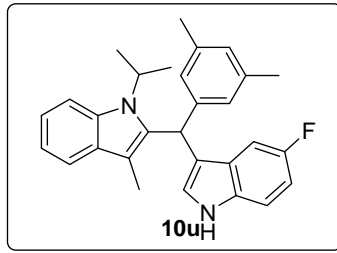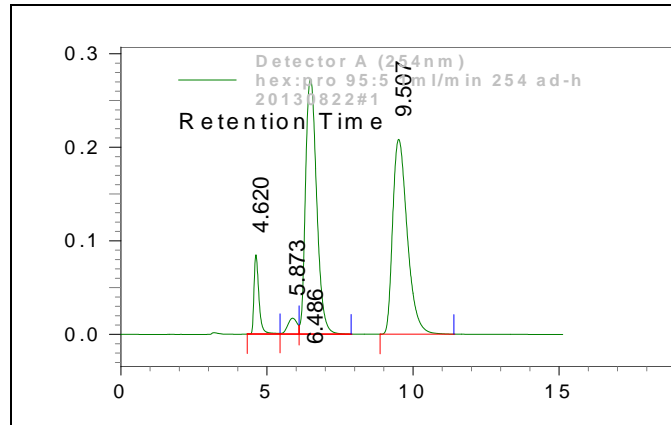

| Peak | RT (min) | Area (V*sec) | Area % | Height (V) | Height % |
|------|----------|--------------|--------|------------|----------|
| 1    | 6.486    | 7233718      | 50.03  | 272810     | 56.69    |
| 2    | 9.507    | 7224270      | 49.97  | 208406     | 43.31    |

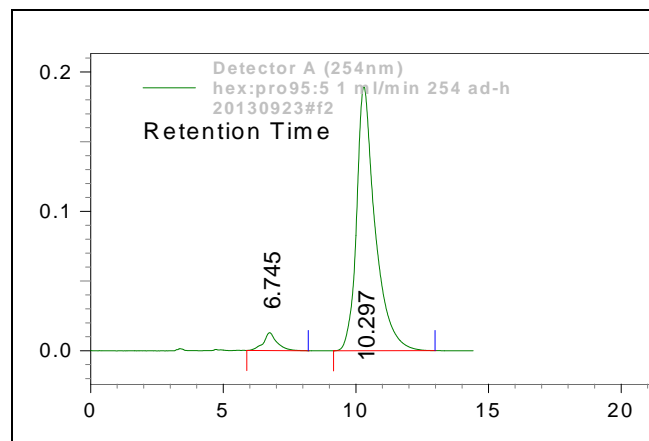

| Peak | RT (min) | Area (V*sec) | Area % | Height (V) | Height % |
|------|----------|--------------|--------|------------|----------|
| 1    | 6.745    | 450587       | 4.66   | 12780      | 6.32     |
| 2    | 10.297   | 9213258      | 95.34  | 189452     | 93.68    |

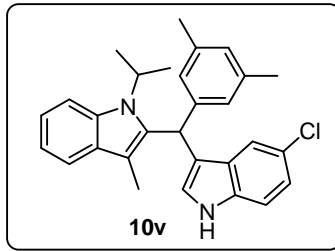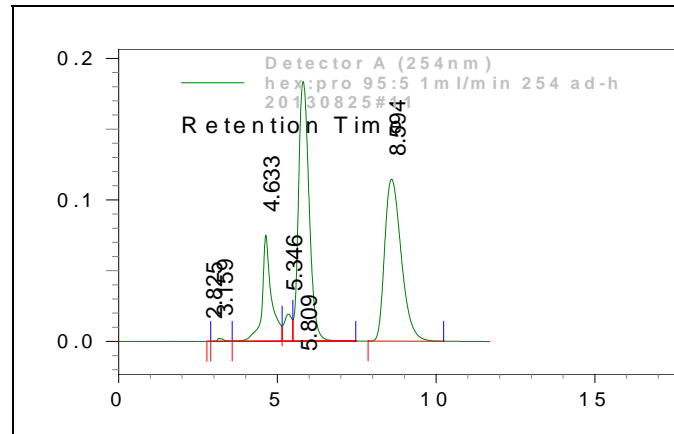

| Peak | RT (min) | Area (V*sec) | Area % | Height (V) | Height % |
|------|----------|--------------|--------|------------|----------|
| 1    | 5.809    | 4279950      | 50.73  | 183428     | 61.58    |
| 2    | 8.594    | 4156263      | 49.27  | 114418     | 38.42    |

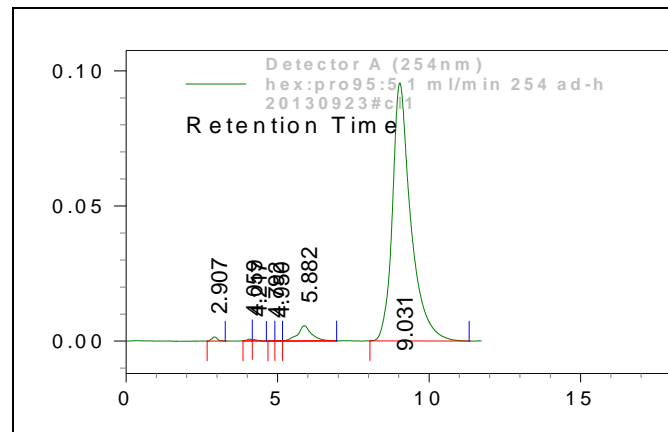

| Peak | RT (min) | Area (V*sec) | Area % | Height (V) | Height % |
|------|----------|--------------|--------|------------|----------|
| 1    | 5.882    | 172245       | 4.10   | 5581       | 5.52     |
| 2    | 9.031    | 40283389     | 95.90  | 95507      | 94.48    |

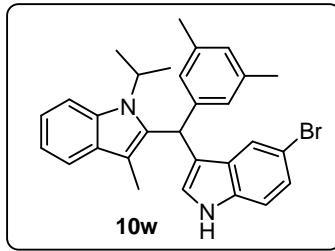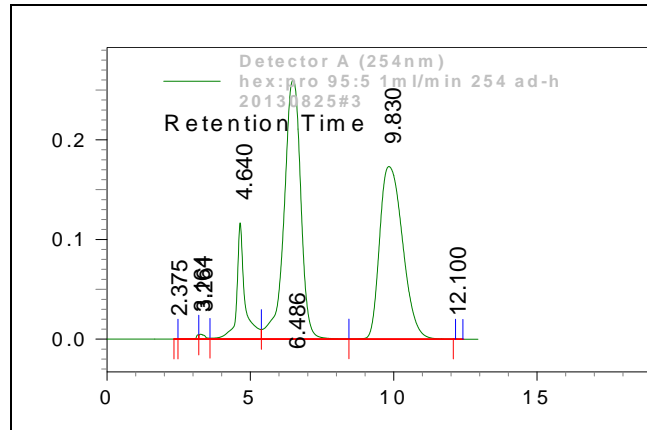

| Peak | RT (min) | Area (V*sec) | Area % | Height (V) | Height % |
|------|----------|--------------|--------|------------|----------|
| 1    | 6.486    | 10561589     | 51.45  | 260000     | 60.00    |
| 2    | 9.830    | 9964604      | 48.55  | 173224     | 40.00    |

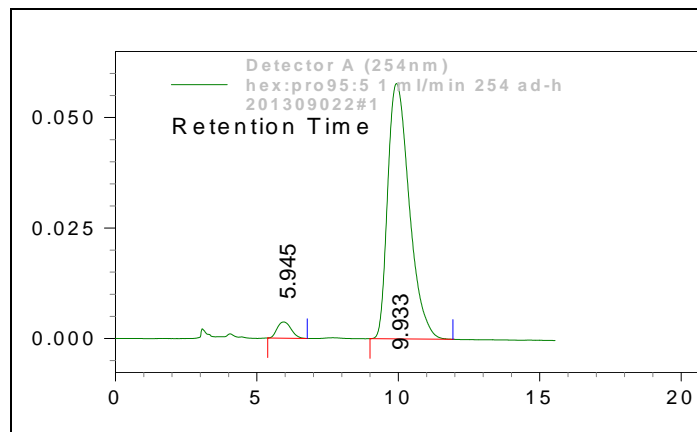

| Peak | RT (min) | Area (V*sec) | Area % | Height (V) | Height % |
|------|----------|--------------|--------|------------|----------|
| 1    | 5.945    | 125563       | 3.94   | 3658       | 5.96     |
| 2    | 9.933    | 3060191      | 96.06  | 57772      | 94.04    |

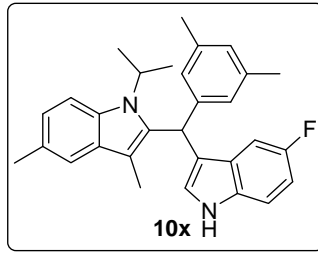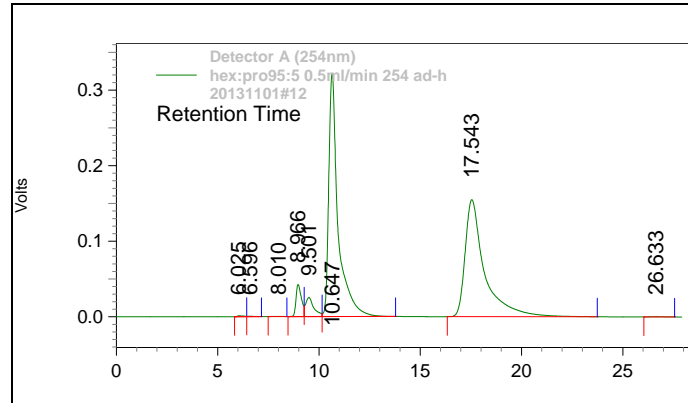

| Peak | RT (min) | Area (V*sec) | Area % | Height (V) | Height % |
|------|----------|--------------|--------|------------|----------|
| 1    | 10.467   | 10302661     | 49.99  | 320844     | 67.46    |
| 2    | 17.543   | 10306443     | 50.01  | 154795     | 32.54    |

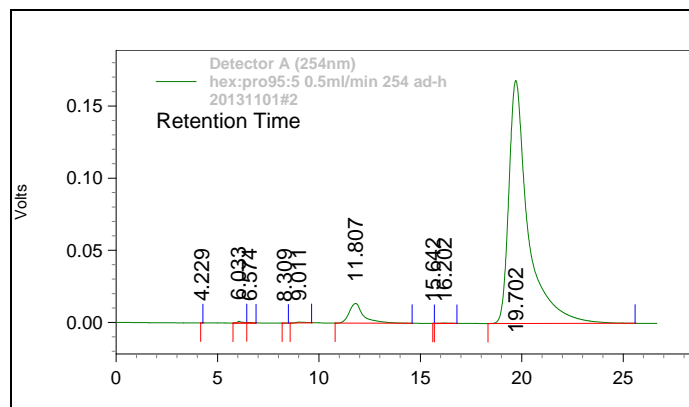

| Peak | RT (min) | Area (V*sec) | Area % | Height (V) | Height % |
|------|----------|--------------|--------|------------|----------|
| 1    | 11.807   | 675106       | 5.75   | 13657      | 7.50     |
| 2    | 19.702   | 11056829     | 94.25  | 168427     | 92.50    |



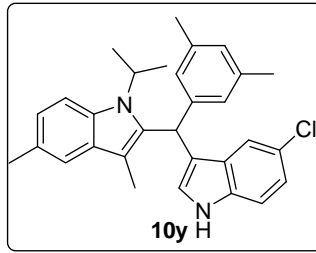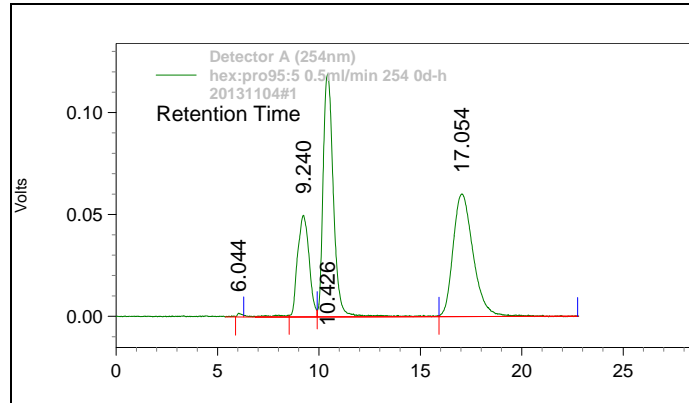

| Peak | RT (min) | Area (V*sec) | Area % | Height (V) | Height % |
|------|----------|--------------|--------|------------|----------|
| 1    | 10.426   | 4136150      | 50.48  | 119179     | 66.44    |
| 2    | 17.054   | 4057745      | 49.52  | 60205      | 33.56    |

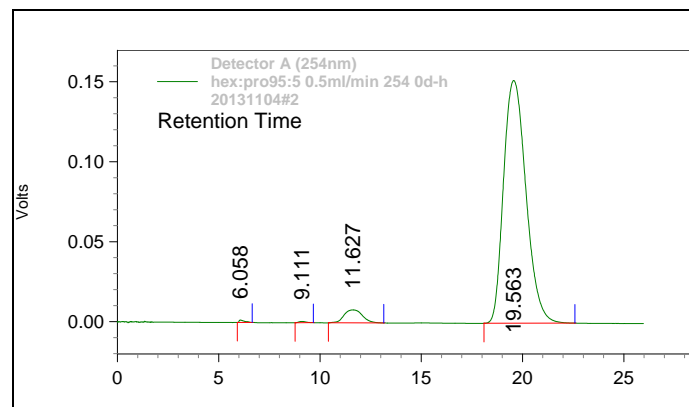

| Peak | RT (min) | Area (V*sec) | Area % | Height (V) | Height % |
|------|----------|--------------|--------|------------|----------|
| 1    | 11.627   | 509765       | 4.11   | 8086       | 5.06     |
| 2    | 19.563   | 11697732     | 95.89  | 151832     | 94.94    |

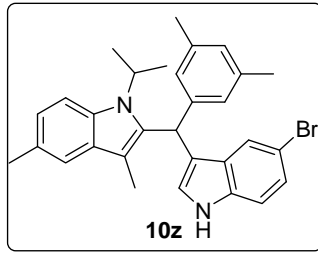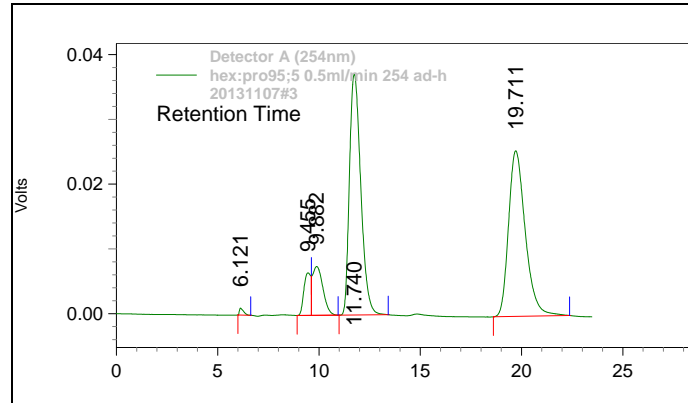

| Peak | RT (min) | Area (V*sec) | Area % | Height (V) | Height % |
|------|----------|--------------|--------|------------|----------|
| 1    | 11.740   | 1446553      | 49.59  | 37224      | 59.27    |
| 2    | 19.711   | 1470709      | 50.41  | 25581      | 40.73    |

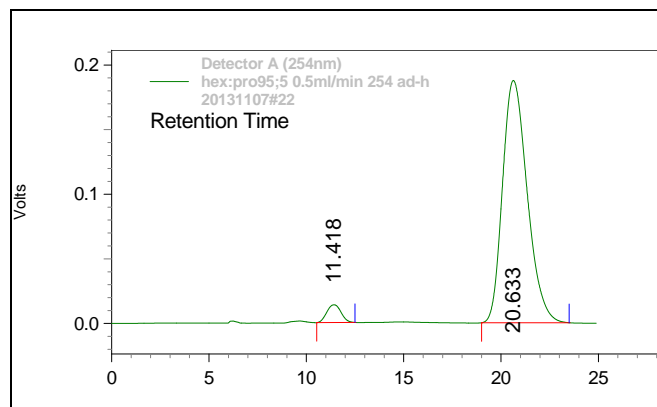

| Peak | RT (min) | Area (V*sec) | Area % | Height (V) | Height % |
|------|----------|--------------|--------|------------|----------|
| 1    | 11.418   | 697866       | 4.05   | 13740      | 6.83     |
| 2    | 20.633   | 16540791     | 95.95  | 187359     | 93.17    |

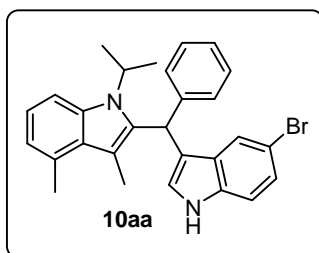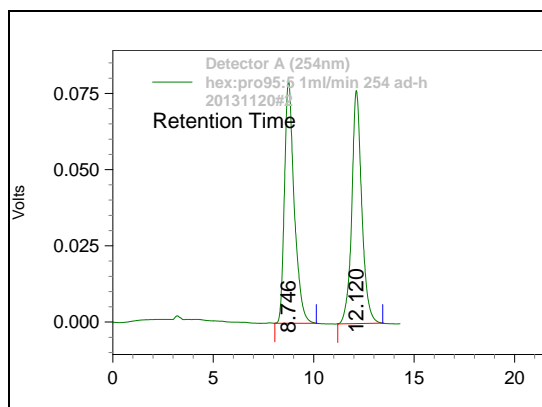

| Peak | RT (min) | Area (V*sec) | Area % | Height (V) | Height % |
|------|----------|--------------|--------|------------|----------|
| 1    | 8.746    | 2678658      | 50.22  | 79461      | 50.98    |
| 2    | 12.120   | 2655137      | 49.78  | 76421      | 49.02    |

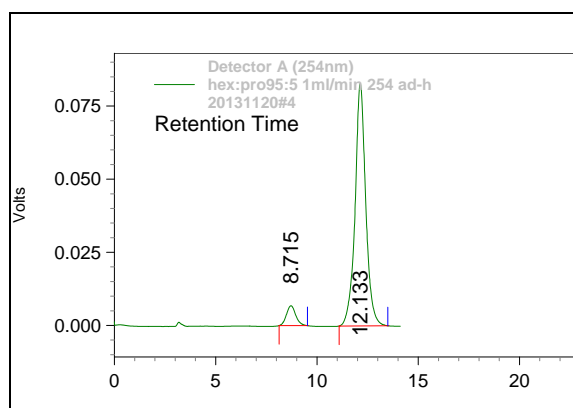

| Peak | RT (min) | Area (V*sec) | Area % | Height (V) | Height % |
|------|----------|--------------|--------|------------|----------|
| 1    | 8.715    | 288623       | 6.89   | 8120       | 7.42     |
| 2    | 12.133   | 3901444      | 93.11  | 101276     | 92.58    |

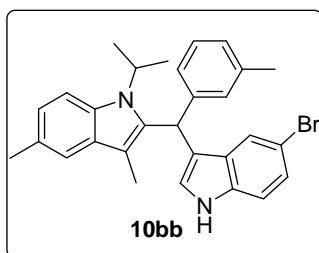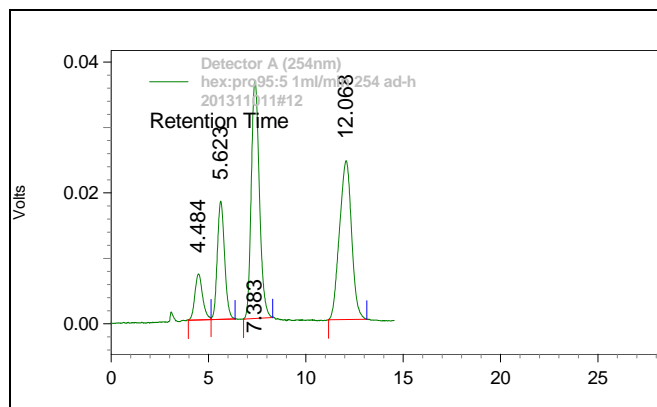

| Peak | RT (min) | Area (V*sec) | Area % | Height (V) | Height % |
|------|----------|--------------|--------|------------|----------|
| 1    | 7.383    | 1067932      | 50.58  | 36472      | 60.05    |
| 2    | 12.068   | 1043341      | 49.42  | 24263      | 39.95    |

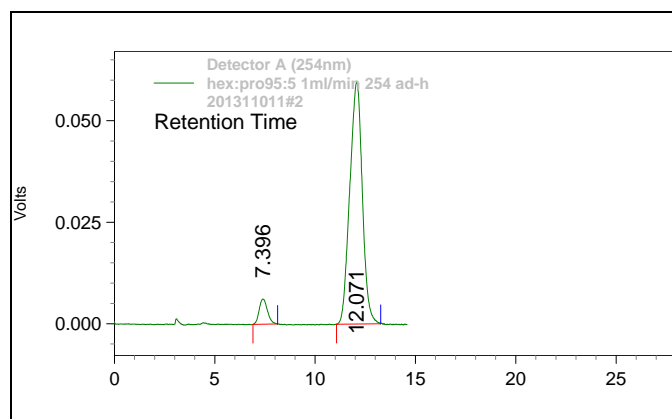

| Peak | RT (min) | Area (V*sec) | Area % | Height (V) | Height % |
|------|----------|--------------|--------|------------|----------|
| 1    | 7.396    | 177703       | 6.42   | 6185       | 9.42     |
| 2    | 12.071   | 2589930      | 93.58  | 59507      | 90.58    |
